# Supplementary material for: Acid-promoted cycloisomerizations of phenylallenes bearing acetalic functions at the ortho position: a stereocontrolled entry to indeno-fused dioxepanes, dioxocanes and thioanalogues
Source: Royal Society of Chemistry journal article supplement (doi:10.1039/c5ob00897b), 2015-01-01
Supplement: c5ob00897b1.pdf [file c5ob00897b1.pdf]

## Supplementary Information

**Acid-Promoted Cycloisomerization of Phenylallenes Bearing Acetalic Functions at *ortho* Position: a Stereocontrolled Entry to Indeno-Fused Dioxepanes, Dioxocanes and Thioanalogues**

Marta Marin-Luna, Angel Vidal,\* Delia Bautista, Raul-Angel Orenes and Mateo Alajarin\*

## Table of contents

|                                                    |         |
|----------------------------------------------------|---------|
| General information                                | S1      |
| Experimental procedures and spectral data          | S1-S21  |
| Results of DFT calculations                        | S21-S24 |
| References                                         | S24-S25 |
| <sup>1</sup> H NMR and <sup>13</sup> C NMR spectra | S26-S53 |

## General Methods

All melting points are uncorrected. Infrared (IR) spectra were recorded as Nujol emulsions or neat.  $^1\text{H}$  NMR spectra were recorded in  $\text{CDCl}_3$  or  $\text{CD}_2\text{Cl}_2$  at 300 or 400 MHz.  $^{13}\text{C}$  NMR spectra were recorded in  $\text{CDCl}_3$  or  $\text{CD}_2\text{Cl}_2$  at 75 or 100 MHz. The chemical shifts are expressed in ppm, relative to  $\text{Me}_4\text{Si}$  at  $\delta = 0.00$  ppm for  $^1\text{H}$ , while the chemical shifts for  $^{13}\text{C}$  are reported relative to the resonance of  $\text{CDCl}_3$   $\delta = 77.1$  ppm or  $\text{CD}_2\text{Cl}_2$   $\delta = 54.0$  ppm. Mass spectra were recorded on a HPLC/MS TOF 6220 Agilent Technologies apparatus.

**Materials:** 2-(1,3-Dioxolan-2-yl)benzaldehyde **13a**,<sup>1</sup> 2-(1,3-dioxolan-2-yl)-4-methoxybenzaldehyde **13b**,<sup>2</sup> 2-(1,3-dioxan-2-yl)benzaldehyde **13c**,<sup>3</sup> 2-(2-bromophenyl)-1,3-oxathiolane **17**<sup>4</sup> and 2-(dimethoxymethyl)benzaldehyde **21**<sup>5</sup> were prepared following published experimental procedures.

## General procedure for the preparation of the propargylic alcohols **14**

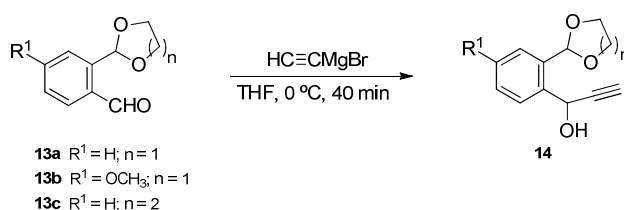

To a solution of the 2-(1,3-dioxolan-2-yl)benzaldehyde or 2-(1,3-dioxan-2-yl)benzaldehyde **13** (3 mmol) in anhydrous THF (30 mL) at 0 °C was added 0.5 M solution of ethynylmagnesium bromide in THF (6 mL, 3 mmol). The reaction mixture was stirred at 0 °C for 40 min. Then, saturated aqueous solution of  $\text{NH}_4\text{Cl}$  (10 mL) was added. The mixture was extracted with dichloromethane ( $2 \times 30$  mL). The organic layers were combined, washed with water ( $2 \times 100$  mL) and dried over anhydrous  $\text{MgSO}_4$ . The solvent was removed under reduced pressure and the resulting oil was purified by silica gel column chromatography.

**Propargylic alcohol 14a** ( $\text{R}^1 = \text{H}, n = 1$ ): (hexanes/diethyl ether 1:1); (0.66 g, 99%); yellow oil;  $\delta_{\text{H}}$  (300 MHz;  $\text{CDCl}_3$ ) 2.65 (d,  $J = 2.5$  Hz, 1H), 3.79 (br s, 1H), 3.98-4.07 (m, 2H), 4.08-4.17 (m, 2H), 5.81 (s, 1H), 6.14 (br s, 1H), 7.32-7.44 (m, 2H), 7.56 (dd,  $J = 1.8, 7.3$  Hz, 1H), 7.78 (dd,  $J = 1.8, 7.3$  Hz, 1H) ppm;  $\delta_{\text{C}}$  (75 MHz;  $\text{CDCl}_3$ ) 61.7, 65.0, 65.1, 74.8, 82.8 (s), 102.3, 127.2, 128.4, 128.5, 129.7, 134.2 (s), 138.7 (s) ppm; IR (Neat):  $\nu_{\text{max}}/\text{cm}^{-1}$  3417, 3288, 1456; HRMS (ESI):  $m/z$  calcd for  $\text{C}_{12}\text{H}_{12}\text{NaO}_3$ : 227.0679  $[\text{M}+\text{Na}]^+$ ; found: 227.0679.

**Propargylic alcohol 14b** ( $R^1 = \text{OCH}_3$ ,  $n = 1$ ): (hexanes/ethyl acetate 3:2); (0.61 g, 87%); yellow oil;  $\delta_{\text{H}}$  (300 MHz;  $\text{CD}_2\text{Cl}_2$ ) 2.65 (d,  $J = 2.4$  Hz, 1H), 3.41 (d,  $J = 5.4$  Hz, 1H), 3.80 (s, 3H), 4.03-4.13 (m, 4H), 5.70 (dd,  $J = 2.4, 5.4$  Hz, 1H), 6.08 (s, 1H), 7.10 (d,  $J = 2.7$  Hz, 1H), 7.66 (d,  $J = 8.4$  Hz, 1H), 7.69 (dd,  $J = 2.7, 8.4$  Hz, 1H) ppm,  $\delta_{\text{C}}$  (75 MHz;  $\text{CD}_2\text{Cl}_2$ ) 55.9, 61.7, 65.6, 65.7, 74.7, 83.7 (s), 102.4, 113.3, 114.7, 130.4, 131.6 (s), 136.7 (s), 160.2 (s) ppm; IR (Neat):  $\nu_{\text{max}}/\text{cm}^{-1}$  3439, 3285, 1611, 1582; HRMS (ESI):  $m/z$  calcd for  $\text{C}_{13}\text{H}_{14}\text{NaO}_4$ : 257.0784  $[\text{M}+\text{Na}]^+$ ; found: 257.0787.

**Propargylic alcohol 14c** ( $R^1 = \text{H}$ ,  $n = 2$ ): (hexanes/diethyl ether 2:3); (0.40 g, 62%); yellow oil;  $\delta_{\text{H}}$  (400 MHz;  $\text{CD}_2\text{Cl}_2$ ) 1.39-1.47 (m, 1H), 2.14-2.26 (m, 1H), 2.67 (d,  $J = 2.4$  Hz, 1H), 3.78 (d,  $J = 4.8$  Hz, 1H), 3.93-4.02 (m, 2H), 4.19-4.27 (m, 2H), 5.77 (s, 1H), 5.95-5.97 (m, 1H), 7.30-7.40 (m, 2H), 7.48 (dd,  $J = 1.6, 7.2$  Hz, 1H), 7.74 (dd,  $J = 1.6, 7.2$  Hz, 1H) ppm;  $\delta_{\text{C}}$  (100 MHz;  $\text{CD}_2\text{Cl}_2$ ) 26.1, 62.2, 68.1, 68.2, 74.9, 83.6 (s), 102.2, 128.0, 128.9, 130.0, 136.2 (s), 139.0 (s) ppm; IR (Neat):  $\nu_{\text{max}}/\text{cm}^{-1}$  3418, 3288, 1458, 1401; HRMS (ESI):  $m/z$  calcd for  $\text{C}_{13}\text{H}_{14}\text{NaO}_3$ : 241.0835  $[\text{M}+\text{Na}]^+$ ; found 241.0835.

### General procedure for the preparation of the propargyl carbonates 15

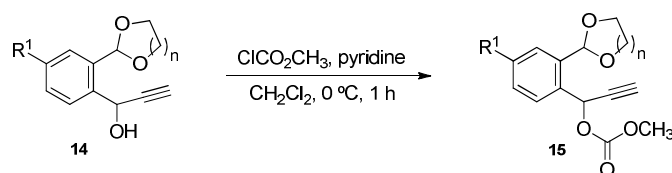

To a solution of the appropriate propargylic alcohol **14** (3 mmol) in anhydrous dichloromethane (20 mL), under nitrogen at 0 °C, dry pyridine (0.72 mL, 9 mmol) and methyl chloroformate (0.69 mL, 9 mmol) were added. The resulting mixture was stirred at 0 °C for 1 h. Then, saturated aqueous solution of  $\text{NH}_4\text{Cl}$  (20 mL) was added, and the resulting mixture was extracted with dichloromethane ( $2 \times 30$  mL). The combined organic layers were washed with water ( $2 \times 50$  mL), and dried over anhydrous  $\text{MgSO}_4$ . The solvent was removed under reduce pressure and the residue was purified by silica gel column chromatography.

**Propargyl carbonate 15a** ( $R^1 = \text{H}$ ,  $n = 1$ ): (hexanes/diethyl ether 1:4); (0.69 g, 88%); yellow oil;  $\delta_{\text{H}}$  (300 MHz;  $\text{CDCl}_3$ ) 2.69 (d,  $J = 2.4$  Hz, 1H), 3.81 (s, 3H), 4.00-4.19 (m, 4H), 6.04 (s, 1H), 6.77 (d,  $J = 2.4$  Hz, 1H), 7.36-7.47 (m, 2H), 7.57 (dd,  $J = 1.8, 7.2$  Hz, 1H), 7.79 (dd,  $J =$

1.8, 7.2 Hz, 1H) ppm;  $\delta_C$  (75 MHz;  $\text{CDCl}_3$ ) 55.2, 65.2, 65.3, 65.8, 76.2, 80.0 (s), 102.0, 127.2, 128.8, 129.3, 129.7, 134.6 (s), 135.0 (s), 154.8 (s) ppm; IR (Neat):  $\nu_{\text{max}}/\text{cm}^{-1}$  1747, 1441, 1315; HRMS (ESI):  $m/z$  calcd for  $\text{C}_{14}\text{H}_{14}\text{NaO}_5$ : 285.0733  $[\text{M}+\text{Na}]^+$ ; found: 285.0727.

**Propargyl carbonate 15b ( $\text{R}^1 = \text{OCH}_3$ ,  $n = 1$ ):** (hexanes/diethyl ether 1:4); (0.79 g, 90%); yellow oil;  $\delta_H$  (300 MHz;  $\text{CDCl}_3$ ) 2.68 (d,  $J = 2.1$  Hz, 1H), 3.79 (s, 3H), 3.82 (s, 3H), 4.06-4.18 (m, 4H), 6.02 (s, 1H), 6.69 (d,  $J = 2.1$  Hz, 1H), 6.93 (dd,  $J = 2.7, 8.4$  Hz, 1H), 7.11 (d,  $J = 2.7$  Hz, 1H), 7.72 (d,  $J = 8.4$  Hz, 1H) ppm;  $\delta_C$  (75 MHz;  $\text{CDCl}_3$ ) 55.1, 55.4, 65.3, 65.6, 76.0, 80.2 (s), 101.6, 112.5, 114.9, 126.5 (s), 130.7, 136.8 (s), 154.8 (s), 160.3 (s) ppm; IR (Neat):  $\nu_{\text{max}}/\text{cm}^{-1}$  3303, 1750, 1611, 1052; HRMS (ESI):  $m/z$  calcd for  $\text{C}_{15}\text{H}_{16}\text{NaO}_6$ : 315.0839  $[\text{M}+\text{Na}]^+$ ; found 315.0841.

**Propargyl carbonate 15c ( $\text{R}^1 = \text{H}$ ,  $n = 2$ ):** (hexanes/diethyl ether 3:2); (0.61 g, 74%); yellow oil;  $\delta_H$  (400 MHz;  $\text{CDCl}_3$ ) 1.40-1.45 (m, 1H), 2.24-2.34 (m, 1H), 2.69 (d,  $J = 2.4$  Hz, 1H), 3.80 (s, 3H), 3.95-4.01 (m, 2H), 4.19-4.28 (m, 2H), 5.68 (s, 1H), 6.92 (d,  $J = 2.4$  Hz, 1H), 7.37-7.41 (m, 2H), 7.53-7.55 (m, 1H), 7.78-7.80 (m, 1H) ppm;  $\delta_C$  (100 MHz;  $\text{CDCl}_3$ ) 25.4, 55.0, 65.9, 67.5, 76.0, 80.2 (s), 100.7, 127.1, 129.0, 129.3, 129.4, 133.6 (s), 136.0 (s), 154.7 (s) ppm; IR (Neat):  $\nu_{\text{max}}/\text{cm}^{-1}$  3284, 1750, 1441; HRMS (ESI):  $m/z$  calcd for  $\text{C}_{15}\text{H}_{16}\text{NaO}_5$ : 299.0895  $[\text{M}+\text{Na}]^+$ ; found 299.0890.

### General procedure for the preparation of the allenenes 5a-e

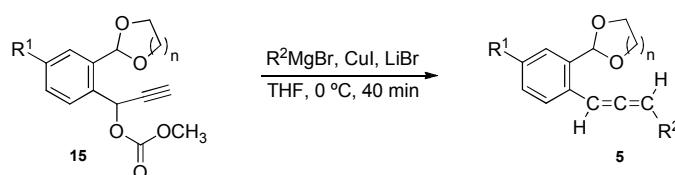

To a  $0\text{ }^\circ\text{C}$  cooled solution of  $\text{CuI}$  (9.6 g, 50 mmol) and  $\text{LiBr}$  (4.34 g, 50 mmol) in anhydrous  $\text{THF}$  (40 mL), 1.0 M *tert*-butylmagnesium bromide in  $\text{THF}$  (50 mL, 50 mmol) or 1.0 M methylmagnesium bromide in  $\text{THF}$  (50 mL, 50 mmol) or 1.0 M phenylmagnesium bromide in  $\text{THF}$  (50 mL, 50 mmol) was added, and the stirring was continued at  $0\text{ }^\circ\text{C}$  for 30 min. Then a solution of the corresponding propargyl carbonate **15** (5 mmol) in anhydrous  $\text{THF}$  (10 mL) was dropwise added. The resulting reaction mixture was stirred at  $0\text{ }^\circ\text{C}$  for 40 min. Next, saturated solution of  $\text{NH}_4\text{Cl}$  (20 mL) was added, and the suspension extracted with diethyl

ether (2 x 40 mL). The organic layers were combined, washed with brine (30 mL) and dried over anhydrous MgSO<sub>4</sub>. The solvent was removed under reduced pressure and the residue was purified by silica gel column chromatography.

**Allene 5a (R<sup>1</sup> = H, R<sup>2</sup> = C(CH<sub>3</sub>)<sub>3</sub>, n = 1):** (hexanes/ethyl acetate 9:1); (1.19 g, 88%); yellow oil;  $\delta_{\text{H}}$  (400 MHz; CD<sub>2</sub>Cl<sub>2</sub>) 1.12 (s, 9H), 3.99-4.13 (m, 4H), 5.58 (d,  $J = 6.4$  Hz, 1H), 5.97 (s, 1H), 6.58 (d,  $J = 6.4$  Hz, 1H), 7.18 (td,  $J = 1.2, 7.6$  Hz, 1H), 7.28 (td,  $J = 1.2, 7.6$  Hz, 1H), 7.47 (dd,  $J = 1.2, 7.6$  Hz, 1H), 7.51 (dd,  $J = 1.2, 7.6$  Hz, 1H) ppm;  $\delta_{\text{C}}$  (100 MHz; CD<sub>2</sub>Cl<sub>2</sub>) 30.5, 33.1 (s), 65.8, 92.9, 102.2, 106.8, 126.8, 126.9, 127.5, 129.5, 134.2 (s), 134.3 (s), 203.7 (s) ppm; IR (Neat):  $\nu_{\text{max}}/\text{cm}^{-1}$  1946, 1602, 1454; HRMS (ESI):  $m/z$  calcd for C<sub>14</sub>H<sub>15</sub>: 183.1168 [M+H-C<sub>2</sub>H<sub>6</sub>O<sub>2</sub>]<sup>+</sup>; found: 183.1172.

**Allene 5b (R<sup>1</sup> = OCH<sub>3</sub>, R<sup>2</sup> = CH<sub>3</sub>, n = 1):** (hexanes/diethyl ether 7:3); (0.69 g, 60%); white oil;  $\delta_{\text{H}}$  (400 MHz; CD<sub>2</sub>Cl<sub>2</sub>) 1.75 (dd,  $J = 3.5, 6.9$  Hz, 3H), 3.77 (s, 3H); 3.97-4.12 (m, 4H), 5.49 (q,  $J = 6.9$  Hz, 1H), 5.93 (s, 1H), 6.38 (br s, 1H), 6.83 (dd,  $J = 3.5, 8.4$  Hz, 1H), 7.07 (d,  $J = 2.7$  Hz, 1H), 7.34 (dd,  $J = 8.4$  Hz, 1H) ppm;  $\delta_{\text{C}}$  (100 MHz; CD<sub>2</sub>Cl<sub>2</sub>) 14.4, 55.8, 65.8, 89.4, 90.3, 101.8, 111.5, 115.6, 126.1 (s), 129.4, 135.7 (s), 159.0 (s), 206.5 (s) ppm; IR (Neat):  $\nu_{\text{max}}/\text{cm}^{-1}$  1941, 1609, 1499; HRMS (ESI):  $m/z$  calcd for C<sub>14</sub>H<sub>17</sub>O<sub>3</sub>: 233.1171 [M+H]<sup>+</sup>, found 233.1172.

**Allene 5c (R<sup>1</sup> = H, R<sup>2</sup> = Ph, n = 1):** (hexanes/ethyl acetate 9:1); (0.63 g, 48%); yellow oil;  $\delta_{\text{H}}$  (300 MHz; CD<sub>2</sub>Cl<sub>2</sub>) 3.96-4.16 (m, 4H), 6.01 (s, 1H), 6.59 (d,  $J = 6.6$  Hz, 1H), 7.01 (d,  $J = 6.6$  Hz, 1H), 7.18-7.36 (m, 7H), 7.46 (dd,  $J = 1.8, 7.5$  Hz, 1H), 7.55 (dd,  $J = 1.8, 7.5$  Hz, 1H) ppm;  $\delta_{\text{C}}$  (75 MHz; CD<sub>2</sub>Cl<sub>2</sub>) 65.8, 95.4, 98.2, 102.3, 127.2, 127.4, 127.7, 127.8, 129.2, 129.7, 132.7 (s), 134.1 (s), 134.7 (s), 208.8 (s) ppm; IR (Neat):  $\nu_{\text{max}}/\text{cm}^{-1}$  1935, 1596, 1490; HRMS (ESI):  $m/z$  calcd for C<sub>18</sub>H<sub>17</sub>O<sub>2</sub>: 265.1228 [M+H]<sup>+</sup>; found: 265.1223.

**Allene 5d (R<sup>1</sup> = H, R<sup>2</sup> = C(CH<sub>3</sub>)<sub>3</sub>, n = 2):** (hexanes/ethyl acetate 9:1); (0.79 g, 62%); white oil;  $\delta_{\text{H}}$  (400 MHz; CD<sub>2</sub>Cl<sub>2</sub>) 1.12 (s, 9H), 1.40-1.44 (m, 1H), 2.12-2.24 (m, 1H), 3.92-3.99 (m, 2H), 4.19-4.22 (m, 2H), 5.57 (d,  $J = 6.4$  Hz, 1H), 5.62 (s, 1H), 6.62 (d,  $J = 6.4$  Hz, 1H), 7.15 (dt,  $J = 1.6, 7.6$  Hz, 1H), 7.24 (dt,  $J = 1.6, 7.6$  Hz, 1H), 7.44-7.49 (m, 2H) ppm;  $\delta_{\text{C}}$  (100 MHz; CD<sub>2</sub>Cl<sub>2</sub>) 26.3, 30.5, 33.1 (s), 68.0, 93.2, 100.9, 106.7, 126.9, 127.1, 129.1, 133.4 (s), 135.4 (s), 203.5 (s) ppm; IR (Neat):  $\nu_{\text{max}}/\text{cm}^{-1}$  1946, 1458, 1376; HRMS (ESI):  $m/z$  calcd for C<sub>14</sub>H<sub>15</sub>: 183.1168 [M+H-C<sub>3</sub>H<sub>8</sub>O<sub>2</sub>]<sup>+</sup>; found 183.1171.

**Allene 5e** ( $R^1 = H$ ,  $R^2 = CH_3$ ,  $n = 2$ ): (hexanes/ethyl acetate 9:1); (0.54 g, 50%); white oil;  $\delta_H$  (300 MHz;  $CD_2Cl_2$ ) 1.39-1.45 (m, 1H), 1.78 (dd,  $J = 3.3, 7.2$  Hz, 3H), 2.10-2.27 (m, 1H), 3.91-4.00 (m, 2H), 4.19-4.24 (m, 2H), 5.53 (quint,  $J = 7.2$  Hz, 1H), 5.62 (s, 1H), 6.51-6.56 (m, 1H), 7.14-7.31 (m, 2H), 7.43 (dd,  $J = 1.6, 7.6$  Hz, 1H), 7.49 (dd,  $J = 1.6, 7.6$  Hz, 1H) ppm;  $\delta_C$  (75 MHz;  $CD_2Cl_2$ ) 14.0, 26.3, 68.0, 89.7, 91.2, 100.9, 127.0, 127.2, 128.0, 129.2, 133.2 (s), 135.6 (s), 207.0 (s) ppm; IR (Neat):  $\nu_{max}/cm^{-1}$  1943, 1456, 1375; HRMS (ESI):  $m/z$  calcd for  $C_{11}H_9$ : 141.0699  $[M+H-C_3H_8O_2]^+$ ; found 141.0703.

### Procedure for the preparation of the propargyl carbonate 16

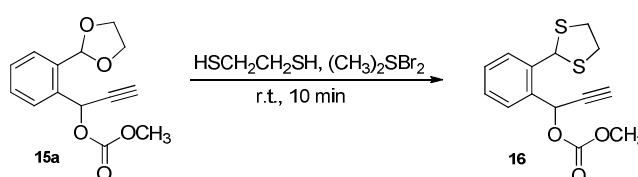

To a mixture of carbonate **15a** (1 mmol) and 1,2-ethanedithiol (1.1 mmol) a catalytic amount of (bromodimethyl)sulfonium bromide was added (0.023 g). After stirring at room temperature for 15 min the reaction mixture was neutralized by addition of two drops of saturated  $NaHCO_3$  solution. Then, the resulting crude material was purified by silica gel column chromatography, using hexanes/diethyl ether (1:1 v/v) as eluent.

**Propargyl carbonate 16**: (0.24 g, 83%); yellow oil;  $\delta_H$  (400 MHz;  $CDCl_3$ ) 2.77 (d,  $J = 2.4$  Hz, 1H), 3.35-3.43 (m, 2H) 3.51-3.59 (m, 2H), 3.82 (s, 3H), 6.12 (s, 1H), 6.60 (d,  $J = 2.4$  Hz, 1H), 7.30 (dt,  $J = 1.6, 7.6$  Hz, 1H), 7.39 (dt,  $J = 1.6, 7.6$  Hz, 1H), 7.56 (dd,  $J = 1.6, 7.6$  Hz, 1H), 7.88 (dd,  $J = 1.6, 7.6$  Hz, 1H) ppm;  $\delta_C$  (100 MHz;  $CDCl_3$ ) 40.5, 52.0, 55.3, 67.0, 77.2, 79.6 (s), 128.4, 128.9, 130.0, 133.9 (s), 138.7 (s), 154.6 (s) ppm; IR (Neat):  $\nu_{max}/cm^{-1}$  3284, 1750, 1440; HRMS (ESI):  $m/z$  calcd for  $C_{14}H_{14}NaO_3S_2$ : 317.0277  $[M+Na]^+$ ; found 317.0274.

### Procedure for preparation of the allene 5g

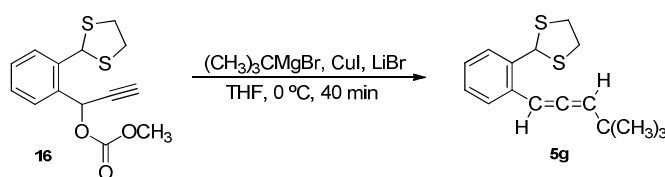

To a 0 °C cooled solution of CuI (9.6 g, 50 mmol) and LiBr (4.34 g, 50 mmol) in anhydrous THF (40 mL), 1.0 M *tert*-butylmagnesium bromide in THF (50 mL, 50 mmol) was added, and the stirring was continued at 0 °C for 30 min. Then a solution of propargyl carbonate **16** (5 mmol) in anhydrous THF (10 mL) was dropwise added. The resulting reaction mixture was stirred at 0 °C for 40 min. Next, a saturated aqueous solution of NH<sub>4</sub>Cl (20 mL) was added, and the suspension extracted with diethyl ether (2 x 40 mL). The organic layers were combined, washed with brine (30 mL) and dried over anhydrous MgSO<sub>4</sub>. The solvent was removed under reduced pressure and the residue was purified by silica gel column chromatography, using hexanes/ethyl acetate (9:1 v/v) as eluent.

**Allene 5g:** (1.20 g, 87%); yellow oil;  $\delta_{\text{H}}$  (400 MHz; CDCl<sub>3</sub>) 1.12 (s, 9H), 3.50-3.51 (m, 4H), 5.58 (d,  $J = 6.4$  Hz, 1H), 6.02 (s, 1H), 6.55 (d,  $J = 6.4$  Hz, 1H), 7.15-7.21 (m, 2H), 7.34-7.38 (m, 1H), 7.77-7.80 (m, 1H) ppm;  $\delta_{\text{C}}$  (100 MHz; CDCl<sub>3</sub>) 30.4, 33.1 (s), 40.4, 40.5, 53.1, 93.3, 106.6, 127.4, 127.9, 128.3, 128.6, 133.6 (s), 137.0 (s), 203.9 (s) ppm; IR (Neat):  $\nu_{\text{max}}/\text{cm}^{-1}$  1946, 1474, 1448; HRMS (ESI):  $m/z$  calcd for C<sub>16</sub>H<sub>21</sub>S<sub>2</sub>: 277.1079 [M+H]<sup>+</sup>; found 277.1080.

### Preparation of 2-(1,3-oxathiolan-2-yl)benzaldehyde **18**

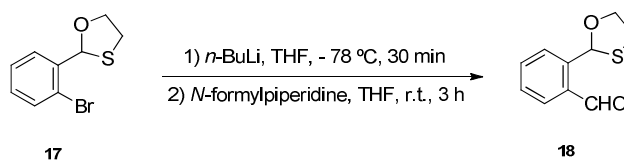

*n*-BuLi [5 mL, 2.5 M in hexane] was added dropwise to a solution of 2-(2-bromophenyl)-1,3-oxathiolane **17** (3 g, 12.2 mmol) in anhydrous THF (50 mL), at -78 °C under an atmosphere of nitrogen. The mixture was stirred at -78 °C for 30 min. Next, a solution of *N*-formylpiperidine (1.4 g, 12.3 mmol) in THF (10 mL) was added. The mixture was stirred at -78 °C for 15 min, warmed to room temperature and the stirring continued for 3 h. Then, the reaction was quenched with the addition of water (25 mL). The mixture was extracted with ethyl acetate (2 x 30 mL). The combined organic layers were washed with water (2 x 100 mL) and dried over anhydrous MgSO<sub>4</sub>. The solvent was removed under reduced pressure and the resulting oil was purified by silica gel column chromatography, using hexanes/diethyl ether (3:2, v/v) as eluent.



**2-(1,3-Oxathiolan-2-yl)benzaldehyde 18:** (2.1 g, 90%); yellow oil;  $\delta_{\text{H}}$  (400 MHz;  $\text{CDCl}_3$ ) 3.17-3.19 (m, 2H), 3.99-4.05 (m, 1H), 4.59-4.64 (m, 1H), 6.75 (s, 1H), 7.49 (t,  $J = 8.0$  Hz, 1H), 7.61 (t,  $J = 8.0$  Hz, 1H), 7.78 (d,  $J = 8.0$  Hz, 1H), 7.82 (d,  $J = 8.0$  Hz, 1H), 10.21 (s, 1H) ppm;  $\delta_{\text{C}}$  (100 MHz;  $\text{CDCl}_3$ ) 33.5, 72.4, 83.1, 126.2, 128.4, 132.6 (s), 133.2, 134.0, 142.0 (s), 192.6 ppm; IR (Neat):  $\nu_{\text{max}}/\text{cm}^{-1}$  1694, 1598, 1570, 1198; HRMS (ESI):  $m/z$  calcd for  $\text{C}_{10}\text{H}_{11}\text{O}_2\text{S}$ : 195.0474  $[\text{M}+\text{H}]^+$ ; found 195.0475.

### Preparation of the propargylic alcohol 19

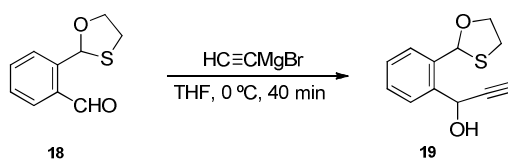

To a solution of 2-(1,3-oxathiolan-2-yl)benzaldehyde **18** (3 mmol) in anhydrous THF (30 mL) at  $0\text{ }^\circ\text{C}$  was added 0.5 M solution of ethynylmagnesium bromide in THF (6 mL, 3 mmol). The reaction mixture was stirred at  $0\text{ }^\circ\text{C}$  for 40 min. Then a saturated aqueous solution of  $\text{NH}_4\text{Cl}$  (10 mL) was added. The mixture was extracted with dichloromethane ( $2 \times 30$  mL). The organic layers were combined, washed with water ( $2 \times 100$  mL) and dried over anhydrous  $\text{MgSO}_4$ . The solvent was removed under reduced pressure and the resulting oil was purified by silica gel column chromatography, using hexanes/diethyl ether (3:2 v/v) as eluent.

**Propargylic alcohol 19:** mixture of diastereoisomers; (0.47 g, 72%); yellow oil;  $\delta_{\text{H}}$  (400 MHz;  $\text{CD}_2\text{Cl}_2$ ) 2.69 (d,  $J = 2.0$  Hz, 1H), 2.72 (d,  $J = 2.0$  Hz, 1H), 2.91-2.92 (m, 1H), 3.03-3.06 (m, 1H), 3.20-3.30 (m, 4H), 3.87-3.94 (m, 2H), 4.55-4.60 (m, 2H), 5.86 (dd,  $J = 2.4, 8.4$  Hz, 1H), 5.89 (dd,  $J = 2.4, 8.4$  Hz, 1H), 6.32 (s, 1H), 6.37 (s, 1H), 7.35-7.38 (m, 4H), 7.54-7.58 (m, 2H), 7.74-7.76 (m, 2H) ppm;  $\delta_{\text{C}}$  (100 MHz;  $\text{CD}_2\text{Cl}_2$ ) 34.4, 34.5, 61.8, 61.9, 72.5, 72.6, 75.3, 75.7, 83.4 (s), 83.7 (s), 85.1, 85.6, 128.2, 128.3, 128.4, 128.8, 129.3, 129.4, 129.5, 129.7, 136.5 (s), 137.0 (s), 138.6 (s), 138.8 (s) ppm; IR (Neat):  $\nu_{\text{max}}/\text{cm}^{-1}$  3405, 3285, 2116, 1375; HRMS (ESI):  $m/z$  calcd for  $\text{C}_{12}\text{H}_{12}\text{NaO}_2\text{S}$ : 243.045  $[\text{M}+\text{Na}]^+$ ; found 243.0446.

## Preparation of the propargylic carbonate **20**

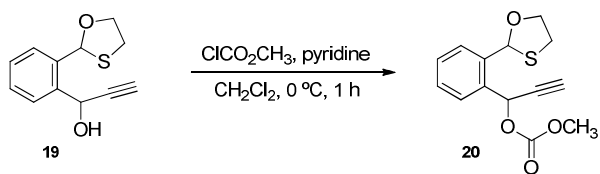

To a solution of the propargylic alcohol **19** (3 mmol) in anhydrous dichloromethane (20 mL), under nitrogen at 0 °C, dry pyridine (0.72 mL, 9 mmol) and methyl chloroformate (0.69 mL, 9 mmol) were added. The resulting mixture was stirred at 0 °C for 1 h. Then, a saturated aqueous solution of NH<sub>4</sub>Cl (20 mL) was added, and the resulting mixture was extracted with dichloromethane (2 × 30 mL). The combined organic layers were washed with water (2 × 50 mL), and dried over anhydrous MgSO<sub>4</sub>. The solvent was removed and the residue was purified by silica gel column chromatography, using hexanes/diethyl ether (3:7 v/v) as eluent.

**Propargyl carbonate 20:** mixture of diastereoisomers; (0.71 g, 85%); yellow oil;  $\delta_{\text{H}}$  (300 MHz; CDCl<sub>3</sub>) 2.70 (d,  $J = 2.4$  Hz, 1H), 2.75 (d,  $J = 2.4$  Hz, 1H), 3.18-3.26 (m, 2H), 3.28-3.38 (m, 2H), 3.80 (s, 3H), 3.82 (s, 3H), 3.86-3.97 (m, 2H), 4.54-4.66 (m, 2H), 6.25 (s, 1H), 6.40 (s, 1H), 6.61 (d,  $J = 2.1$  Hz, 1H), 6.70 (d,  $J = 2.1$  Hz, 1H), 7.36-7.42 (m, 4H), 7.60-7.66 (m, 2H), 7.73-7.76 (m, 1H) ppm;  $\delta_{\text{C}}$  (75 MHz; CDCl<sub>3</sub>) 34.0, 34.2, 55.1, 55.2, 66.0, 66.1, 72.1, 76.3, 76.9, 79.7 (s), 79.9 (s), 84.1, 84.7, 127.6, 128.2, 128.8, 129.0, 129.1, 129.2, 129.6, 129.7, 133.5 (s), 133.7 (s), 136.7 (s), 136.8 (s), 154.6 (s), 154.7 (s) ppm; IR (Neat):  $\nu_{\text{max}}/\text{cm}^{-1}$  1750, 1441, 1314; HRMS (ESI):  $m/z$  calcd for C<sub>14</sub>H<sub>14</sub>NaO<sub>4</sub>S: 301.0505 [M+Na]<sup>+</sup>; found 301.0504.

## Preparation of the allene **5f**

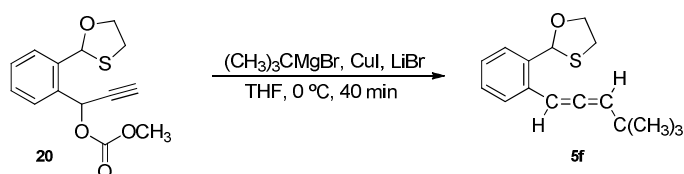

To a 0 °C cooled solution of CuI (9.6 g, 50 mmol) and LiBr (4.34 g, 50 mmol) in anhydrous THF (40 mL), 1.0 M *tert*-butylmagnesium bromide in THF (50 mL, 50 mmol) was added, and the stirring was continued at 0 °C for 30 min. Then a solution of the propargyl carbonate **20** (5 mmol) in anhydrous THF (10 mL) was dropwise added. The reaction mixture was stirred at 0 °C for 40 min. Next, a saturated aqueous solution of NH<sub>4</sub>Cl (20 mL) was added and the

suspension extracted with diethyl ether (2 x 40 mL). The organic layers were combined, washed with brine (30 mL) and dried over anhydrous MgSO<sub>4</sub>. The solvent was removed under reduced pressure and the residue was purified by silica gel column chromatography, using hexanes/ethyl acetate (9:1 v/v) as eluent.

**Allene 5f:** (0.89 g, 68%); yellow oil;  $\delta_{\text{H}}$  (300 MHz; CD<sub>2</sub>Cl<sub>2</sub>) 1.12 (s, 9H), 3.21-3.28 (m, 2H), 3.89-3.97 (m, 1H), 4.55-4.6 (m, 1H), 5.57-5.60 (m, 1H), 6.29 (s, 1H), 6.44 (d,  $J = 6.3$  Hz, 1H), 7.17-7.26 (m, 2H), 7.39-7.44 (m, 1H), 7.55-7.58 (m, 1H) ppm;  $\delta_{\text{C}}$  (75 MHz; CD<sub>2</sub>Cl<sub>2</sub>) 30.5, 33.2 (s), 34.5, 34.6, 72.5, 84.8, 84.9, 92.8, 93.0, 106.7, 106.9, 126.4, 126.5, 127.3, 127.5, 127.7, 128.7, 133.0 (s), 136.1 (s), 136.3 (s), 203.9 (s) ppm; IR (Neat):  $\nu_{\text{max}}/\text{cm}^{-1}$  1946, 1474, 1448; HRMS (ESI):  $m/z$  calcd for C<sub>16</sub>H<sub>21</sub>OS: 261.1308 [M+H]<sup>+</sup>; found 261.1310.

### Preparation of the propargylic alcohol 22

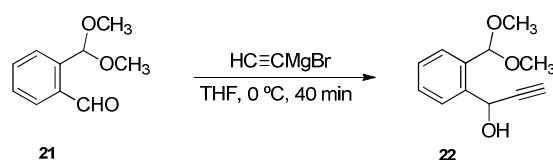

To a solution of 2-(dimethoxymethyl)benzaldehyde **21** (3 mmol) in anhydrous THF (30 mL) at 0 °C was added 0.5 M solution of ethynylmagnesium bromide in THF (6 mL, 3 mmol). The reaction was stirred for 40 min at 0 °C. Then a saturated aqueous solution of NH<sub>4</sub>Cl (10 mL) was added. The mixture was extracted with dichloromethane (2 × 30 mL). The organic layers were combined, washed with water (2 × 100 mL) and dried over anhydrous MgSO<sub>4</sub>. The solvent was removed under reduced pressure and the resulting oil was purified by silica gel column chromatography, using hexanes/diethyl ether (3:2 v/v) as eluent.

**Propargylic alcohol 22:** (0.34 g, 54%); yellow oil;  $\delta_{\text{H}}$  (400 MHz; CD<sub>2</sub>Cl<sub>2</sub>) 2.70 (s, 1H), 3.38 (s, 3H), 3.39 (s, 3H), 3.68 (s, 1H), 5.66 (s, 1H), 5.89 (s, 1H), 7.38-7.44 (m, 2H), 7.53-7.55 (m, 1H), 7.77-7.79 (m, 1H) ppm;  $\delta_{\text{C}}$  (100 MHz; CD<sub>2</sub>Cl<sub>2</sub>) 54.3, 54.4, 62.2, 74.8, 84.1 (s), 103.9, 128.3, 128.7, 128.8, 129.7, 135.8 (s), 139.1 (s) ppm; IR (Neat):  $\nu_{\text{max}}/\text{cm}^{-1}$  3403, 2937, 2115, 1454; HRMS (ESI):  $m/z$  calcd for C<sub>12</sub>H<sub>14</sub>NaO<sub>3</sub>: 229.0835 [M+Na]<sup>+</sup>; found 229.0830.

## Preparation of the propargyl carbonate **23**

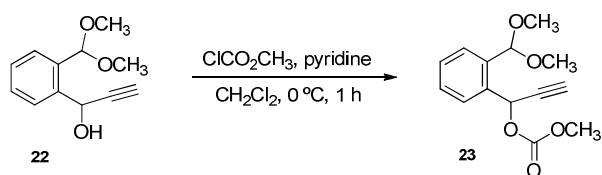

To a solution of the propargylic alcohol **22** (3 mmol) in anhydrous dichloromethane (20 mL), under nitrogen at 0 °C, dry pyridine (0.72 mL, 9 mmol) and methyl chloroformate (0.69 mL, 9 mmol) were added. The resulting mixture was stirred at 0 °C for 1 h. Then, a saturated aqueous solution of NH<sub>4</sub>Cl (20 mL) was added, and the resulting mixture was extracted with dichloromethane (2 × 30 mL). The combined organic layers were washed with water (2 × 50 mL), and dried over anhydrous MgSO<sub>4</sub>. The solvent was removed under reduce pressure and the residue was purified by silica gel column chromatography, using hexanes/diethyl ether (1:1 v/v) as eluent.

**Propargyl carbonate 23:** (0.52 g, 66%); yellow oil;  $\delta_{\text{H}}$  (300 MHz; CDCl<sub>3</sub>) 2.67 (d,  $J = 2.1$  Hz, 1H), 3.28 (s, 3H), 3.37 (s, 3H), 3.80 (s, 3H), 5.60 (s, 1H), 6.74 (d,  $J = 2.4$  Hz, 1H), 7.35-7.43 (m, 2H), 7.56-7.59 (m, 1H), 7.73-7.76 (m, 1H) ppm;  $\delta_{\text{C}}$  (75 MHz; CDCl<sub>3</sub>) 52.8, 53.9, 55.1, 65.8, 75.9, 80.1 (s), 101.6, 127.4, 128.5, 128.9, 129.2, 134.3 (s), 135.6 (s), 154.7 (s) ppm; IR (Neat):  $\nu_{\text{max}}/\text{cm}^{-1}$  3286, 1754, 1442; HRMS (ESI):  $m/z$  calcd for C<sub>13</sub>H<sub>13</sub>O<sub>4</sub>: 233.0808 [M+H-CH<sub>4</sub>O]<sup>+</sup>; found 233.0812.

## Preparation of the allene **5h**

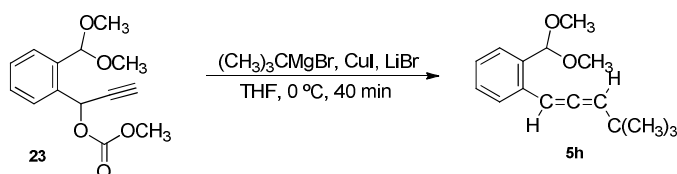

To a 0 °C cooled solution of CuI (9.6 g, 50 mmol) and LiBr (4.34 g, 50 mmol) in anhydrous THF (40 mL), 1.0 M *tert*-butylmagnesium bromide in THF (50 mL, 50 mmol) was added, and the stirring was continued at 0 °C for 30 min. Then a solution of the propargyl carbonate **23** (5 mmol) in anhydrous THF (10 mL) was dropwise added. The reaction mixture was stirred at 0 °C for 40 min. Next, a saturated aqueous solution of NH<sub>4</sub>Cl (20 mL) was added and the

suspension extracted with diethyl ether (2 x 40 mL). The organic layers were combined, washed with brine (30 mL) and dried over anhydrous MgSO<sub>4</sub>. The solvent was removed under reduced pressure and the residue was purified by silica gel column chromatography, using hexanes/ ethyl acetate (9:1 v/v) as eluent.

**Allene 5h:** (0.89 g, 73%); white oil;  $\delta_{\text{H}}$  (300 MHz; CD<sub>2</sub>Cl<sub>2</sub>) 1.10 (s, 9H), 3.29 (s, 3H), 3.30 (s, 3H), 5.47 (s, 1H), 5.56 (d,  $J = 6.6$  Hz, 1H), 6.61 (d,  $J = 6.6$  Hz, 1H), 7.16 (td,  $J = 1.2, 7.5$  Hz, 1H), 7.25 (td,  $J = 1.2, 7.5$  Hz, 1H), 7.46-7.48 (m, 2H) ppm;  $\delta_{\text{C}}$  (75 MHz; CD<sub>2</sub>Cl<sub>2</sub>) 30.5, 33.1 (s), 53.6, 93.1, 102.6, 106.6, 126.6, 127.5, 127.7, 129.0, 133.9 (s), 134.6 (s), 203.6 (s) ppm; IR (Neat):  $\nu_{\text{max}}/\text{cm}^{-1}$  1947, 1453, 1361; HRMS (ESI):  $m/z$  calcd for C<sub>14</sub>H<sub>15</sub>: 183.1168 [M+H-C<sub>2</sub>H<sub>8</sub>O<sub>2</sub>]<sup>+</sup>; found 183.1172.

### Preparation of the propargyl carbonate 24

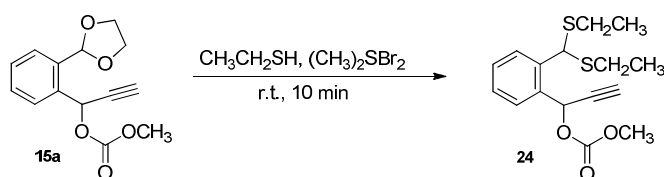

To a mixture of the carbonate **15a** (1 mmol) and ethanethiol (2.2 mmol) a catalytic amount of (bromodimethyl)sulfonium bromide was added (0.023 g). After stirring at room temperature for 15 min the reaction mixture was neutralized by addition of two drops of saturated NaHCO<sub>3</sub> solution. Then, the resulting crude material was purified by silica gel column chromatography, using hexanes/diethyl ether (1:1 v/v) as eluent.

**Propargyl carbonate 24:** (0.28 g, 87%); yellow oil;  $\delta_{\text{H}}$  (400 MHz; CDCl<sub>3</sub>) 1.21 (t,  $J = 7.2$  Hz, 3H), 1.23 (t,  $J = 7.2$  Hz, 3H), 2.51-2.71 (m, 4H), 2.72 (d,  $J = 2.4$  Hz, 1H), 3.81 (s, 3H), 5.37 (s, 1H), 6.66 (d,  $J = 2.4$  Hz, 1H), 7.31 (dt,  $J = 1.2, 7.6$  Hz, 1H), 7.39 (dt,  $J = 1.2, 7.6$  Hz, 1H), 7.64 (dd,  $J = 1.6, 7.6$  Hz, 1H), 7.80 (d,  $J = 7.6$  Hz, 1H) ppm;  $\delta_{\text{C}}$  (100 MHz; CDCl<sub>3</sub>) 14.3, 14.4, 26.5, 26.6, 48.3, 55.3, 66.4, 76.7, 79.6 (s), 128.2, 128.7, 129.0, 129.8, 133.0 (s), 138.3 (s), 154.7 (s) ppm; IR (Neat):  $\nu_{\text{max}}/\text{cm}^{-1}$  3285, 1751, 1441; HRMS (ESI):  $m/z$  calcd for C<sub>16</sub>H<sub>20</sub>NaO<sub>3</sub>S<sub>2</sub>: 347.0746 [M+Na]<sup>+</sup>; found 347.0741.

## Preparation of the allene **5i**

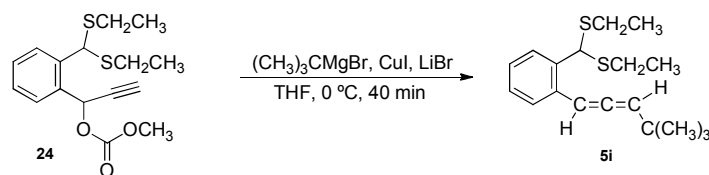

To a 0 °C cooled solution of CuI (9.6 g, 50 mmol) and LiBr (4.34 g, 50 mmol) in anhydrous THF (40 mL), 1.0 M *tert*-butylmagnesium bromide in THF (50 mL, 50 mmol) was added, and the stirring was continued at 0 °C for 30 min. Then a solution of the propargyl carbonate **24** (5 mmol) in anhydrous THF (10 mL) was dropwise added. The reaction mixture was stirred at 0 °C for 40 min. Next, saturated solution of NH<sub>4</sub>Cl (20 mL) was added and the suspension extracted with diethyl ether (2 x 40 mL). The organic layers were combined, washed with brine (30 mL) and dried over anhydrous MgSO<sub>4</sub>. The solvent was removed under reduced pressure and the residue was purified by silica gel column chromatography, using hexanes/ethyl acetate (9:1 v/v) as eluent.

**Allene 5i:** (0.78 g, 60%); yellow oil;  $\delta_{\text{H}}$  (400 MHz; CD<sub>2</sub>Cl<sub>2</sub>) 1.11 (s, 9H), 1.19 (t,  $J = 7.2$  Hz, 3H), 1.20 (t,  $J = 7.2$  Hz, 3H), 2.24-2.64 (m, 4H), 5.29 (s, 1H), 5.57 (d,  $J = 6.4$  Hz, 1H), 6.58 (d,  $J = 6.4$  Hz, 1H), 7.15-7.21 (m, 2H), 7.38-7.40 (m, 1H), 7.59-7.61 (m, 1H) ppm;  $\delta_{\text{C}}$  (100 MHz; CD<sub>2</sub>Cl<sub>2</sub>) 14.7, 14.8, 26.8, 26.9, 30.4, 33.1 (s), 49.3, 92.9, 106.6, 127.3, 128.1, 128.2, 129.0, 133.3 (s), 137.0 (s), 203.9 (s) ppm; IR (Neat):  $\nu_{\text{max}}/\text{cm}^{-1}$  1946, 1474, 1447; HRMS (ESI):  $m/z$  calcd for C<sub>16</sub>H<sub>21</sub>S: 245.1358 [M+H-C<sub>2</sub>H<sub>6</sub>S]<sup>+</sup>; found 245.1360.

## Preparation of the propargylic alcohol **25**

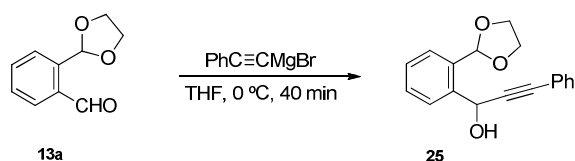

To a solution of 2-(1,3-dioxolan-2-yl)benzaldehyde **13a** (3 mmol) in anhydrous THF (30 mL) at 0 °C was added 0.5 M solution of phenylethynylmagnesium bromide in THF (6 mL, 3 mmol). The reaction was stirred for 40 min at 0 °C. Then a saturated aqueous solution of NH<sub>4</sub>Cl (10 mL) was added. The mixture was extracted with dichloromethane (2 x 30 mL).

The organic layers were combined, washed with water (2 × 100 mL) and dried over anhydrous MgSO<sub>4</sub>. The solvent was removed under reduced pressure and the resulting oil was purified by silica gel column chromatography, using hexanes/diethyl ether (2:3 v/v) as eluent.

**Propargylic alcohol 25:** (0.48 g, 57%); yellow oil;  $\delta_{\text{H}}$  (300 MHz; CD<sub>2</sub>Cl<sub>2</sub>) 4.05-4.19 (m, 5H), 6.02 (s, 1H), 6.19 (s, 1H), 7.32-7.52 (m, 7H), 7.58-7.61 (m, 1H), 7.83-7.86 (m, 1H) ppm;  $\delta_{\text{C}}$  (75 MHz; CD<sub>2</sub>Cl<sub>2</sub>) 62.8, 65.6, 65.7, 86.7 (s), 88.9 (s), 102.9, 123.1 (s), 127.8, 128.9, 129.0, 129.1, 130.2, 132.1, 135.1 (s), 140.1 (s) ppm; IR (Neat):  $\nu_{\text{max}}/\text{cm}^{-1}$  3439, 1489, 1454, 1406; HRMS (ESI):  $m/z$  calcd for C<sub>18</sub>H<sub>17</sub>O<sub>3</sub>: 281.1172 [M+H]<sup>+</sup>; found: 281.1176.

### Preparation of the propargyl carbonate 26

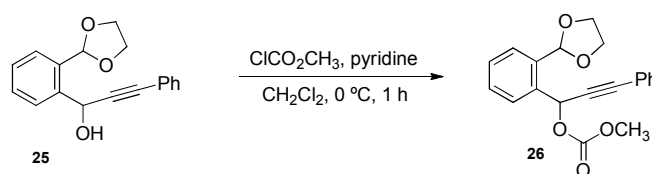

To a solution of the propargylic alcohol **25** (3 mmol) in anhydrous dichloromethane (20 mL), under nitrogen at 0 °C, dry pyridine (0.72 mL, 9 mmol) and methyl chloroformate (0.69 mL, 9 mmol) were added. The resulting mixture was stirred at 0 °C for 1 h. Then, a saturated aqueous solution of NH<sub>4</sub>Cl (20 mL) was added and the resulting mixture was extracted with dichloromethane (2 × 30 mL). The combined organic layers were washed with water (2 × 50 mL), and dried over anhydrous MgSO<sub>4</sub>. The solvent was removed under reduce pressure and the residue was purified by silica gel column chromatography, using hexanes/diethyl ether (3:2 v/v) as eluent.

**Propargyl carbonate 26:** (0.61, 60%); yellow oil;  $\delta_{\text{H}}$  (300 MHz; CDCl<sub>3</sub>) 3.82 (s, 3H), 4.22-4.30 (m, 4H), 6.13 (s, 1H), 6.98 (s, 1H), 7.27-7.33 (m, 3H), 7.38-7.48 (m, 4H), 7.60 (dd,  $J=1.8, 7.2$  Hz, 1H), 7.85 (dd,  $J=1.8, 7.2$  Hz, 1H) ppm;  $\delta_{\text{C}}$  (75 MHz; CDCl<sub>3</sub>) 54.9, 65.2, 66.6, 85.1 (s), 87.8 (s), 101.7, 122.0, 126.9, 128.1, 128.7, 128.9, 129.1, 129.5, 131.8, 134.9 (s), 135.0 (s), 154.7 (s) ppm; IR (Neat):  $\nu_{\text{max}}/\text{cm}^{-1}$  1750, 1441, 1263; HRMS (ESI):  $m/z$  calcd for C<sub>20</sub>H<sub>18</sub>NaO<sub>5</sub>: 361.1046 [M+Na]<sup>+</sup>; found: 361.1043.

## General procedure for the preparation of the propargyl carbonates **27**

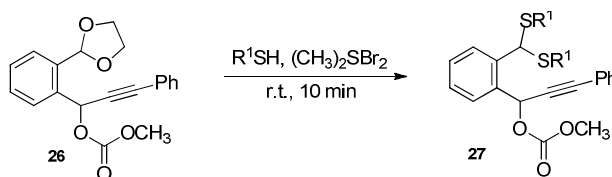

To a mixture of propargyl carbonate **26** (1 mmol) and ethanethiol (2.2 mmol) or 2-phenylethanethiol (2.2 mmol) or (4-chlorophenyl)methanethiol (2.2 mmol) or (4-bromophenyl)methanethiol (2.2 mmol) a catalytic amount of (bromodimethyl)sulfonium bromide was added (0.023 g). After stirring at room temperature for 15 min the reaction mixture was neutralized by addition of two drops of saturated  $\text{NaHCO}_3$  solution. Then, the resulting crude material was purified by silica gel column chromatography.

**Propargyl carbonate 27a** ( $\text{R}^1 = \text{CH}_3\text{CH}_2$ ): (hexanes/diethyl ether 2:3); (0.30 g, 76%); yellow oil;  $\delta_{\text{H}}$  (300 MHz;  $\text{CDCl}_3$ ) 1.18 (t,  $J = 7.5$  Hz, 3H), 1.21 (t,  $J = 7.5$  Hz, 3H); 2.54-2.73 (m, 4H), 3.83 (s, 3H), 5.50 (s, 1H), 6.86 (s, 1H), 7.30-7.35 (m, 4H), 7.40 (td,  $J = 1.8, 7.5$  Hz, 1H), 7.45-7.48 (m, 2H), 7.67 (dd,  $J = 1.5, 7.8$  Hz, 1H), 7.84 (dd,  $J = 1.5, 7.8$  Hz, 1H) ppm;  $\delta_{\text{C}}$  (75 MHz;  $\text{CDCl}_3$ ) 14.2, 14.4, 26.6, 26.7, 48.5, 55.2, 67.6, 84.9 (s), 88.4 (s), 121.9 (s), 128.1, 128.3, 128.7, 129.0, 129.2, 129.6, 131.9, 133.6 (s), 138.7 (s), 154.8 (s) ppm; IR (Neat):  $\nu_{\text{max}}/\text{cm}^{-1}$  1752, 1490, 1441; HRMS (ESI):  $m/z$  calcd for  $\text{C}_{22}\text{H}_{24}\text{KO}_3\text{S}_2$ : 439.0798  $[\text{M}+\text{K}]^+$ ; found 439.0793.

**Propargyl carbonate 27b** ( $\text{R}^1 = \text{PhCH}_2\text{CH}_2$ ): (hexanes/diethyl ether 3:2); (0.35 g, 63%); yellow oil;  $\delta_{\text{H}}$  (400 MHz;  $\text{CDCl}_3$ ) 2.77-2.87 (m, 8H), 3.73 (s, 3H), 5.85 (s, 1H), 6.82 (s, 1H), 7.05-7.46 (m, 17H), 7.66 (dd,  $J = 1.2, 7.6$  Hz, 1H), 7.82 (d,  $J = 7.6$  Hz, 1H) ppm;  $\delta_{\text{C}}$  (100 MHz;  $\text{CDCl}_3$ ) 34.7, 34.9, 36.5, 36.6, 50.4, 56.0, 68.6, 85.7 (s), 89.4 (s), 122.7 (s), 127.1, 129.1, 129.2, 129.3, 129.4, 129.8, 130.1, 130.6, 132.8 (s), 139.3 (s), 141.2 (s), 141.3 (s), 155.6 (s) ppm; IR (Neat):  $\nu_{\text{max}}/\text{cm}^{-1}$  1751, 1491, 1453; HRMS (ESI):  $m/z$  calcd for  $\text{C}_{34}\text{H}_{32}\text{NaO}_3\text{S}_2$ : 575.1685  $[\text{M}+\text{Na}]^+$ ; found 575.1680.

**Propargyl carbonate 27c** ( $\text{R}^1 = 4\text{-Cl-C}_6\text{H}_4\text{-CH}_2$ ): (hexanes/diethyl ether 3:2); (0.41 g, 70%); yellow oil;  $\delta_{\text{H}}$  (300 MHz;  $\text{CDCl}_3$ ) 3.61-3.79 (m, 4H), 3.80 (s, 3H), 5.15 (s, 1H), 6.49 (s, 1H), 7.06-7.24 (m, 8H), 7.29-7.43 (m, 7H), 7.64-7.67 (m, 1H), 7.78-7.79 (m, 1H) ppm;  $\delta_{\text{C}}$  (75



MHz; CDCl<sub>3</sub>) 36.2, 36.3, 48.4, 55.3, 66.9, 84.9 (s), 88.1 (s), 121.8 (s), 128.4, 128.6, 128.7, 128.8, 129.1, 129.2, 129.6, 130.3, 130.4, 132.0, 132.9 (s), 133.0 (s), 134.5 (s), 135.7 (s), 135.8 (s), 136.5 (s), 154.4 (s) ppm; IR (Neat):  $\nu_{\max}/\text{cm}^{-1}$  1754, 1489, 1440; HRMS (ESI):  $m/z$  calcd for C<sub>32</sub>H<sub>26</sub>Cl<sub>2</sub>KO<sub>3</sub>S<sub>2</sub>: 631.0332 [M+K]<sup>+</sup>; found 631.0342.

**Propargyl carbonate 27d** (**R**<sup>1</sup> = **4-Br-C<sub>6</sub>H<sub>4</sub>-CH<sub>2</sub>**): (hexanes/diethyl ether 3:2); (0.41 g, 60%); yellow oil;  $\delta_{\text{H}}$  (300 MHz; CDCl<sub>3</sub>) 3.55-3.77 (m, 4H), 3.81 (s, 3H), 5.17 (s, 1H), 6.49 (s, 1H), 7.00-7.77 (m, 17H) ppm;  $\delta_{\text{C}}$  (75 MHz; CDCl<sub>3</sub>) 36.3, 36.4, 48.5, 55.3, 67.0, 85.0 (s), 88.2 (s), 121.0 (s), 121.8 (s), 128.4, 128.5, 128.6, 128.8, 129.1, 129.6, 130.6, 130.7, 130.8, 131.1, 131.6, 132.0, 134.5 (s), 136.2 (s), 136.3 (s), 136.5 (s), 154.4 (s) pm; IR (Neat):  $\nu_{\max}/\text{cm}^{-1}$  1753, 1486, 1440; HRMS (ESI):  $m/z$  calcd for C<sub>30</sub>H<sub>23</sub>Br<sub>2</sub>S<sub>2</sub>: 606.9764 [M+H-C<sub>2</sub>H<sub>4</sub>O<sub>3</sub>]<sup>+</sup>; found 606.9524.

### General procedure for the preparation of the allenes 5j-m

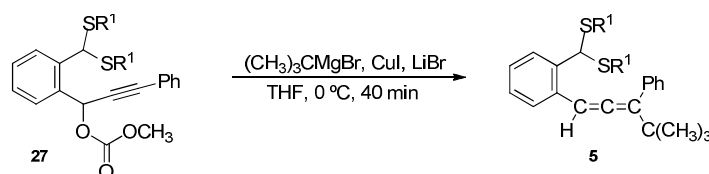

To a 0 °C cooled solution of CuI (9.6 g, 50 mmol) and LiBr (4.34 g, 50 mmol) in anhydrous THF (40 mL), 1.0 M *tert*-butylmagnesium bromide in THF (50 mL, 50 mmol) was added, and the stirring was continued at 0 °C for 30 min. Then a solution of the propargyl carbonate **27** (5 mmol) in anhydrous THF (10 mL) was dropwise added. The reaction mixture was stirred at 0 °C for 40 min. Next, a saturated aqueous solution of NH<sub>4</sub>Cl (20 mL) was added and the suspension extracted with diethyl ether (2 x 40 mL). The organic layers were combined, washed with brine (30 mL) and dried over anhydrous MgSO<sub>4</sub>. The solvent was removed under reduced pressure and the residue was purified by silica gel column chromatography.

**Allene 5j** (**R**<sup>1</sup> = **CH<sub>3</sub>CH<sub>2</sub>**): (hexanes/ ethyl acetate 9:1); (0.68 g, 36%); yellow oil;  $\delta_{\text{H}}$  (400 MHz; CD<sub>2</sub>Cl<sub>2</sub>) 1.13 (t,  $J$  = 7.2 Hz, 3H), 1.18 (t,  $J$  = 7.2 Hz, 3H), 1.20 (s, 9H), 2.41-2.57 (m, 4H), 6.64 (s, 1H), 7.17-7.28 (m, 4H), 7.29-7.34 (m, 4H), 7.47 (dd,  $J$  = 1.6, 7.2 Hz, 1H), 7.59 (d,  $J$  = 7.6 Hz, 1H) ppm;  $\delta_{\text{C}}$  (100 MHz; CD<sub>2</sub>Cl<sub>2</sub>) 14.7, 14.8, 26.8, 26.9, 30.1, 35.6 (s), 91.8, 119.6 (s), 127.4, 127.5, 128.0, 128.3, 128.4, 129.1, 129.9, 133.5 (s), 137.1 (s), 137.5 (s), 204.3

(s) ppm; IR (Neat):  $\nu_{\max}/\text{cm}^{-1}$  1944, 1596, 1476; HRMS (ESI):  $m/z$  calcd for  $\text{C}_{24}\text{H}_{30}\text{KS}_2$ : 421.1421  $[\text{M}+\text{K}]^+$ ; found 421.1419.

**Allene 5k** ( $\text{R}^1 = \text{PhCH}_2\text{CH}_2$ ): (hexanes/ethyl acetate 95:5); (1.76 g, 66%); colorless oil;  $\delta_{\text{H}}$  (400 MHz;  $\text{CD}_2\text{Cl}_2$ ) 1.24 (s, 9H), 2.73-2.85 (m, 8H), 5.21 (s, 1H), 6.54 (s, 1H), 7.09-7.39 (m, 17H), 7.55 (dd,  $J = 1.4, 7.6$  Hz, 1H), 7.60 (dd,  $J = 7.4$  Hz, 1H) ppm;  $\delta_{\text{C}}$  (100 MHz;  $\text{CD}_2\text{Cl}_2$ ) 30.1, 34.2, 34.3, 35.7 (s), 36.4, 91.8, 119.7 (s), 126.7, 126.8, 127.4, 127.5, 127.9, 128.5, 128.8, 128.9, 129.0, 129.1, 129.2, 129.9, 133.5 (s), 136.7 (s), 137.5 (s), 140.9 (s), 141.0 (s), 204.3 (s) ppm; IR (Neat):  $\nu_{\max}/\text{cm}^{-1}$  1944, 1597, 1494; HRMS (ESI):  $m/z$  calcd for  $\text{C}_{36}\text{H}_{38}\text{KS}_2$ : 573.2047  $[\text{M}+\text{K}]^+$ ; found 573.2047.

**Allene 5l** ( $\text{R}^1 = 4\text{-Cl-C}_6\text{H}_4\text{-CH}_2$ ): (hexanes/ ethyl acetate 9:1); (1.20 g, 42%); yellow oil;  $\delta_{\text{H}}$  (300 MHz;  $\text{CD}_2\text{Cl}_2$ ) 1.17 (s, 9H), 3.26 (d,  $J = 13.8$  Hz, 1H), 3.46 (d,  $J = 13.8$  Hz, 1H), 3.53 (d,  $J = 13.8$  Hz, 1H), 3.69 (d,  $J = 13.8$  Hz, 1H), 4.43 (s, 1H), 5.17 (s, 1H), 6.76-6.79 (m, 2H), 6.84-6.90 (m, 4H), 7.16-7.38 (m, 10H), 7.45 (dd,  $J = 2.4, 6.9$  Hz, 1H), 7.79 (d,  $J = 7.2$  Hz, 1H) ppm;  $\delta_{\text{C}}$  (75 MHz;  $\text{CD}_2\text{Cl}_2$ ) 30.1, 35.6 (s), 36.5, 36.7, 45.9, 90.2, 119.6 (s), 127.6, 127.8, 128.6, 128.7, 128.8, 129.1, 129.2, 130.0, 130.5, 130.9, 133.1 (s), 133.3 (s), 134.4 (s), 137.5 (s), 137.4 (s), 137.7 (s), 203.8 (s) ppm; IR (Neat):  $\nu_{\max}/\text{cm}^{-1}$  1945, 1595, 1489; HRMS (ESI):  $m/z$  calcd for  $\text{C}_{34}\text{H}_{33}\text{Cl}_2\text{S}_2$ : 575.1395  $[\text{M}+\text{H}]^+$ ; found 575.1396.

**Allene 5m** ( $\text{R}^1 = 4\text{-Br-C}_6\text{H}_4\text{-CH}_2$ ): (hexanes/ ethyl acetate 9:1); (1.39 g, 42%); yellow oil;  $\delta_{\text{H}}$  (300 MHz;  $\text{CD}_2\text{Cl}_2$ ) 1.20 (s, 9H), 3.21 (d,  $J = 12.0$  Hz, 1H), 3.44 (d,  $J = 12.0$  Hz, 1H), 3.48 (d,  $J = 12.0$  Hz, 1H), 3.64 (d,  $J = 12.0$  Hz, 1H), 4.43 (s, 1H), 5.14 (s, 1H), 6.69 (d,  $J = 8.4$  Hz, 2H), 6.78 (d,  $J = 8.4$  Hz, 2H), 6.97 (d,  $J = 8.4$  Hz, 3H), 7.19-7.47 (m, 8H), 7.83 (m, 2H) ppm;  $\delta_{\text{C}}$  (75 MHz;  $\text{CD}_2\text{Cl}_2$ ) 29.9, 35.2 (s), 36.0, 36.3, 45.1, 89.7, 119.0 (s), 120.9 (s), 121.0 (s), 127.1, 127.3, 128.1, 128.2, 128.3, 129.5, 130.7, 131.6, 131.7, 133.7, 136.9 (s), 137.1 (s), 137.2 (s), 203.3 (s) ppm; IR (Neat):  $\nu_{\max}/\text{cm}^{-1}$  1946, 1596, 1485; HRMS (ESI):  $m/z$  calcd for  $\text{C}_{34}\text{H}_{33}\text{Br}_2\text{S}_2$ : 663.0385  $[\text{M}+\text{H}]^+$ , found 663.0386.

### Acid-triggered cyclization of acetallic allenes **5**

**Conditions A:** To a solution of the appropriate allene **5** (1 mmol) in dichloromethane (10 mL) at room temperature silver hexafluoroantimonate(V) (0.1 equivalent) was added. The reaction mixture was stirred at room temperature for 20 min. Then, the solution was filtrated

through Celite<sup>®</sup> and the solvent was removed under reduced pressure. Finally, the residue was purified by column chromatography on silica gel.

**Conditions B:** To a solution of the allene **5** (1 mmol) in dichloromethane (10 mL) at room temperature trifluoroacetic acid (1 mmol) was added. The reaction mixture was stirred at room temperature for 10 min. Then, saturated NaHCO<sub>3</sub> solution (10 mL) was added. After separation of the organic phase the aqueous one was extracted with dichloromethane (2 x 15 mL). The organic layers were combined, washed with brine (30 mL) and dried over anhydrous MgSO<sub>4</sub>. The solvent was removed under reduced pressure and the residue was purified column chromatography on silica gel.

**Indene-1,4-dioxepane *trans*-6a** (**R**<sup>1</sup> = **H**, **R**<sup>2</sup> = **C(CH<sub>3</sub>)<sub>3</sub>**, **n** = **1**): *conditions A*; (hexanes/ethyl acetate 9:1); (0.15 g, 62%); colorless prism; mp 108-110 °C (from diethyl ether);  $\delta_{\text{H}}$  (300 MHz; CDCl<sub>3</sub>) 0.96 (s, 9H), 3.65-3.71 (m, 1H), 3.96-4.06 (m, 3H), 4.19 (s, 1H), 5.00 (s, 1H), 6.51 (s, 1H), 7.14-7.19 (m, 2H), 7.23-7.28 (m, 1H), 7.41-7.43 (m, 1H) ppm;  $\delta_{\text{C}}$  (75 MHz; CDCl<sub>3</sub>) 26.5, 36.8 (s), 72.3, 72.7, 85.0, 87.6, 120.7, 124.1, 125.9, 128.8, 130.3, 142.5 (s), 143.2 (s), 151.9 (s) ppm; IR (Nujol):  $\nu_{\text{max}}/\text{cm}^{-1}$  1610, 1358, 1283; HRMS (ESI):  $m/z$  calcd for C<sub>14</sub>H<sub>15</sub>: 183.1168 [M+H-C<sub>2</sub>H<sub>6</sub>O<sub>2</sub>]<sup>+</sup>; found 183.1171.

**Indene-1,4-dioxepane *cis*-6a** (**R**<sup>1</sup> = **H**, **R**<sup>2</sup> = **C(CH<sub>3</sub>)<sub>3</sub>**, **n** = **1**): *see Table 1*; (hexanes/ethyl acetate 9:1); mp 106-108 °C (from diethyl ether);  $\delta_{\text{H}}$  (400 MHz; CDCl<sub>3</sub>) 1.14 (s, 9H), 3.11 (dd,  $J$  = 10.0, 13.6 Hz, 1H), 3.51-3.55 (m, 1H), 3.62-3.68 (m, 1H), 3.82-3.86 (m, 2H), 5.08 (s, 1H), 6.87 (s, 1H), 7.19-7.31 (m, 3H), 7.50 (d,  $J$  = 7.2 Hz, 1H) ppm;  $\delta_{\text{C}}$  (100 MHz; CDCl<sub>3</sub>) 27.1, 34.9 (s), 67.6, 72.0, 82.7, 86.7, 121.4, 123.6, 125.8, 128.7, 128.9, 142.9 (s), 143.9 (s), 149.3 (s) ppm; IR (Neat):  $\nu_{\text{max}}/\text{cm}^{-1}$  1479, 1438, 1292; HRMS (ESI):  $m/z$  calcd for C<sub>14</sub>H<sub>15</sub>: 183.1168 [M+H-C<sub>2</sub>H<sub>6</sub>O<sub>2</sub>]<sup>+</sup>; found 183.1172.

**Indene-1,4-dioxepane *cis/trans*-6b** (**R**<sup>1</sup> = **OCH<sub>3</sub>**, **R**<sup>2</sup> = **CH<sub>3</sub>**, **n** = **1**): *conditions A*; (hexanes/ethyl acetate 9:1); (0.14 g, 60%); colorless oil; *cis/trans* ratio 1:3;  $\delta_{\text{H}}$  (300 MHz; CDCl<sub>3</sub>) 1.45 (d,  $J$  = 6.3 Hz, 3H), 1.55 (d,  $J$  = 6.3 Hz, 3H), 3.46 (dd,  $J$  = 0.9, 6.9 Hz, 1H), 3.67-3.90 (m, 10H), 3.95-4.13 (m, 3H), 4.52 (q,  $J$  = 6.3 Hz, 1H), 4.64-4.70 (m, 1H), 5.08 (s, 1H), 5.11 (s, 1H), 6.33 (s, 1H), 6.61 (s, H), 6.69 (dt,  $J$  = 2.4, 8.0 Hz, 1H), 6.79 (dt,  $J$  = 2.4, 8.0 Hz, 1H), 7.03-7.13 (m, 4H) ppm;  $\delta_{\text{C}}$  (75 MHz; CDCl<sub>3</sub>) 19.0, 23.5, 55.6, 69.6, 70.8, 71.5, 73.6, 74.2, 76.8, 84.8, 85.0, 110.5, 110.7, 113.7, 113.8, 121.1, 121.7, 125.9, 127.9, 135.3 (s), 144.5

(s), 145.8 (s), 150.5 (s), 155.1 (s), 158.5 (s), 158.8 (s) ppm; IR (Neat):  $\nu_{\max}/\text{cm}^{-1}$  1480, 1286; HRMS (ESI):  $m/z$  calcd for  $\text{C}_{14}\text{H}_{17}\text{O}_3$ : 233.1172  $[\text{M}+\text{H}]^+$ ; found 233.1169.

**Indene-1,4-dioxepane *trans*-6c** ( $\text{R}^1 = \text{H}$ ,  $\text{R}^2 = \text{C}_6\text{H}_5$ ,  $n = 1$ ): *conditions A*; (hexanes/diethyl ether 9:1); (0.12 g, 47%); mp 116-118 °C (from diethyl ether);  $\delta_{\text{H}}$  (300 MHz;  $\text{CDCl}_3$ ) 3.87-3.95 (m, 1H), 4.12-4.15 (m, 2H), 4.20-4.26 (m, 1H), 5.26 (s, 1H), 5.53 (s, 1H), 6.23 (d,  $J = 1.2$  Hz, 1H), 7.06 (d,  $J = 7.8$  Hz, 1H), 7.15-7.21 (m, 2H), 7.27-7.40 (m, 5H), 7.45 (d,  $J = 6.9$  Hz, 1H) ppm;  $\delta_{\text{C}}$  (75 MHz;  $\text{CDCl}_3$ ) 73.8, 74.9, 83.5, 85.8, 120.9, 123.8, 125.8, 127.0, 128.0, 128.6, 128.7, 128.9, 142.3 (s), 142.6 (s), 155.4 (s) ppm; IR (Neat):  $\nu_{\max}/\text{cm}^{-1}$  1494, 1290, 1164; HRMS (ESI):  $m/z$  calcd for  $\text{C}_{18}\text{H}_{17}\text{O}_2$ : 265.1233  $[\text{M}+\text{H}]^+$ ; found 265.1232.

**Indene-1,5-dioxocane *trans*-7a** ( $\text{R}^1 = \text{H}$ ,  $\text{R}^2 = \text{C}(\text{CH}_3)_3$ ,  $n = 2$ ): *conditions A*; (hexanes/ethyl acetate 9:1); (0.11 g, 45%); colorless oil;  $\delta_{\text{H}}$  (300 MHz;  $\text{CDCl}_3$ ) 0.99 (s, 9H), 1.31-1.41 (m, 1H), 1.93-2.07 (m, 1H), 3.09-3.18 (m, 1H), 3.47 (dt,  $J = 2.1, 12.0$  Hz, 1H), 3.69-3.76 (m, 1H), 3.98-4.05 (m, 2H), 5.19 (s, 1H), 6.64 (s, 1H), 7.17-7.30 (m, 3H), 7.49 (d,  $J = 7.6$  Hz, 1H) ppm;  $\delta_{\text{C}}$  (75 MHz;  $\text{CDCl}_3$ ) 27.1, 32.2, 35.5 (s), 66.2, 68.0, 83.9, 88.8, 120.6, 123.8, 125.8, 128.4, 134.4, 141.7 (s), 145.0 (s), 149.8 (s) ppm; IR (Neat):  $\nu_{\max}/\text{cm}^{-1}$  1462, 1389, 1292; HRMS (ESI)M  $m/z$  calcd for  $\text{C}_{14}\text{H}_{15}$ : 183.1168  $[\text{M}+\text{H}-\text{C}_3\text{H}_8\text{O}_2]^+$ ; found 183.1172.

**Indene-1,5-dioxocane *cis/trans*-7b** ( $\text{R}^1 = \text{H}$ ,  $\text{R}^2 = \text{CH}_3$ ,  $n = 2$ ): *conditions A*; (hexanes/diethyl ether 4:1); (0.13 g, 60%); colorless oil; *cis/trans* ratio 1:3;  $\delta_{\text{H}}$  (300 MHz;  $\text{CDCl}_3$ ) 1.29-1.34 (m, 2H), 1.46 (d,  $J = 6.6$  Hz, 3H), 1.54 (d,  $J = 6.6$  Hz, 3H), 1.78-1.89 (m, 1H), 1.96-2.11 (m, 1H), 3.02-3.11 (m, 2H), 3.54 (dt,  $J = 1.8, 12.0$  Hz, 3H), 3.62-3.72 (m, 3H), 3.85 (t,  $J = 5.4$  Hz, 1H), 3.96-4.02 (m, 1H), 4.56 (q,  $J = 6.6$  Hz, 1H), 4.61 (q,  $J = 6.6$  Hz, 1H), 5.08 (s, 1H), 5.20 (s, 1H), 6.68 (s, 1H), 6.73 (s, 1H), 7.18-7.30 (m, 6H), 7.48-7.53 (m, 2H) ppm;  $\delta_{\text{C}}$  (75 MHz;  $\text{CDCl}_3$ ) 19.0, 23.0, 31.3, 32.4, 63.8, 65.6, 65.8, 67.6, 73.0, 75.3, 80.4, 84.8, 120.8, 121.2, 123.7, 124.0, 126.0, 128.5, 130.5, 131.8, 141.8 (s), 144.0 (s), 144.4 (s), 151.5 (s), 152.3 (s) ppm; IR (Neat):  $\nu_{\max}/\text{cm}^{-1}$  1724, 1600, 1339; HRMS (ESI):  $m/z$  calcd for  $\text{C}_{14}\text{H}_{17}\text{O}_2$ : 217.1233  $[\text{M}+\text{H}]^+$ ; found 217.1233.

**Indene-1,4-oxathiepane *cis*-8:** *conditions A*; (hexanes/ethyl acetate 95:5); (0.16 g, 58%); colorless oil;  $\delta_{\text{H}}$  (300 MHz;  $\text{CDCl}_3$ ) 1.40 (s, 9H), 2.55-2.63 (m, 1H), 2.91-3.03 (m, 2H), 3.69 (s, 1H), 3.88-3.96 (m, 1H), 4.91 (s, 1H), 6.79 (d,  $J = 1.8$  Hz, 1H), 7.14-7.20 (m, 2H), 7.25-7.30 (m, 1H), 7.47 (d,  $J = 7.2$  Hz, 1H) ppm;  $\delta_{\text{C}}$  (75 MHz;  $\text{CDCl}_3$ ) 28.7, 33.2, 35.0 (s), 53.4,

67.4, 86.1, 120.9, 123.5, 125.4, 126.9, 128.8, 141.1 (s), 144.2 (s), 152.7 (s) ppm; IR (Neat):  $\nu_{\max}/\text{cm}^{-1}$  1608, 1458, 1396; HRMS (ESI):  $m/z$  calcd for  $\text{C}_{16}\text{H}_{21}\text{OS}$ : 261.1308  $[\text{M}+\text{H}]^+$ ; found 261.1315.

**Indene-1,4-dithiepane 9:** *conditions B*; (hexanes/ethyl acetate 9:1); (0.23 g, 83%); colorless oil;  $\delta_{\text{H}}$  (400 MHz;  $\text{CDCl}_3$ ) 1.18 (s, 9H), 2.12 (ddd,  $J = 2.0, 10.0, 15.6$  Hz, 1H), 2.66 (ddd,  $J = 2.0, 6.0, 15.6$  Hz, 1H), 2.87-2.99 (m, 2H), 3.97 (s, 1H), 4.29 (s, 1H), 6.91 (s, 1H), 7.16-7.26 (m, 3H), 7.47 (dd,  $J = 0.8, 7.6$  Hz, 1H) ppm;  $\delta_{\text{C}}$  (100 MHz;  $\text{CDCl}_3$ ) 28.4, 30.3, 34.7, 35.5 (s), 52.8, 54.5, 120.9, 124.0, 125.3, 127.6, 129.4, 143.7 (s), 145.6 (s), 153.3 (s) ppm; IR (Neat):  $\nu_{\max}/\text{cm}^{-1}$  1478, 1390, 1361; HRMS (ESI):  $m/z$  calcd for  $\text{C}_{16}\text{H}_{21}\text{S}_2$ : 277.1079  $[\text{M}+\text{H}]^+$ ; found 277.1078.

**1-Methoxy-1H-indene 10:** *conditions A*; (hexanes/diethyl ether 9:1); (0.15 g, 61%); colorless oil;  $\delta_{\text{H}}$  (400 MHz;  $\text{CDCl}_3$ ) 1.03 (s, 9H), 3.27 (s, 3H), 3.35 (s, 3H), 3.64 (s, 1H), 5.09 (s, 1H), 6.67 (s, 1H), 7.17-7.29 (m, 3H), 7.46-7.48 (m, 1H) ppm;  $\delta_{\text{C}}$  (100 MHz;  $\text{CDCl}_3$ ) 26.8, 35.7 (s), 55.0, 58.2, 85.4, 88.6, 121.2, 123.7, 125.7, 128.4, 133.5, 141.9 (s), 143.4 (s), 147.0 (s) ppm; IR (Neat):  $\nu_{\max}/\text{cm}^{-1}$  1465, 1364, 1179; HRMS (ESI):  $m/z$  calcd for  $\text{C}_{14}\text{H}_{15}$ : 183.1168  $[\text{M}+\text{H}-\text{C}_2\text{H}_8\text{O}_2]^+$ ; found 183.1171.

**1-(Ethylthio)-1H-indene 11:** *conditions B*; (hexanes/diethyl ether 9:1); (0.26 g, 99%); colorless oil;  $\delta_{\text{H}}$  (400 MHz;  $\text{CDCl}_3$ ) 0.98 (t,  $J = 7.6$  Hz, 3H), 1.19 (t,  $J = 7.6$  Hz, 3H), 1.22 (s, 9H), 1.81-1.89 (m, 1H), 1.96-2.04 (m, 1H), 2.43-2.52 (m, 1H), 2.57-2.65 (m, 1H), 3.75 (s, 1H), 4.53 (s, 1H), 6.72 (s, 1H), 7.16-7.25 (m, 3H), 7.54 (d,  $J = 7.2$  Hz, 1H) ppm;  $\delta_{\text{C}}$  (100 MHz;  $\text{CDCl}_3$ ) 13.9, 14.9, 21.3, 28.0, 28.8, 36.3 (s), 53.7, 54.9, 120.8, 123.9, 125.2, 127.3, 127.4, 143.4 (s), 143.9 (s), 149.5 (s) ppm; ; IR (Neat):  $\nu_{\max}/\text{cm}^{-1}$  1607, 1461, 1392; HRMS (ESI):  $m/z$  calcd for  $\text{C}_{16}\text{H}_{21}\text{S}$ : 245.1358  $[\text{M}+\text{H}-\text{C}_2\text{H}_6\text{S}]^+$ ; found 245.1362.

**1H-Indene 12a ( $\text{R}^1 = \text{CH}_3\text{CH}_2$ ):** *conditions B*; (hexanes/diethyl ether 4:1); (0.32 g, 83%); yellow oil;  $\delta_{\text{H}}$  (400 MHz;  $\text{CDCl}_3$ ) 0.94 (t,  $J = 7.2$  Hz, 3H), 1.30 (s, 9H), 1.37 (t,  $J = 7.2$  Hz, 3H), 2.01-2.08 (m, 1H), 2.18-2.27 (m, 1H), 2.63-2.73 (m, 2H), 4.09 (s, 1H), 5.33 (s, 1H), 6.94-6.97 (m, 1H), 7.14-7.40 (m, 8H) ppm;  $\delta_{\text{C}}$  (100 MHz;  $\text{CDCl}_3$ ) 14.0, 26.0, 27.7, 31.2, 37.8 (s), 47.8, 52.6, 123.7, 126.2, 127.0, 127.2, 127.6, 127.8, 128.2, 130.7, 137.8 (s), 141.7 (s), 142.7 (s), 143.8 (s), 148.5 (s) ppm; IR (Neat):  $\nu_{\max}/\text{cm}^{-1}$  1475, 1458, 1392; HRMS (ESI):  $m/z$  calcd for  $\text{C}_{24}\text{H}_{30}\text{NaS}_2$ : 405.1681  $[\text{M}+\text{Na}]^+$ ; found 405.1677.

**1H-Indene 12b** ( $R^1 = \text{PhCH}_2\text{CH}_2$ ): *conditions B*; (hexanes/ethyl acetate 9:1); (0.43 g, 80%); yellow oil;  $\delta_{\text{H}}$  (300 MHz;  $\text{CDCl}_3$ ) 1.27 (s, 9H), 2.24-2.27 (m, 1H), 2.44-2.54 (m, 3H), 2.87-3.00 (m, 4H), 4.14 (s, 1H), 5.33 (s, 1H), 6.93-7.12 (m, 4H), 7.13-7.38 (m, 15H) ppm;  $\delta_{\text{C}}$  (75 MHz;  $\text{CDCl}_3$ ) 31.2, 33.6, 35.3, 35.7, 35.8, 37.8 (s), 48.4, 53.1, 123.8, 126.2, 126.3, 126.4, 127.3, 127.4, 128.0, 128.2, 128.4, 128.5, 128.6, 130.7, 137.7 (s), 140.8 (s), 140.9 (s), 141.7 (s), 142.7 (s), 143.7 (s), 149.0 (s) ppm; IR (Neat):  $\nu_{\text{max}}/\text{cm}^{-1}$  1475, 1458, 1392; HRMS (ESI):  $m/z$  calcd for  $\text{C}_{36}\text{H}_{38}\text{KS}_2$ : 573.2047  $[\text{M}+\text{K}]^+$ ; found 573.2047.

**1H-Indene 12c** ( $R^1 = 4\text{-Cl-C}_6\text{H}_4\text{-CH}_2$ ): *conditions B*; (hexanes/ethyl acetate 4:1); (0.50 g, 87%); mp 119-121 °C (from diethyl ether);  $\delta_{\text{H}}$  (300 MHz;  $\text{CDCl}_3$ ) 1.16 (s, 9H), 3.08 (d,  $J = 13.5$  Hz, 1H), 3.32 (d,  $J = 13.5$  Hz, 1H), 3.71 (d,  $J = 13.5$  Hz, 1H), 3.79 (d,  $J = 13.5$  Hz, 1H), 4.05 (s, 1H), 5.19 (s, 1H), 6.45 (d,  $J = 7.2$  Hz, 1H), 6.85-6.91 (m, 3H), 7.15-7.39 (m, 13H) ppm;  $\delta_{\text{C}}$  (75 MHz;  $\text{CDCl}_3$ ) 31.1, 36.1, 37.5, 37.7 (s), 48.4, 52.0, 123.7, 124.1, 126.4, 127.3, 127.6, 127.9, 128.0, 128.4, 128.6, 128.7, 130.3, 130.5, 130.6, 132.5 (s), 132.8 (s), 136.3 (s), 136.9 (s), 137.6 (s), 141.8 (s), 142.6 (s), 143.1 (s), 149.1 (s) ppm; IR (Neat):  $\nu_{\text{max}}/\text{cm}^{-1}$  1596, 1488, 1264; HRMS (ESI):  $m/z$  calcd for  $\text{C}_{34}\text{H}_{32}\text{Cl}_2\text{NaS}_2$ : 597.1215  $[\text{M}+\text{Na}]^+$ ; found 597.1218.

**1H-Indene 12d** ( $R^1 = 4\text{-Br-C}_6\text{H}_4\text{-CH}_2$ ): *conditions B*; (hexanes/ethyl acetate 4:1); (0.56 g, 85 %); mp 125-127 °C (from diethyl ether);  $\delta_{\text{H}}$  (400 MHz;  $\text{CDCl}_3$ ) 1.17 (s, 9H), 3.08 (d,  $J = 13.6$  Hz, 1H), 3.31 (d,  $J = 13.6$  Hz, 1H), 3.70 (d,  $J = 13.5$  Hz, 1H), 3.79 (d,  $J = 13.5$  Hz, 1H), 4.06 (s, 1H), 5.21 (s, 1H), 6.47 (d,  $J = 7.2$  Hz, 1H), 6.82-6.83 (m, 2H), 6.90-6.93 (m, 1H), 7.08-7.15 (m, 1H), 7.19-7.21 (m, 2H), 7.28-7.46 (m, 10H) ppm;  $\delta_{\text{C}}$  (100 MHz;  $\text{CDCl}_3$ ) 31.2, 36.2, 37.6, 37.7 (s), 48.5, 52.1, 120.6, 120.9, 123.8, 124.2, 126.5, 127.3, 127.6, 128.0, 128.4, 130.5, 130.7, 130.9, 131.1 (s), 131.6, 131.7 (s), 136.9 (s), 137.5 (s), 137.7 (s), 141.9 (s), 142.6 (s), 143.1 (s), 149.2 (s) ppm; IR (Neat):  $\nu_{\text{max}}/\text{cm}^{-1}$  1589, 1361, 1070; HRMS (ESI):  $m/z$  calcd for  $\text{C}_{34}\text{H}_{33}\text{Br}_2\text{S}_2$ : 663.0390  $[\text{M}+\text{H}]^+$ ; found 663.0392.

## DFT Computational Study

The 1,3-disubstituted 2-alkylidene-2,3-dihydroindenes **28**, **29** and **30** shown in Figure S1 have been used as slightly simplified models of compounds **12** in the experimental study. Their geometries have been fully optimized by DFT methods using the B3LYP functional<sup>6</sup> and the 6-311++G(d,p) basis set<sup>7</sup> as implemented in the Gaussian 09 package.<sup>8</sup> All the energy minima were characterized by frequency analysis.

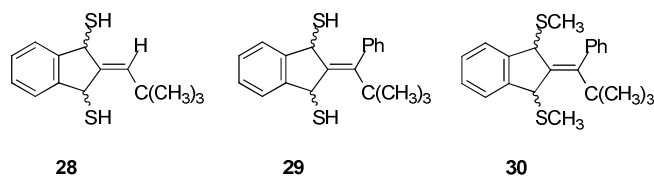

**Figure S1.** 2-Alkylidene-2,3-dihydroindenes **28**, **29** and **30**

The *cis* and *trans* diastereoisomers of **28**, **29** and **30** have been computed. Their relative energies are gathered in Table S1. In the three pairs, the *cis* diastereoisomer is always the most stable one. The difference in energy between the two diastereoisomers in each pair increases with the substitution at the exocyclic carbon atom (compare entries 1 and 2). With a methyl group linked to each S atom, entry 3, the *cis* diastereoisomer is still the most stable although in slightly lower extent.

**Table S1.** Relative energies (RE, in  $\text{kJ}\cdot\text{mol}^{-1}$ ) of the *cis* and *trans* diastereoisomers of **28**, **29** and **30**.

| Entry | 2,3-Dihydroindene | RE   |
|-------|-------------------|------|
| 1     | <i>cis_28</i>     | 0.0  |
|       | <i>trans_28</i>   | 4.4  |
| 2     | <i>cis_29</i>     | 0.0  |
|       | <i>trans_29</i>   | 24.4 |
| 3     | <i>cis_30</i>     | 0.0  |
|       | <i>trans_30</i>   | 19.6 |

The B3LYP energies in Hartrees, the number of imaginary frequencies (NIMAG) and the Cartesian coordinates of 2-alkylidene-2,3-dihydroindenes **28**, **29** and **30** are collected in Table S2.

**Table S2.** B3LYP energies in Hartrees, Number of Imaginary Frequencies (NIMAG) and Cartesian Coordinates of 2-Alkylidene-2,3-dihydroindenes **28**, **29** and **30**

|                                                                                                                                                                                                                                                                                                                                                                                                                                                                                                                                                                                                                                                                                                                                                                                                                                                                                                                                                                                                                                                                                                                                                                                                                                                                                                                                                                                                                                                                                                                                                                                                                                                                                                                        |                                                                                                                                                                                                                                                                                                                                                                                                                                                                                                                                                                                                                                                                                                                                                                                                                                                                                                                                                                                                                                                                                                                                                                                                                                                                                                                                                                                                                                                                                                                                                                                                                                                                                                                                               |
|------------------------------------------------------------------------------------------------------------------------------------------------------------------------------------------------------------------------------------------------------------------------------------------------------------------------------------------------------------------------------------------------------------------------------------------------------------------------------------------------------------------------------------------------------------------------------------------------------------------------------------------------------------------------------------------------------------------------------------------------------------------------------------------------------------------------------------------------------------------------------------------------------------------------------------------------------------------------------------------------------------------------------------------------------------------------------------------------------------------------------------------------------------------------------------------------------------------------------------------------------------------------------------------------------------------------------------------------------------------------------------------------------------------------------------------------------------------------------------------------------------------------------------------------------------------------------------------------------------------------------------------------------------------------------------------------------------------------|-----------------------------------------------------------------------------------------------------------------------------------------------------------------------------------------------------------------------------------------------------------------------------------------------------------------------------------------------------------------------------------------------------------------------------------------------------------------------------------------------------------------------------------------------------------------------------------------------------------------------------------------------------------------------------------------------------------------------------------------------------------------------------------------------------------------------------------------------------------------------------------------------------------------------------------------------------------------------------------------------------------------------------------------------------------------------------------------------------------------------------------------------------------------------------------------------------------------------------------------------------------------------------------------------------------------------------------------------------------------------------------------------------------------------------------------------------------------------------------------------------------------------------------------------------------------------------------------------------------------------------------------------------------------------------------------------------------------------------------------------|
| <p><i>cis_28</i>, B3LYP Energy= -1340.89255049 Hartree, NIMAG= 0</p> <p>C,-3.1561283418,0.9856590598,0.1729834743<br/> C,-3.2875953401,-0.4047951061,0.1041756997<br/> C,-2.1604896505,-1.2248608662,0.0898265164<br/> C,-0.9000842501,-0.6364897034,0.15322345<br/> C,-0.7694532727,0.752660865,0.2254399111<br/> C,-1.8936530872,1.5748409215,0.2298446198<br/> H,-4.0427462605,1.609459513,0.1832756465<br/> H,-4.2759405789,-0.8485652639,0.0611106319<br/> H,-2.2651306452,-2.3021887057,0.0222211913<br/> H,-1.7911897249,2.6535155029,0.2775292903<br/> C,0.4526826086,-1.3061235942,0.173692626<br/> H,0.4818015779,-2.1461646941,0.8630890539<br/> C,0.685294162,1.1387602266,0.2826379137<br/> H,0.9025026221,1.901329651,1.0297714948<br/> C,1.390842466,-0.1783035468,0.578514232<br/> C,2.5809517937,-0.2038602487,1.1891068608<br/> H,3.0066796427,0.7802967394,1.3944607198<br/> S,0.8803651419,-2.1152945218,-1.4646308322<br/> H,0.9258698327,-0.9684993318,-2.1748248056<br/> S,1.1412173175,1.8830967684,-1.3864032828<br/> H,2.4601328375,2.0167981059,-1.1326874406<br/> C,3.519271963,-1.3155054565,1.6284184183<br/> C,2.8998588945,-2.7221166667,1.6669931764<br/> C,4.7218786679,-1.318974411,0.6532004182<br/> C,4.0262052651,-0.9619545781,3.0461938814<br/> H,2.0473316596,-2.7666006582,2.35062783<br/> H,2.5816588936,-3.0527650198,0.6772471472<br/> H,3.6445843407,-3.4376166728,2.0281879728<br/> H,5.203223461,-0.337146466,0.6135062096<br/> H,5.4723330948,-2.046581873,0.9787098943<br/> H,4.4023173277,-1.5830557536,-0.3575136972<br/> H,4.7566985261,-1.70204595,3.3857508868<br/> H,4.5106331972,0.0189995319,3.0624932495<br/> H,3.2025414583,-0.9431586968,3.7656410418</p> | <p><i>trans_28</i>, B3LYP Energy= -1340.89088471 Hartree, NIMAG= 0</p> <p>C,-2.6596736437,1.8698664396,0.0960029709<br/> C,-3.1875589365,0.6789005052,0.6016260729<br/> C,-2.3866571812,-0.4578039533,0.7098928923<br/> C,-1.0552748209,-0.3841974504,0.3081424244<br/> C,-0.5241116176,0.8105584588,-0.1816553021<br/> C,-1.3227129653,1.9438806434,-0.2962948129<br/> H,-3.2921450766,2.7469799505,0.0173621216<br/> H,-4.2242802783,0.6401241422,0.9166343261<br/> H,-2.7983437578,-1.3807841254,1.1057915263<br/> H,-0.9054275651,2.8732159424,-0.6668423721<br/> C,-0.0160648783,-1.4726995424,0.3137866923<br/> H,-0.0390687541,-2.0828990089,1.2113434853<br/> C,0.9341191111,0.626062525,-0.5399454012<br/> H,1.0348696749,0.5479107153,-1.6293398779<br/> C,1.2922331036,-0.7241663554,0.1107309944<br/> C,2.5414618874,-1.0848700804,0.4160187426<br/> H,3.2954635939,-0.3390523229,0.1669143062<br/> S,-0.2298161316,-2.6441390598,-1.1490947629<br/> H,-1.5451322353,-2.8868643633,-0.9668600621<br/> S,2.0282915198,2.0598560435,-0.1576666383<br/> H,1.7993293128,2.073941334,1.1726920075<br/> C,3.161957566,-2.3306209734,1.0268521272<br/> C,2.1808645491,-3.3093850028,1.6932019603<br/> C,3.925275079,-3.0675270284,-0.1009768364<br/> C,4.1819247959,-1.8590375007,2.0904393048<br/> H,1.6326135679,-2.8313574009,2.509913744<br/> H,1.4663039719,-3.7255326021,0.9807322142<br/> H,2.7403907138,-4.1459610116,2.1223494692<br/> H,4.6454118183,-2.4058267907,-0.5910340347<br/> H,4.4762242611,-3.9201105011,0.309023535<br/> H,3.2350407718,-3.4397407345,-0.8620321393<br/> H,4.7118927215,-2.7155815748,2.517563947<br/> H,4.9260292286,-1.1856456062,1.6553845784<br/> H,3.6828373938,-1.3277770106,2.9059890969</p> |
| <p><i>cis_29</i>, B3LYP Energy= -1571.98999686 Hartree, NIMAG= 0</p> <p>C,-3.2620553602,0.6483440119,0.2935353436<br/> C,-3.2070366643,-0.6924189736,-0.1018579943<br/> C,-1.9849929971,-1.3565470647,-0.1912244398<br/> C,-0.8198244415,-0.6632861761,0.1276383134<br/> C,-0.8752414558,0.6724343608,0.5230451945<br/> C,-2.0938193549,1.3429144332,0.6032057354<br/> H,-4.2207185403,1.1505646729,0.3581090331<br/> H,-4.1241479927,-1.2190374284,-0.3411575453<br/> H,-1.9431613295,-2.3918212311,-0.5117636186<br/> H,-2.1339439994,2.3856111781,0.8987465131<br/> C,0.6009207964,-1.1664672955,0.143896006<br/> H,0.666837877,-2.1347641959,0.6267802325<br/> C,0.5093258381,1.193873214,0.7986909331<br/> H,0.5666141357,1.8105036488,1.6912220738<br/> C,1.3638439817,-0.0717968681,0.8885183216<br/> C,2.5152627907,-0.138079466,1.5897433951<br/> S,1.2571832852,-1.527697771,-1.5772261393<br/> H,1.2359241778,-0.246746095,-2.002030092<br/> S,0.9552158975,2.3293426445,-0.6395498706</p>                                                                                                                                                                                                                                                                                                                                                                                                                                                                                                                                                                                                                                                                                                                  | <p><i>trans_29</i>, B3LYP Energy= -1571.98071619 Hartree, NIMAG= 0</p> <p>C,-4.5314573063,-1.704523551,0.2570937557<br/> C,-4.9411957772,-0.3983136778,-0.029062599<br/> C,-3.9992511545,0.6095504534,-0.2219291057<br/> C,-2.6443767769,0.2936064728,-0.1305886097<br/> C,-2.236641522,-1.0125091963,0.1194202411<br/> C,-3.1764621408,-2.0220182181,0.3217570489<br/> H,-5.2739672951,-2.4787716853,0.4138321832<br/> H,-5.9985436854,-0.1689825847,-0.0993861506<br/> H,-4.3223722555,1.6235666383,-0.434929523<br/> H,-2.858341781,-3.0417949753,0.505750064<br/> C,-1.4653744604,1.2207905388,-0.2101643001<br/> H,-1.5063429213,1.8948496247,-1.0608633402<br/> C,-0.7365437933,-1.1326978308,0.0466664186<br/> H,-0.3042412666,-1.6017492121,0.9296082759<br/> C,-0.2336570255,0.3069792355,-0.1772625971<br/> C,1.073805212,0.6456960969,-0.2475209431<br/> S,-1.4217365457,2.2919263994,1.3459122221<br/> H,-2.7011848683,2.715408955,1.2766314111<br/> S,-0.4153696622,-2.3184039003,-1.3759470468</p>                                                                                                                                                                                                                                                                                                                                                                                                                                                                                                                                                                                                                                                                                                                              |



|                                                                                                                                                                                                                                                                                                                                                                                                                                                                                                                                                                                                                                                                                                                                                                                                                                                                                                                                                                                                                                                                                                                                                                                                                                                                                                                                                                                                                                                                                                                                                                                                                                                                                                                                                                                                                                                                                                                                                                                                                                                                                                                                                                                                                                                                                                                                                            |                                                                                                                                                                                                                                                                                                                                                                                                                                                                                                                                                                                                                                                                                                                                                                                                                                                                                                                                                                                                                                                                                                                                                                                                                                                                                                                                                                                                                                                                                                                                                                                                                                                                                                                                                                                                                                                                                                                                                                                                                                                                                                                                                                                                                                                                                                                                                         |
|------------------------------------------------------------------------------------------------------------------------------------------------------------------------------------------------------------------------------------------------------------------------------------------------------------------------------------------------------------------------------------------------------------------------------------------------------------------------------------------------------------------------------------------------------------------------------------------------------------------------------------------------------------------------------------------------------------------------------------------------------------------------------------------------------------------------------------------------------------------------------------------------------------------------------------------------------------------------------------------------------------------------------------------------------------------------------------------------------------------------------------------------------------------------------------------------------------------------------------------------------------------------------------------------------------------------------------------------------------------------------------------------------------------------------------------------------------------------------------------------------------------------------------------------------------------------------------------------------------------------------------------------------------------------------------------------------------------------------------------------------------------------------------------------------------------------------------------------------------------------------------------------------------------------------------------------------------------------------------------------------------------------------------------------------------------------------------------------------------------------------------------------------------------------------------------------------------------------------------------------------------------------------------------------------------------------------------------------------------|---------------------------------------------------------------------------------------------------------------------------------------------------------------------------------------------------------------------------------------------------------------------------------------------------------------------------------------------------------------------------------------------------------------------------------------------------------------------------------------------------------------------------------------------------------------------------------------------------------------------------------------------------------------------------------------------------------------------------------------------------------------------------------------------------------------------------------------------------------------------------------------------------------------------------------------------------------------------------------------------------------------------------------------------------------------------------------------------------------------------------------------------------------------------------------------------------------------------------------------------------------------------------------------------------------------------------------------------------------------------------------------------------------------------------------------------------------------------------------------------------------------------------------------------------------------------------------------------------------------------------------------------------------------------------------------------------------------------------------------------------------------------------------------------------------------------------------------------------------------------------------------------------------------------------------------------------------------------------------------------------------------------------------------------------------------------------------------------------------------------------------------------------------------------------------------------------------------------------------------------------------------------------------------------------------------------------------------------------------|
| <p>H,2.1397925537,2.7421801071,-0.1430167744<br/> C,3.4720197132,-1.350639889,1.7675176063<br/> C,2.8044225715,-2.7339443595,1.6237278852<br/> C,4.6015222561,-1.253648414,0.710949739<br/> C,4.1166877,-1.3206001677,3.1752346822<br/> H,1.9313263392,-2.8347693852,2.274421409<br/> H,2.5197458968,-2.9535010957,0.5953080529<br/> H,3.5237567185,-3.5015938929,1.9226026473<br/> H,5.2016059227,-0.3512100887,0.842658688<br/> H,5.2740338826,-2.1114549827,0.8138360706<br/> H,4.1906954844,-1.259033515,-0.3007905458<br/> H,4.7989749456,-2.1693260681,3.2748497615<br/> H,4.6885190616,-0.409404766,3.3528356866<br/> H,3.3627124797,-1.4047261265,3.9635755843<br/> C,2.9867816277,1.1334467253,2.2506869545<br/> C,3.918524028,1.9783970807,1.6325685782<br/> C,2.5032940408,1.4985102162,3.515072993<br/> C,4.3588324248,3.1439663602,2.2612361389<br/> H,4.3018673485,1.7248418683,0.6511923083<br/> C,2.9381526481,2.6635213085,4.1427428411<br/> H,1.779574636,0.8595384244,4.0095056765<br/> C,3.8714185246,3.4904588035,3.5188388456<br/> H,5.0802502703,3.7821908022,1.762795092<br/> H,2.5481064885,2.9247041827,5.1203971359<br/> H,4.2116269924,4.3967457727,4.0067613484</p>                                                                                                                                                                                                                                                                                                                                                                                                                                                                                                                                                                                                                                                                                                                                                                                                                                                                                                                                                                                                                                                                                                                                                           | <p>H,0.8813213222,-2.5632614899,-1.1048688592<br/> C,1.6966017418,2.0308825424,-0.5940870072<br/> C,0.7494794088,2.9923078278,-1.3418820316<br/> C,2.1921936653,2.714388203,0.7038566585<br/> C,2.9245948307,1.8481774323,-1.5237079214<br/> H,0.3337220577,2.5237925645,-2.2381159152<br/> H,-0.059620982,3.3602043112,-0.7134241219<br/> H,1.3227265941,3.8652648582,-1.6660314152<br/> H,2.9236739097,2.093638589,1.2264814339<br/> H,2.6777790683,3.6637323968,0.4565887623<br/> H,1.3666606111,2.926106628,1.3851044439<br/> H,3.3276738533,2.8344972703,-1.7684964695<br/> H,3.7240333499,1.2722747643,-1.0582764483<br/> H,2.6488448845,1.3622080613,-2.4639519452<br/> C,2.0763487772,-0.4086978971,0.1547929191<br/> C,2.262016665,-0.6723227436,1.5193882117<br/> C,2.8466108261,-1.1359876774,-0.7644105254<br/> C,3.1851556954,-1.6233451283,1.9530556271<br/> H,1.6737863711,-0.1235866879,2.2468739111<br/> C,3.7668428373,-2.0904930109,-0.3341976802<br/> H,2.7190071662,-0.9612124402,-1.8253238178<br/> C,3.9417810434,-2.3368248363,1.0267120847<br/> H,3.3098794225,-1.8051989779,3.0148460065<br/> H,4.3461889535,-2.6434410047,-1.0654960586<br/> H,4.6589859529,-3.078254588,1.3601967528</p>                                                                                                                                                                                                                                                                                                                                                                                                                                                                                                                                                                                                                                                                                                                                                                                                                                                                                                                                                                                                                                                                                                                                    |
| <p><i>cis_30</i>, B3LYP Energy= -1650.62962857 Hartree, NIMAG= 0</p>                                                                                                                                                                                                                                                                                                                                                                                                                                                                                                                                                                                                                                                                                                                                                                                                                                                                                                                                                                                                                                                                                                                                                                                                                                                                                                                                                                                                                                                                                                                                                                                                                                                                                                                                                                                                                                                                                                                                                                                                                                                                                                                                                                                                                                                                                       | <p><i>trans_30</i>, B3LYP Energy= -1650.62215681 Hartree, NIMAG= 0</p>                                                                                                                                                                                                                                                                                                                                                                                                                                                                                                                                                                                                                                                                                                                                                                                                                                                                                                                                                                                                                                                                                                                                                                                                                                                                                                                                                                                                                                                                                                                                                                                                                                                                                                                                                                                                                                                                                                                                                                                                                                                                                                                                                                                                                                                                                  |
| <p>C,-3.7774383608,-1.9977686429,-1.4036924713<br/> C,-4.3104463782,-0.7315113908,-1.6533946035<br/> C,-3.5748728623,0.4166223186,-1.3536649916<br/> C,-2.30881141,0.2802186926,-0.7884395943<br/> C,-1.7715058782,-0.9882878595,-0.5496725562<br/> C,-2.5006070408,-2.13329656,-0.856998774<br/> H,-4.3532717872,-2.8822045856,-1.6526199258<br/> H,-5.2957821291,-0.6398080761,-2.0965030003<br/> H,-3.9823324609,1.3960496183,-1.5785398248<br/> H,-2.0830813315,-3.1201924901,-0.6904103378<br/> C,-1.3192079219,1.3562560254,-0.4206156992<br/> H,-1.2938753464,2.1505179794,-1.1590587515<br/> C,-0.378373016,-0.8688550582,0.0030400654<br/> H,0.3237499962,-1.5678793178,-0.4480374129<br/> C,-0.0039138773,0.5890405861,-0.2889274258<br/> C,1.2690820248,1.0031537907,-0.4560230039<br/> S,-1.6658466065,2.1629377085,1.2365205925<br/> S,-0.3170977736,-1.2459035434,1.8452499624<br/> C,1.800310767,2.4407955889,-0.708537424<br/> C,0.7665609637,3.4366525742,-1.2702217663<br/> C,2.3237595771,3.0060161772,0.6364366843<br/> C,2.977755004,2.4128201204,-1.7137434212<br/> H,0.3355750336,3.0849371173,-2.2115786949<br/> H,-0.0312880291,3.651131864,-0.558900649<br/> H,1.2743697617,4.3825673371,-1.4796477921<br/> H,3.1355688566,2.398418094,1.0407266029<br/> H,2.713150584,4.0176312048,0.4825408354<br/> H,1.5232311669,3.0571812882,1.3777689574<br/> H,3.3397983239,3.4328498801,-1.8696506994<br/> H,3.815107852,1.8118071993,-1.3584146595<br/> H,2.6655103959,2.0187345303,-2.685346391<br/> C,2.3429066397,-0.0503711115,-0.3360462918<br/> C,2.9636384298,-0.3318300045,0.8868527487<br/> C,2.7345148719,-0.7871750732,-1.4631820662<br/> C,3.9575893038,-1.3069539632,0.9758129205<br/> H,2.6515126633,0.1977927674,1.777449639<br/> C,3.7238174654,-1.7643527543,-1.3757402744<br/> H,2.2575247862,-0.5908504411,-2.4174150986<br/> C,4.3435960763,-2.0247088972,-0.1541632061<br/> H,4.4248743306,-1.5085066662,1.933625176<br/> H,4.0105781927,-2.3203149801,-2.261741954<br/> H,5.1165210321,-2.7819272952,-0.0837340876<br/> C,-3.3188918365,2.8887286698,0.9707055273<br/> H,-3.3195042309,3.5796818076,0.1248067065<br/> H,-4.0755887874,2.1169534226,0.8300140767<br/> H,-3.5491234784,3.4477469447,1.8789364126<br/> C,0.1525120166,-3.0108715845,1.7919487548<br/> H,-0.6223626659,-3.6234057654,1.3284757557</p> | <p>C,-4.3658114085,-1.8650121355,0.0365916577<br/> C,-4.8349544493,-0.5741395258,-0.2225761129<br/> C,-3.9413546632,0.4891226042,-0.3403948233<br/> C,-2.5749239281,0.2462251672,-0.1925058127<br/> C,-2.10456263,-1.0516229373,0.0000738234<br/> C,-2.9979310595,-2.1123223941,0.1319321864<br/> H,-5.0697419184,-2.6836891986,0.1360925566<br/> H,-5.8991956353,-0.3996887865,-0.3349075813<br/> H,-4.309971275,1.4862722254,-0.5520163605<br/> H,-2.6396223464,-3.1252455763,0.2775330631<br/> C,-1.4427319093,1.2333598125,-0.1831338586<br/> H,-1.5237556479,1.9885538257,-0.9610568223<br/> C,-0.6005363991,-1.0953013889,-0.0778569572<br/> H,-0.1330318592,-1.5853048016,0.7773420148<br/> C,-0.1708255806,0.3776133648,-0.2255346925<br/> C,1.1214401995,0.775204825,-0.2755622929<br/> S,-1.37045059,2.1367680157,1.4693923564<br/> S,-0.0926911262,-2.1211008189,-1.5707452003<br/> C,1.6887326801,2.1897244332,-0.5885842453<br/> C,0.6825564728,3.1590879832,-1.2411791963<br/> C,2.2368611662,2.8388423273,0.7053788586<br/> C,2.8664056629,2.0632616002,-1.5907586367<br/> H,0.2393814524,2.7293288408,-2.1436525218<br/> H,-0.1060774542,3.4613455503,-0.5538189142<br/> H,1.2147798878,4.0667234455,-1.5396320571<br/> H,3.0119497218,2.2216915693,1.1644585772<br/> H,2.6819136768,3.8102431214,0.4673352699<br/> H,1.4391971077,2.9981787895,1.4327637034<br/> H,3.2308858376,3.0647848087,-1.8347465997<br/> H,3.7034485452,1.4978798858,-1.1819559911<br/> H,2.5508114143,1.5880193142,-2.5240638242<br/> C,2.165769422,-0.2449492843,0.1117485311<br/> C,2.3661586766,-0.4959500641,1.4770948934<br/> C,2.958674679,-0.9444365748,-0.8077373631<br/> C,3.3341402719,-1.4012348141,1.9129760709<br/> H,1.757001354,0.0291413405,2.2049392106<br/> C,3.9231010355,-1.8526563435,-0.3757543088<br/> H,2.8090078461,-0.7916944787,-1.8677990377<br/> C,4.1192297051,-2.0819195702,0.9860350745<br/> H,3.4719554947,-1.5703976856,2.9753511511<br/> H,4.5224480872,-2.38403829,-1.1071161528<br/> H,4.8738526902,-2.7859267689,1.318888948<br/> C,-2.9376270779,3.07113449,1.5035461763<br/> H,-2.8851125725,3.7039149762,2.3910773163<br/> H,-3.0382941774,3.7113940828,0.6244710839<br/> H,-3.799147138,2.4099685356,1.5917070385<br/> C,0.4739241735,-3.6585106195,-0.764563175<br/> H,1.3252404182,-3.4614104759,-0.1117462065</p> |

## References

- [1] G. D. Hartman, B. T. Phillips, W. Halczenko, *J. Org. Chem.*, **1985**, *50*, 2423.
- [2] D. C. Remy, S. W. King, D. Cochran, *J. Org. Chem.*, **1985**, *50*, 4120.
- [3] D. Dumoulin, S. Lebrun, E. Deniau, A. Couture, P. Grandclaoudon, *Eur. J. Org. Chem.*, **2009**, 3741.
- [4] (a) N. Srivastava, S. K. Dasgupta, B. K. Banik, *Tetrahedron Lett.*, **2003**, *44*, 1191. (b) F. Shirini, M. Abedini, M. Ghasemi, A. R. Sakhaei, *Bull. Korean Chem. Soc.*, **2009**, *30*, 2479.
- [5] S. K. Meegalla, R. Rodrigo, *J. Org. Chem.*, **1991**, *56*, 1882.
- [6] (a) R. G. Parr, W. Yang, *Density-Functional Theory of Atoms and Molecules*; Oxford University Press: New York, NY, 1989. (b) L. J. Bartolotti, K. Fluchichk, In *Reviews in Computational Chemistry*; K. B. Lipkowitz, D. B. Boyds, Eds.; VCH: New York, NY, 1996; Vol. 7, pp 187–216; (c) W. Kohn, A. D. Becke, R. G. J. Parr, *Phys. Chem.*, **1996**, *100*, 12974; (d) T. Ziegler, *Chem. Rev.*, **1991**, *91*, 651.
- [7] (a) R. Ditchfield, *Mol. Phys.*, **1974**, *27*, 789. (b) M. J. Frisch, J. A. Pople, J. S. Binkley, *J. Chem. Phys.*, **1984**, *80*, 3265.
- [8] Gaussian 09, Revision D.01, M. J. Frisch, G. W. Trucks, H. B. Schlegel, G. E. Scuseria, M. A. Robb, J. R. Cheeseman, G. Scalmani, V. Barone, B. Mennucci, G. A. Petersson, H. Nakatsuji, M. Caricato, X. Li, H. P. Hratchian, A. F. Izmaylov, J. Bloino, G. Zheng, J. L. Sonnenberg, M. Hada, M. Ehara, K. Toyota, R. Fukuda, J. Hasegawa, M. Ishida, T. Nakajima, Y. Honda, O. Kitao, H. Nakai, T. Vreven, J. A. Montgomery, Jr., J. E. Peralta, F. Ogliaro, M. Bearpark, J. J. Heyd, E. Brothers, K. N. Kudin, V. N. Staroverov, T. Keith, R. Kobayashi, J. Normand, K. Raghavachari, A. Rendell, J. C. Burant, S. S. Iyengar, J. Tomasi, M. Cossi, N. Rega, J. M. Millam, M. Klene, J. E. Knox, J. B. Cross, V. Bakken, C. Adamo, J. Jaramillo, R. Gomperts, R. E. Stratmann, O. Yazyev, A. J. Austin, R. Cammi, C. Pomelli, J. W. Ochterski, R. L. Martin, K. Morokuma, V. G. Zakrzewski, G. A. Voth, P. Salvador, J. J. Dannenberg, S. Dapprich, A. D. Daniels, O. Farkas, J. B. Foresman, J. V. Ortiz, J. Cioslowski, and D. J. Fox, Gaussian, Inc., Wallingford CT, 2013.

<sup>1</sup>H NMR of *trans*-6a

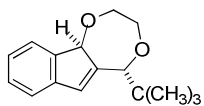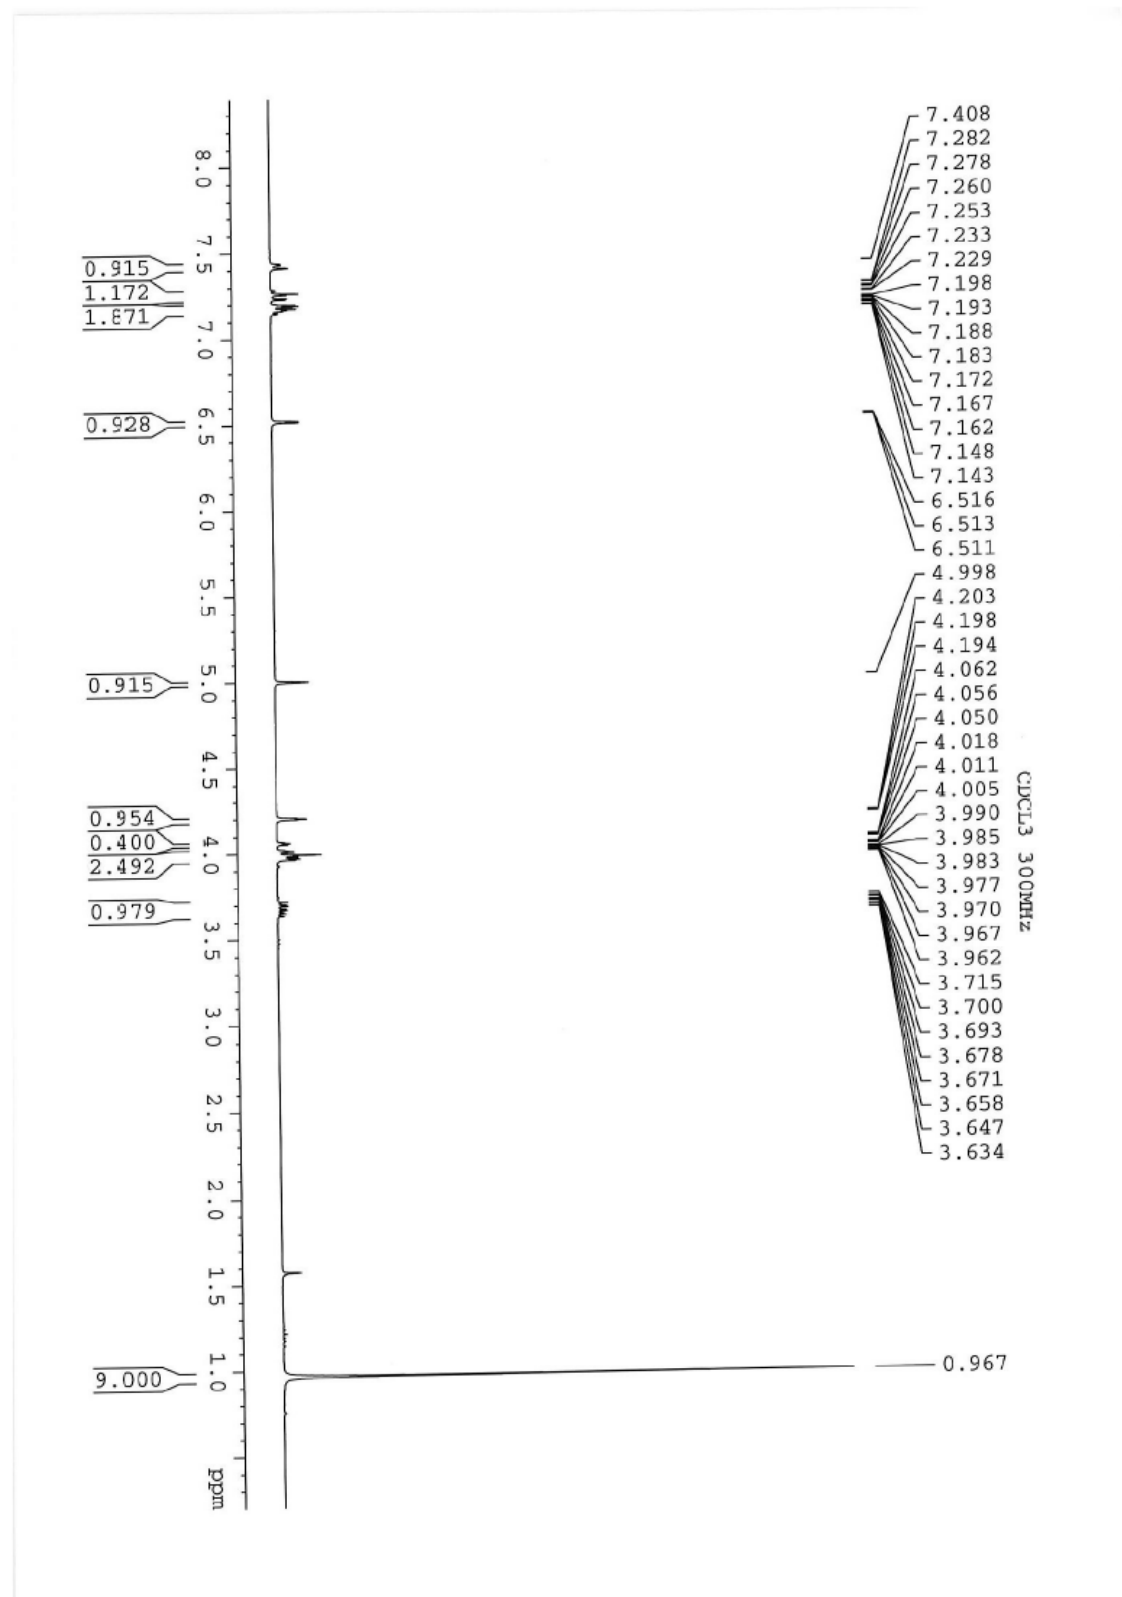

$^{13}\text{C}$  NMR of *trans*-6a

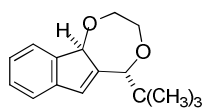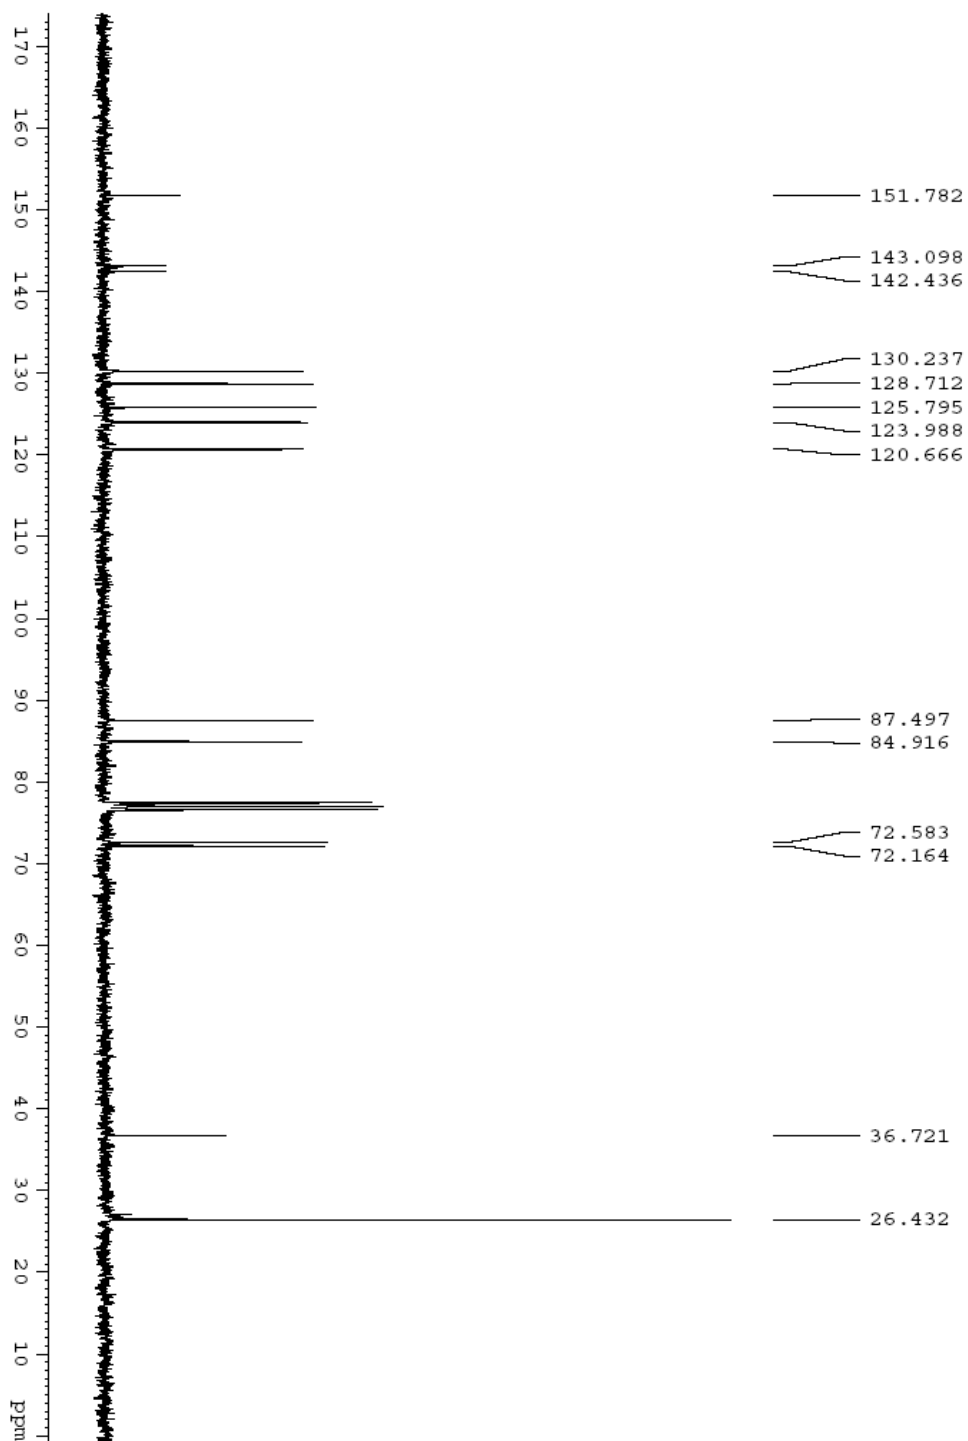

$\text{CDCl}_3$  75 MHz

$^1\text{H}$  NMR of *cis*-6a

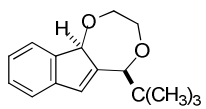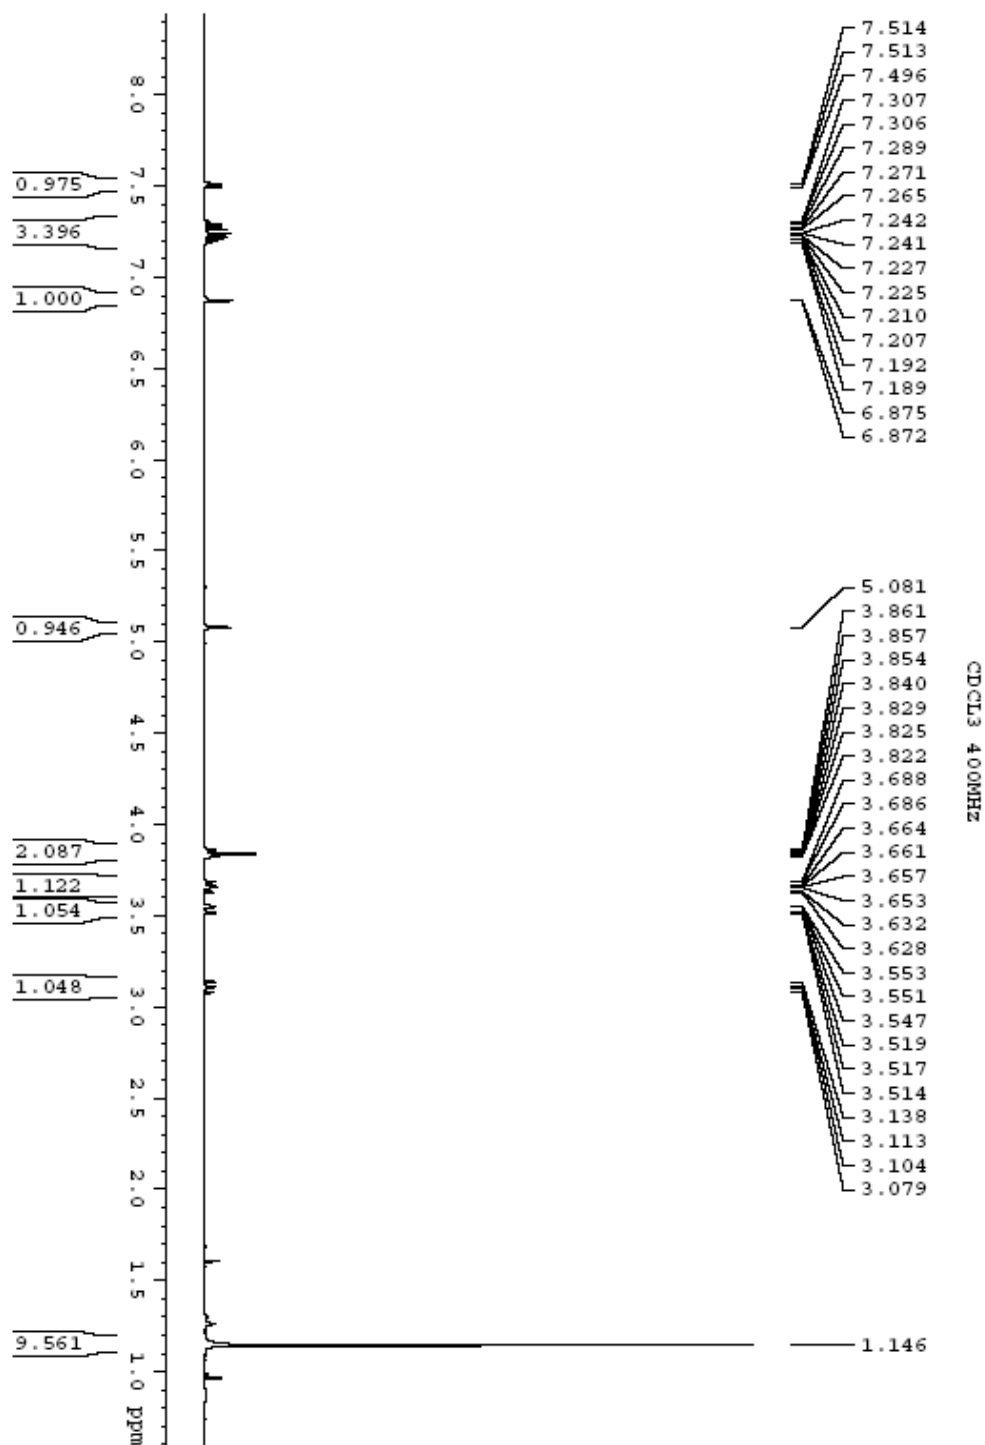

$^{13}\text{C}$  NMR of *cis*-6a

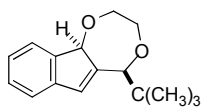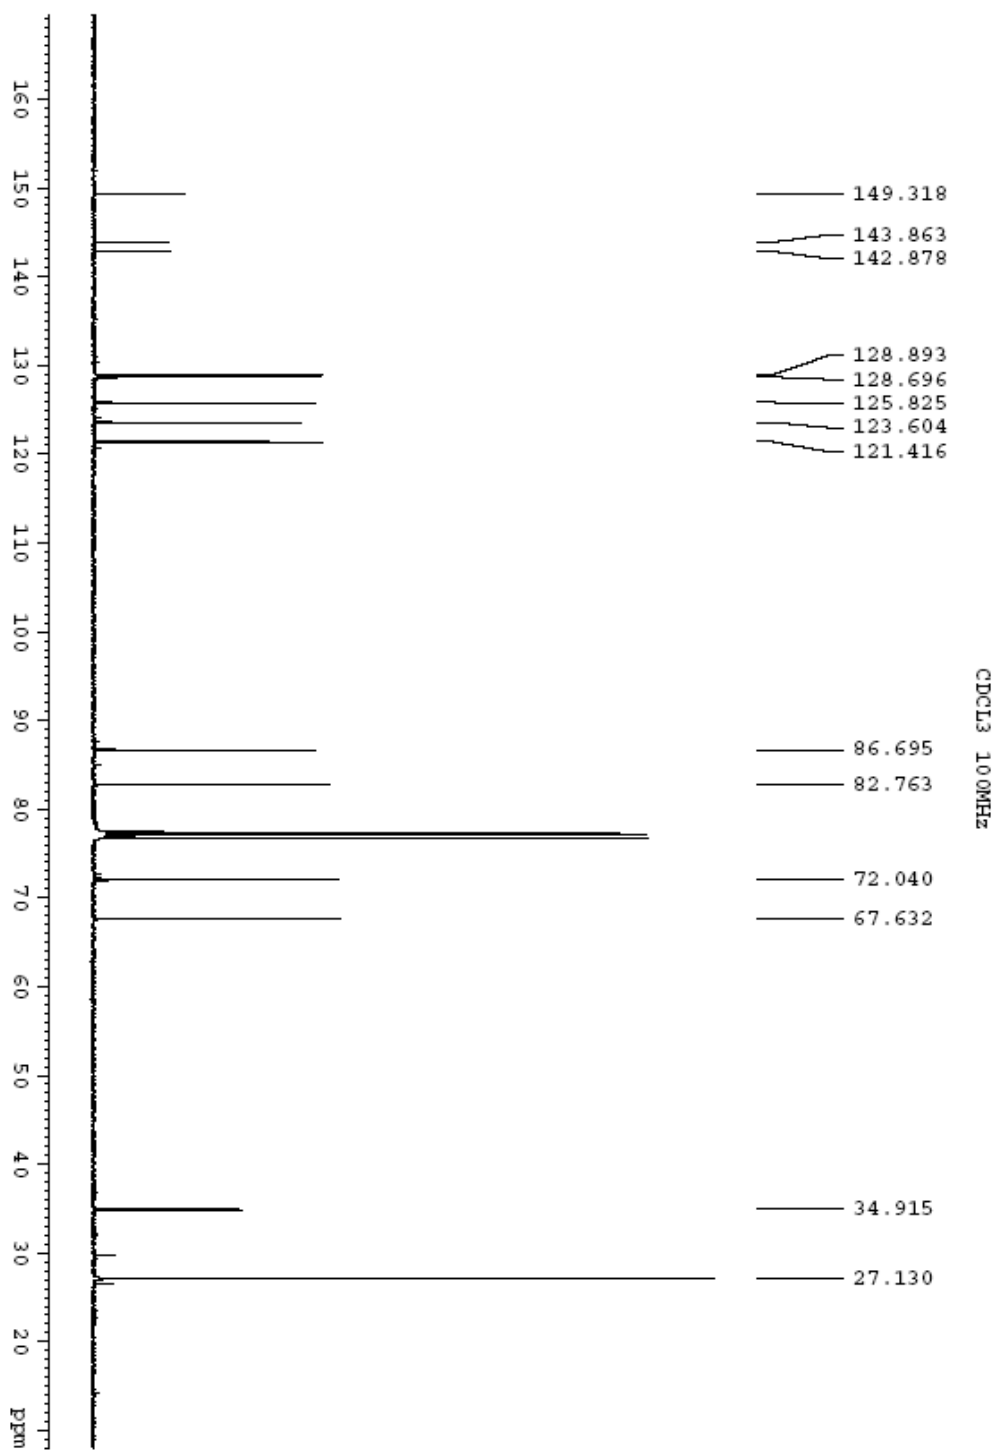

<sup>1</sup>H NMR of *cis/trans*-6b

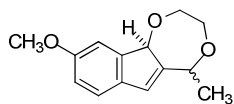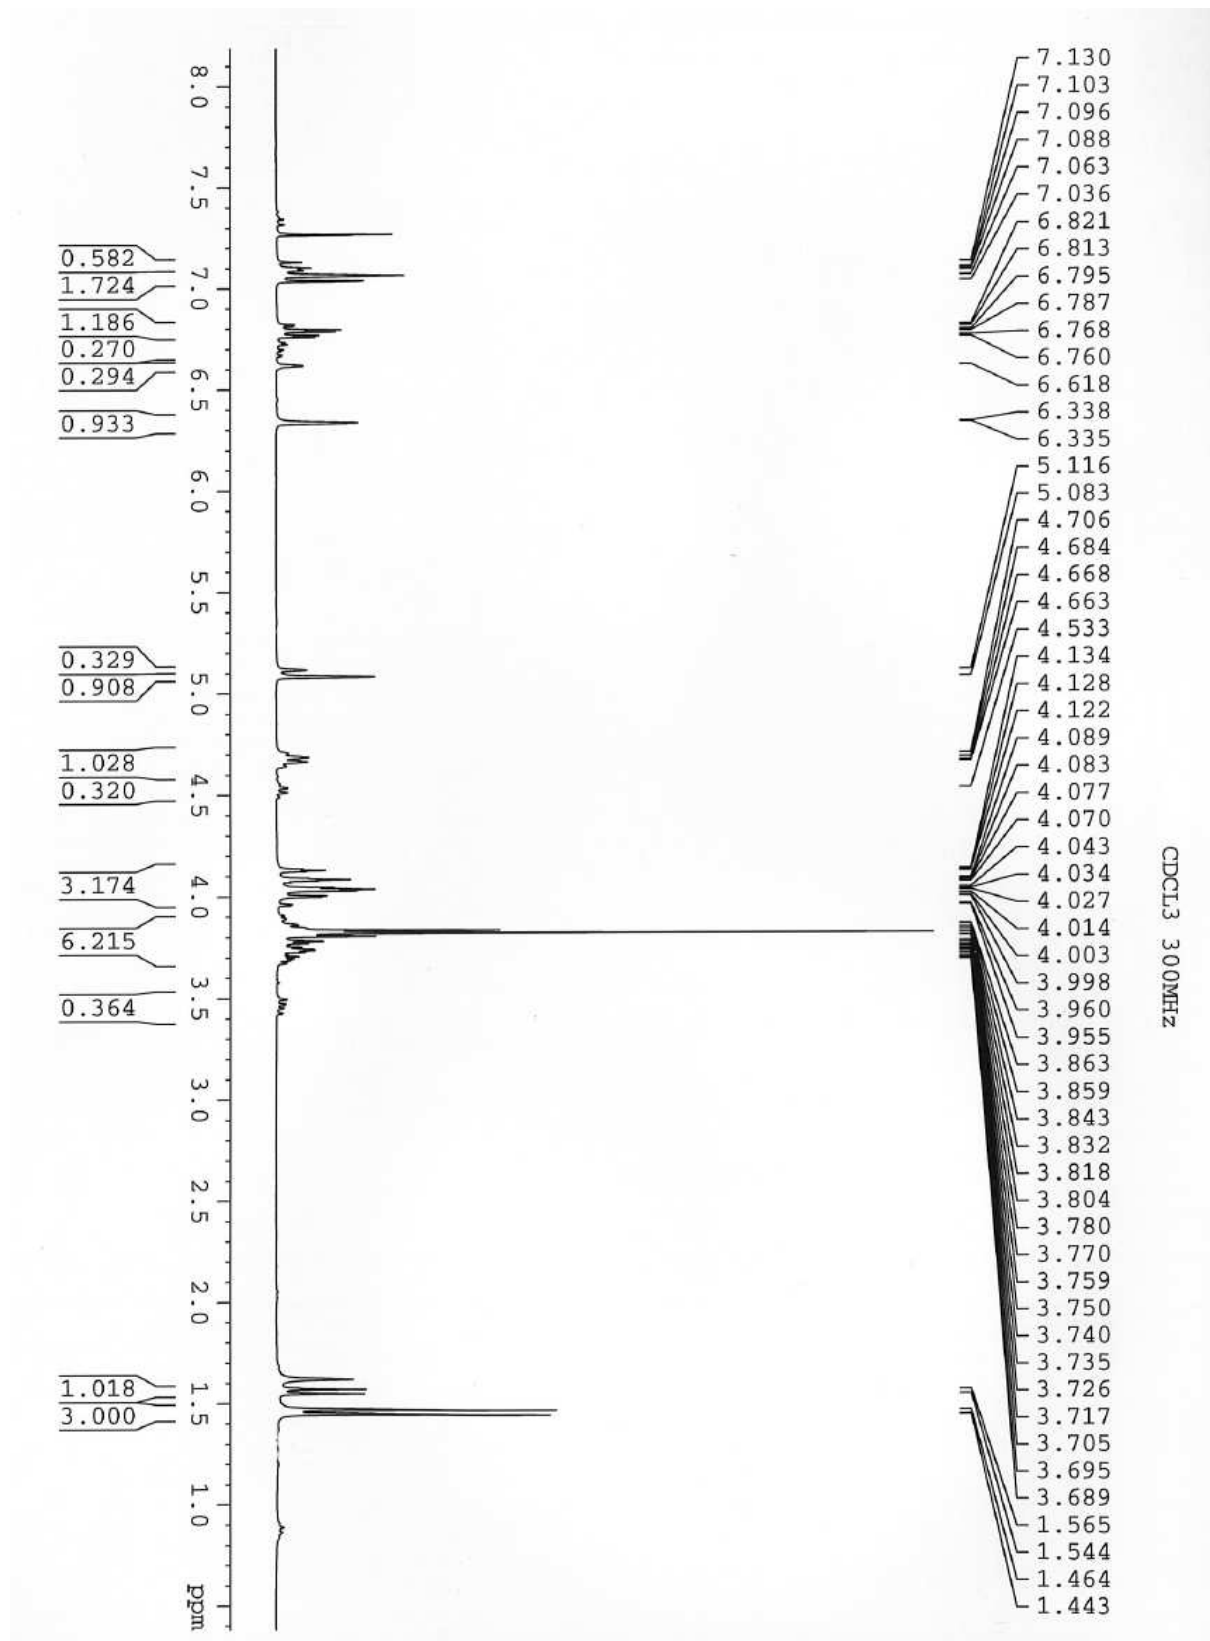

$^{13}\text{C}$  NMR of *cis/trans*-6b

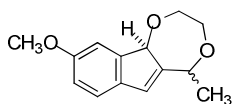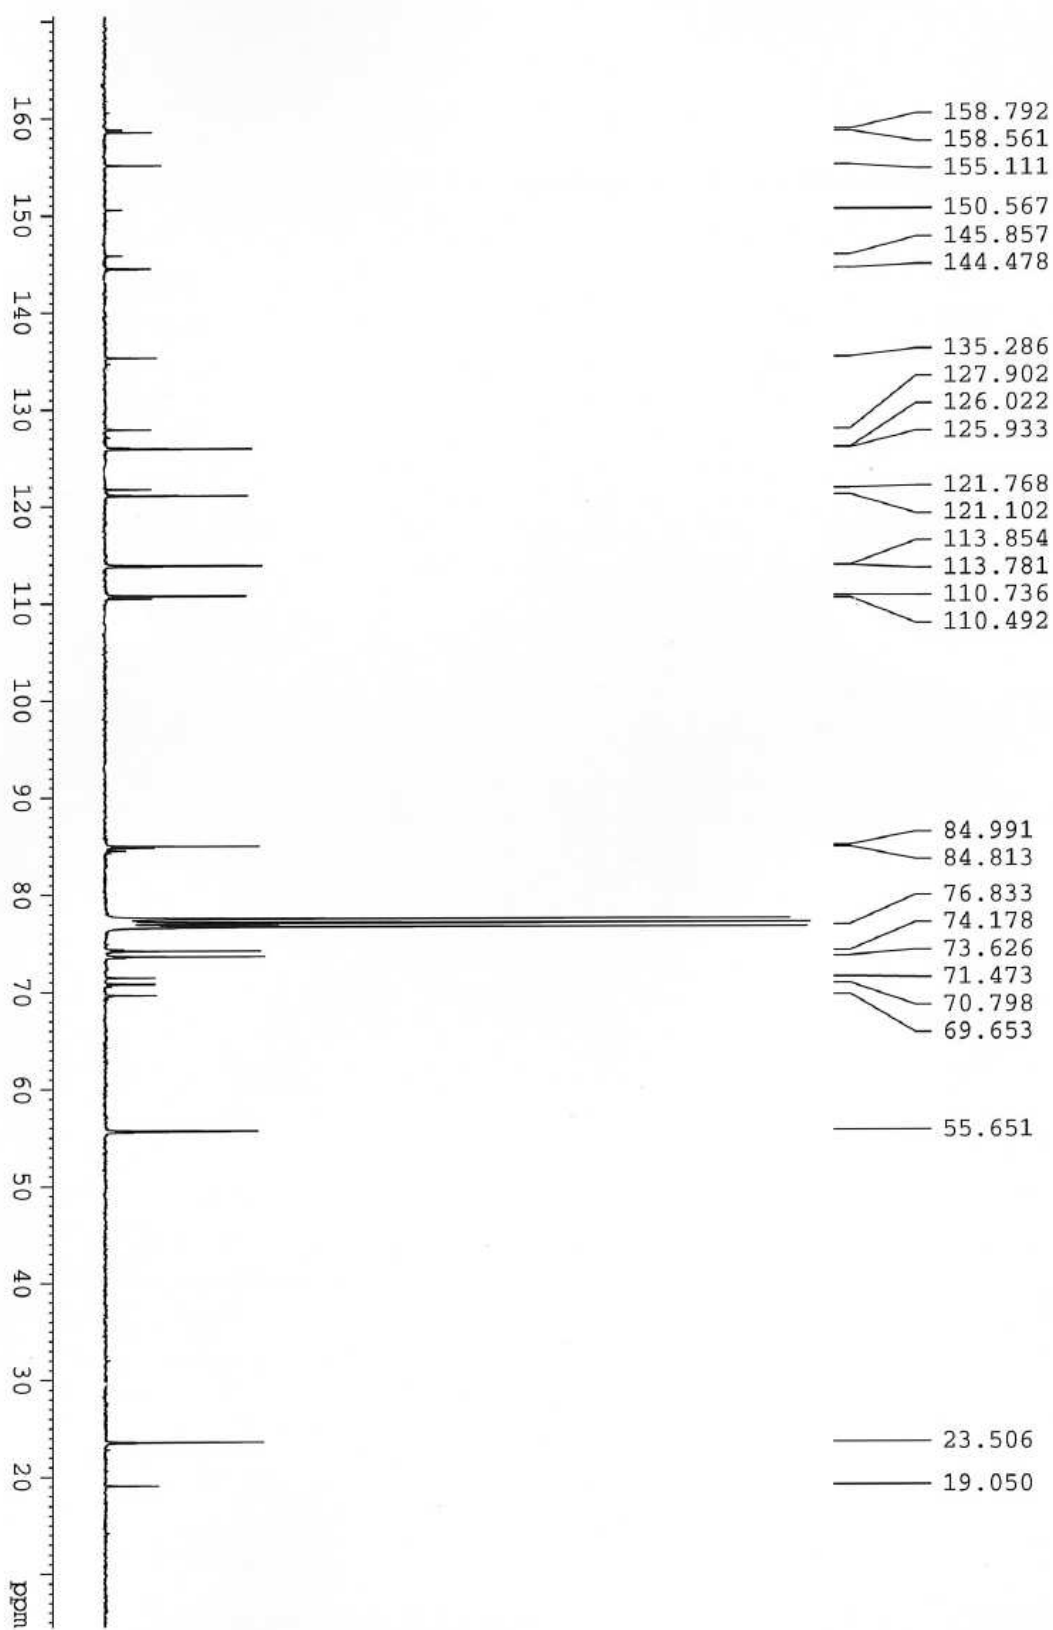

$\text{CDCl}_3$  300MHz



$^1\text{H}$  NMR of *trans*-6c

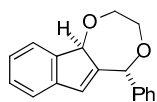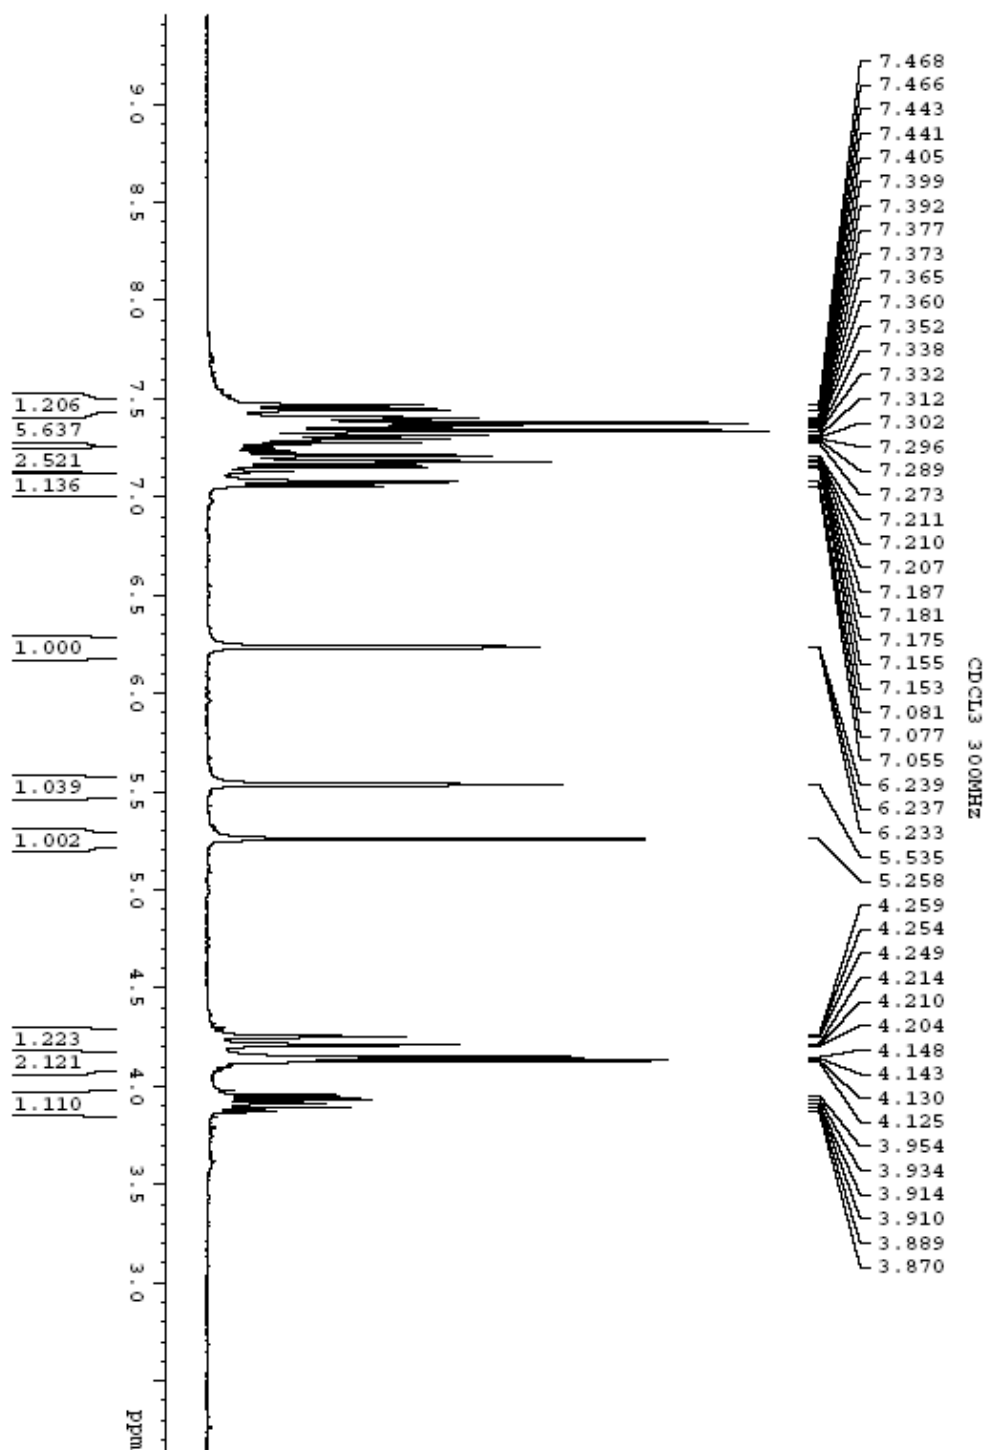

$^{13}\text{C}$  NMR of *trans*-6c

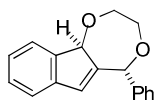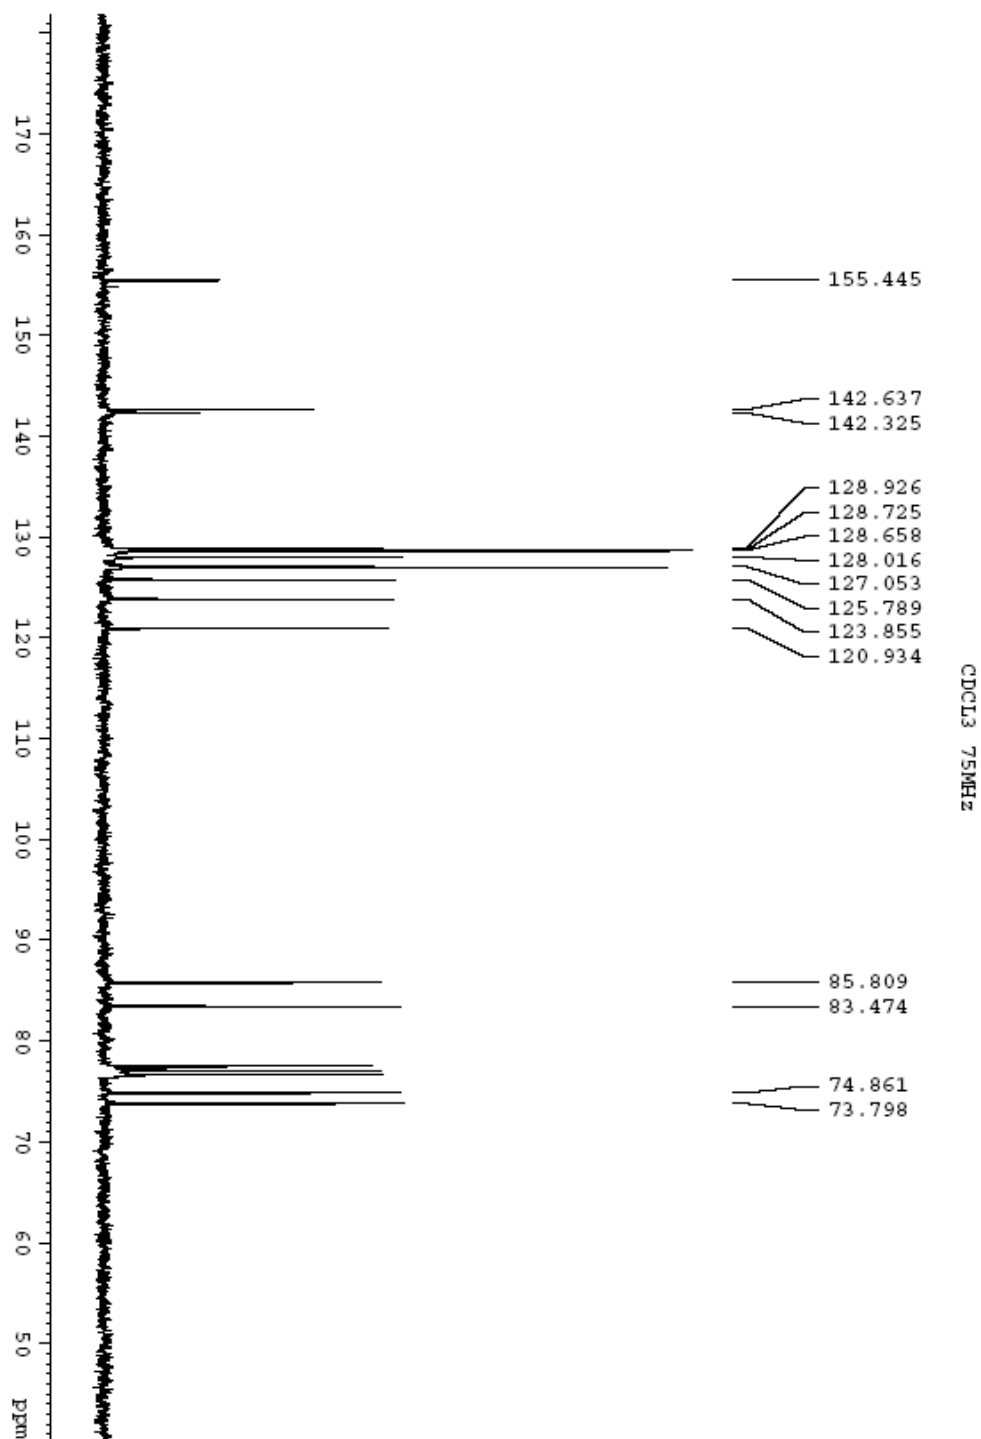

$^1\text{H}$  NMR of *trans*-7a

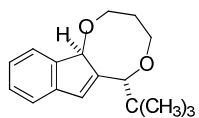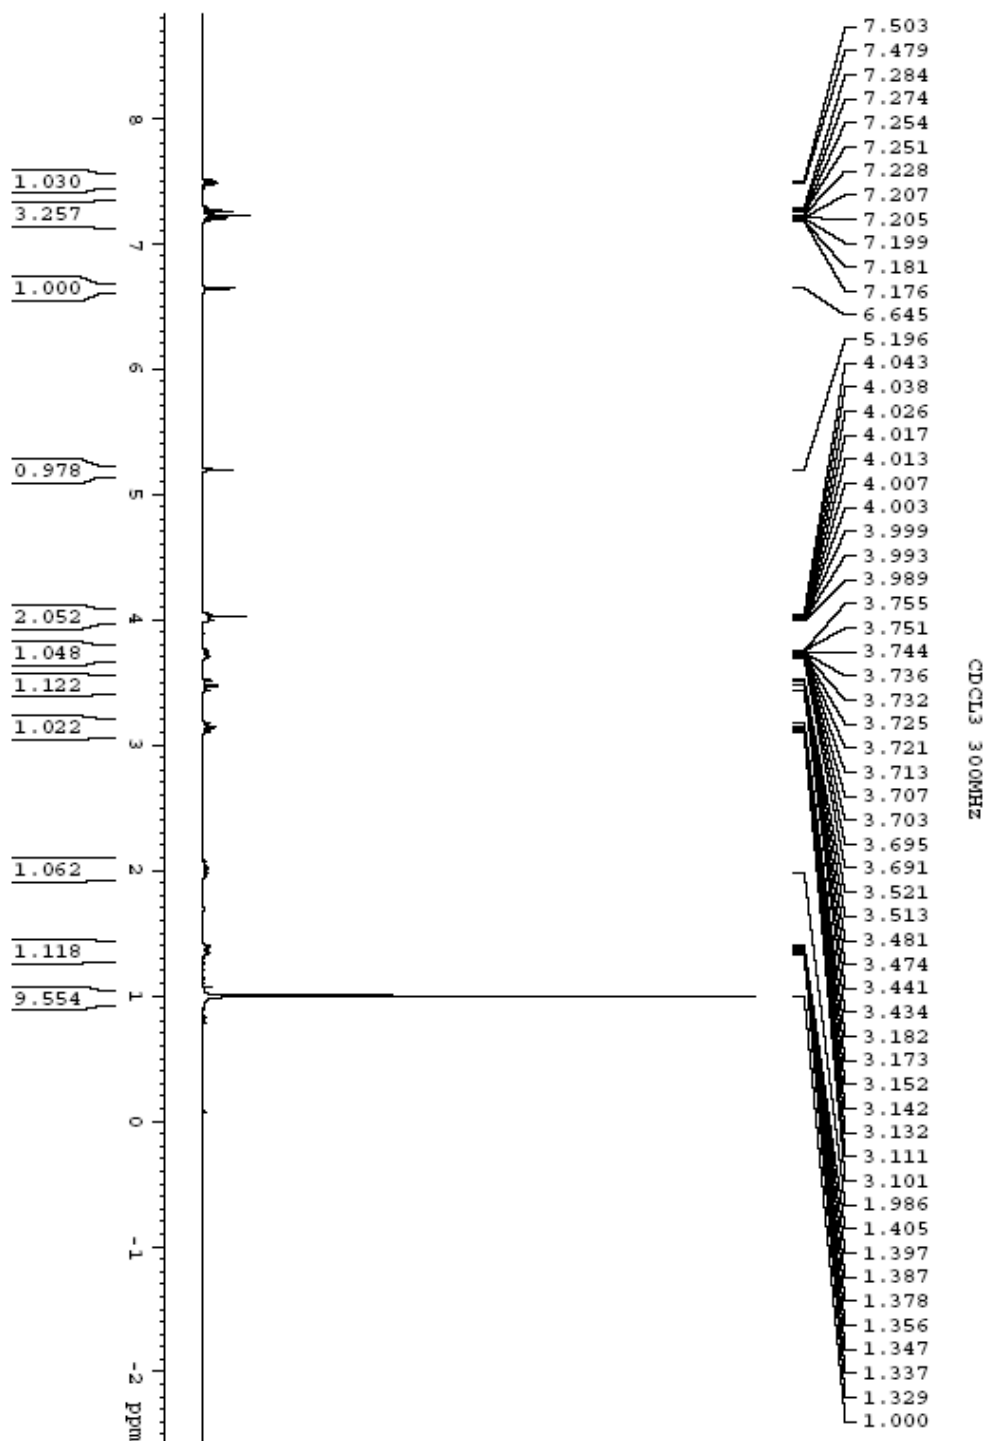

$^{13}\text{C}$  NMR of *trans*-7a

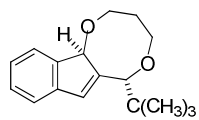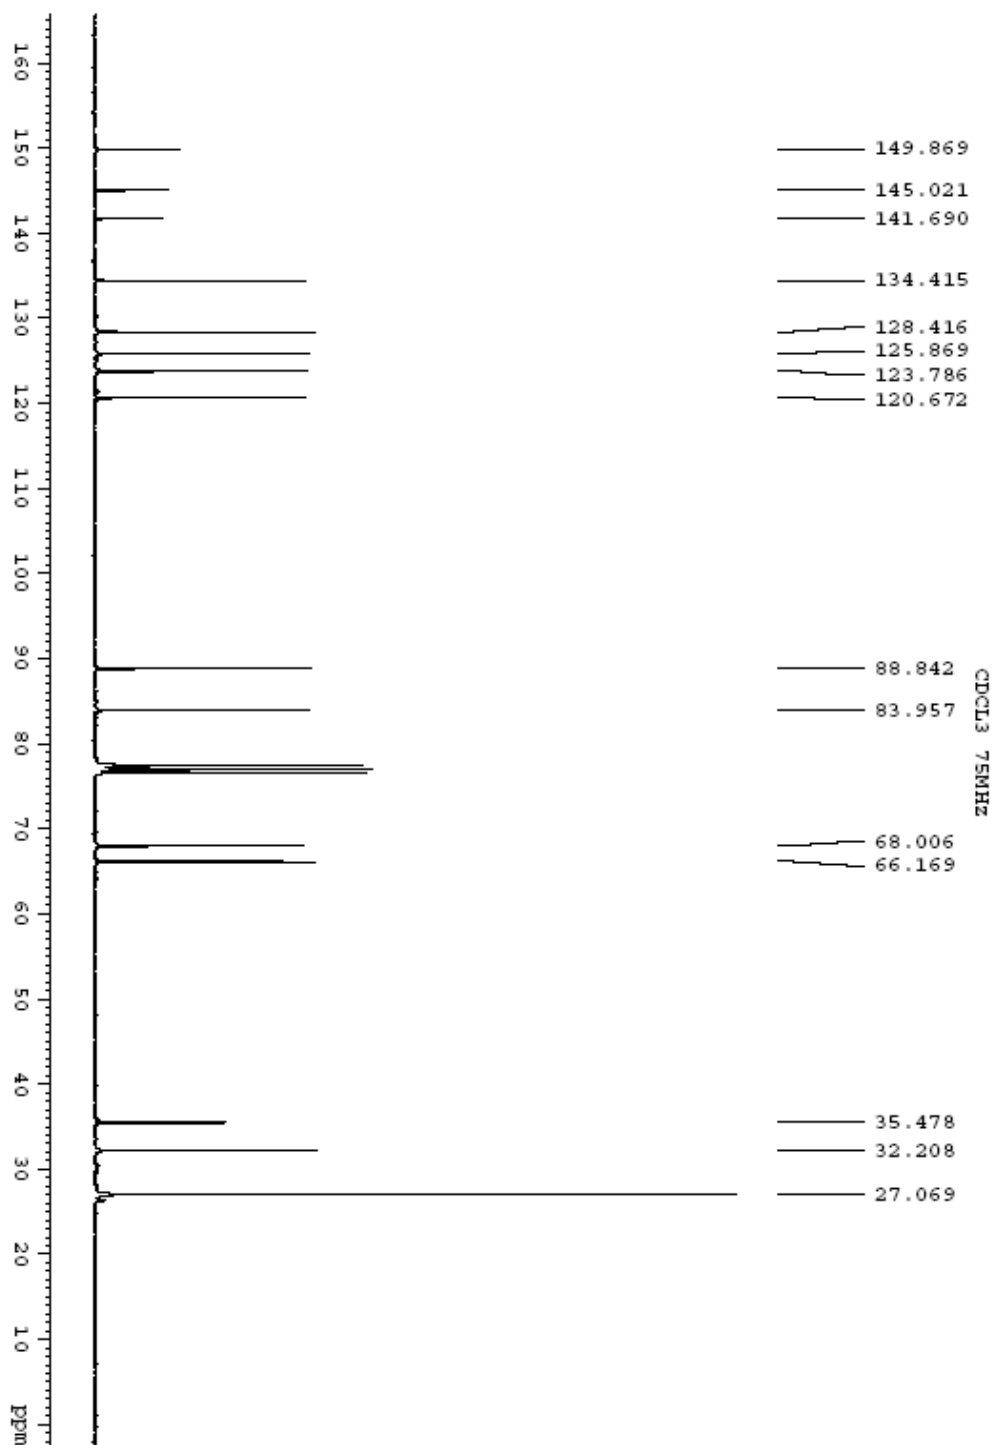

<sup>1</sup>H NMR of *cis/trans*-7b

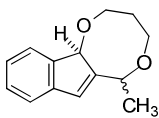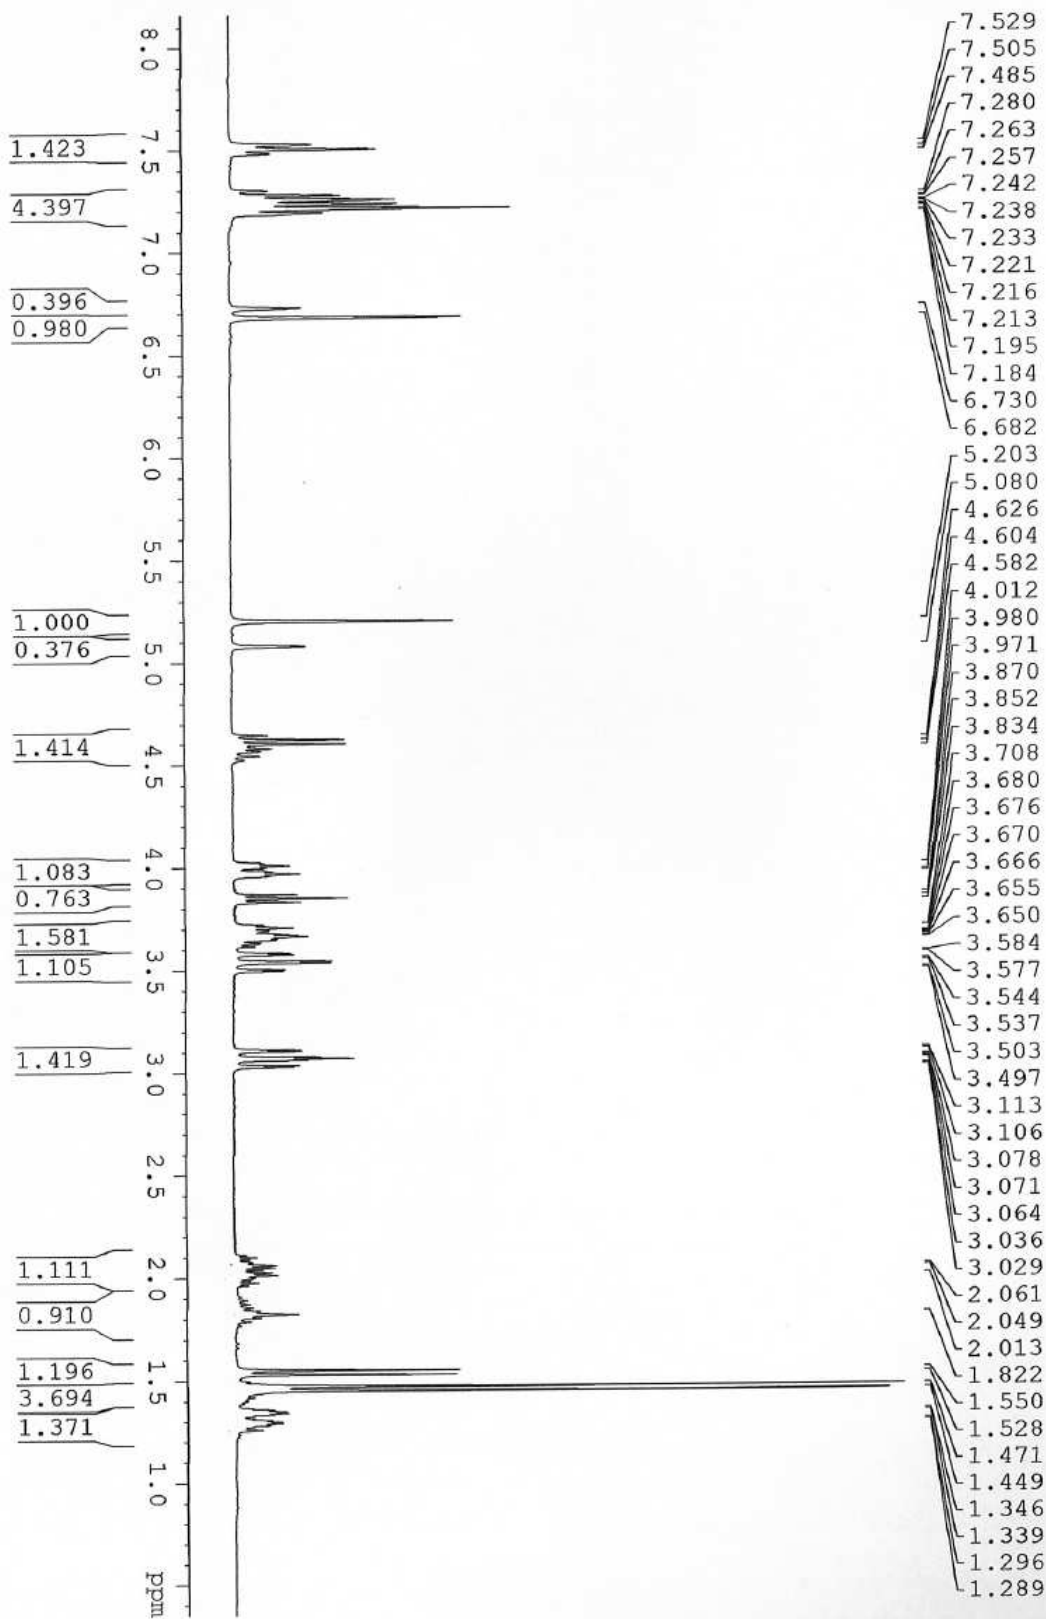

CDCl<sub>3</sub> 300MHz

<sup>13</sup>C NMR of *cis/trans*-7b

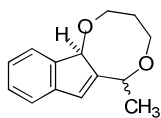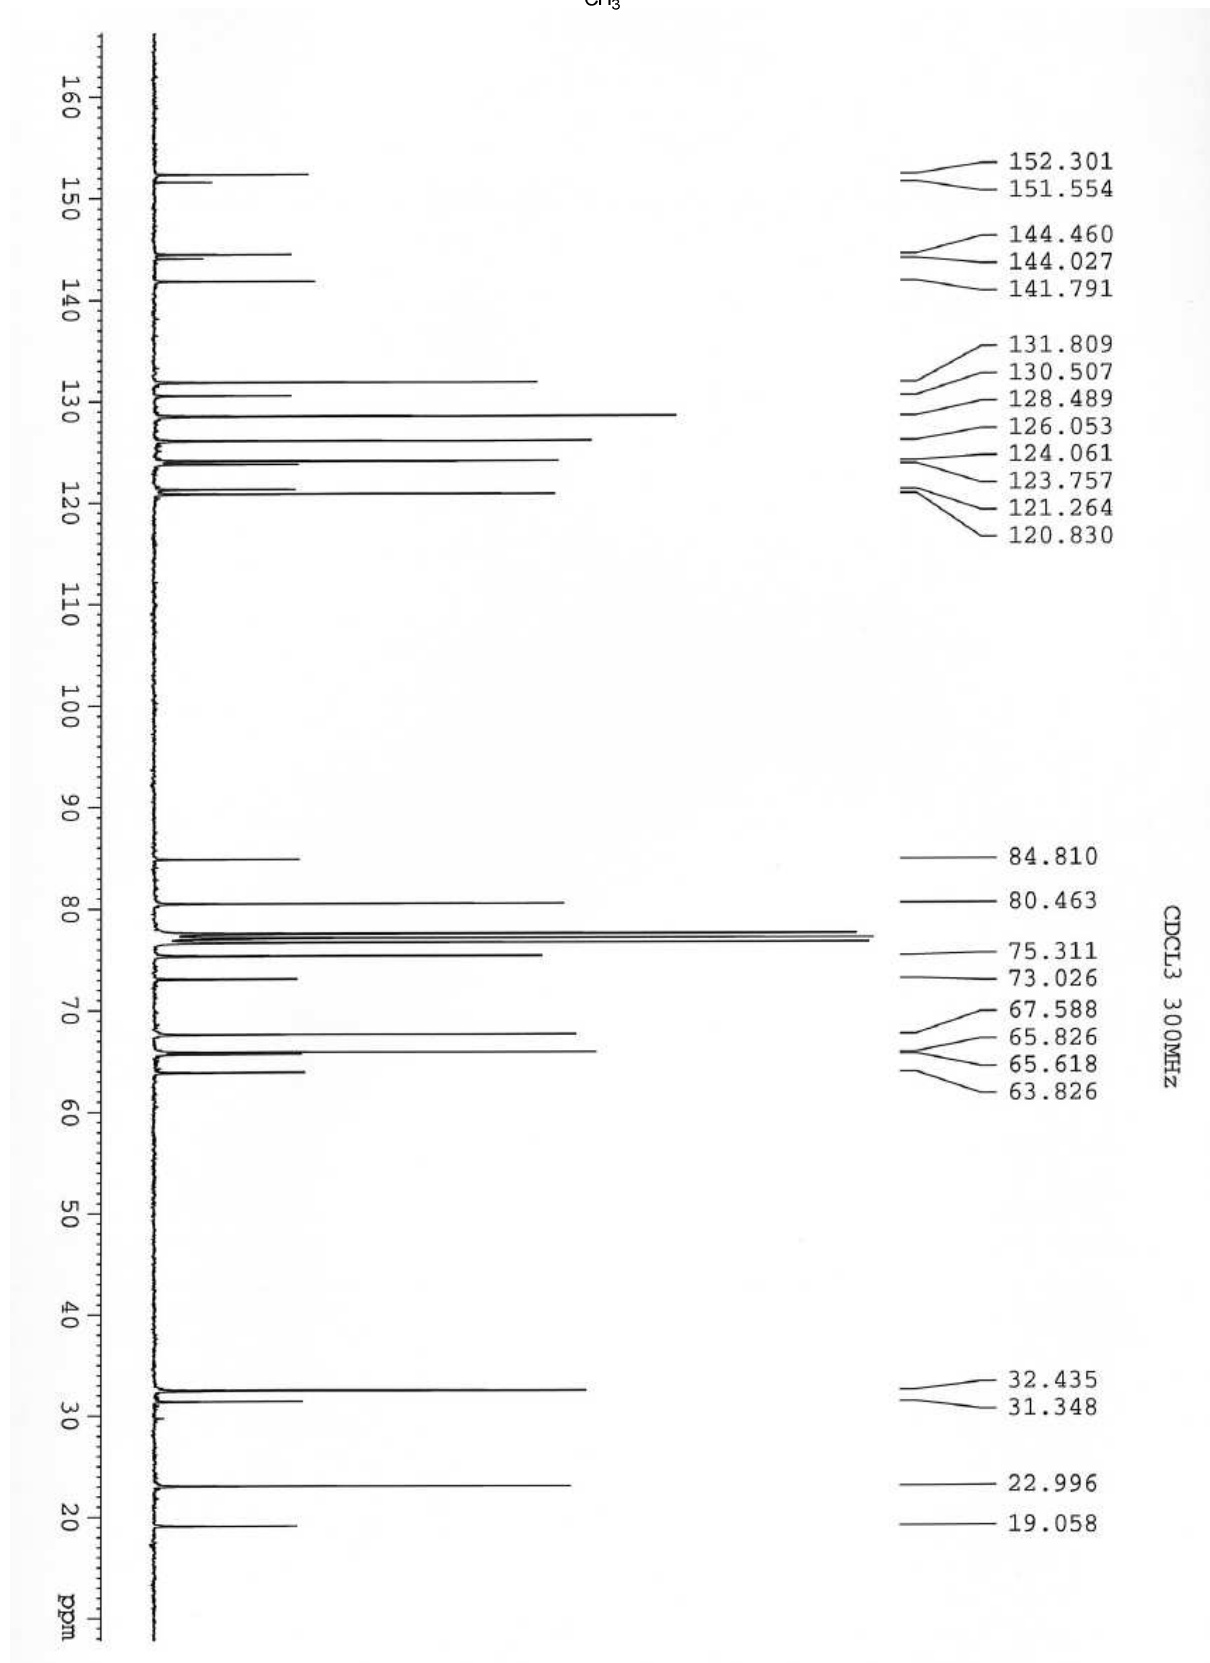

$^1\text{H}$  NMR of *cis*-8

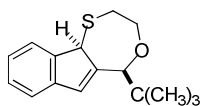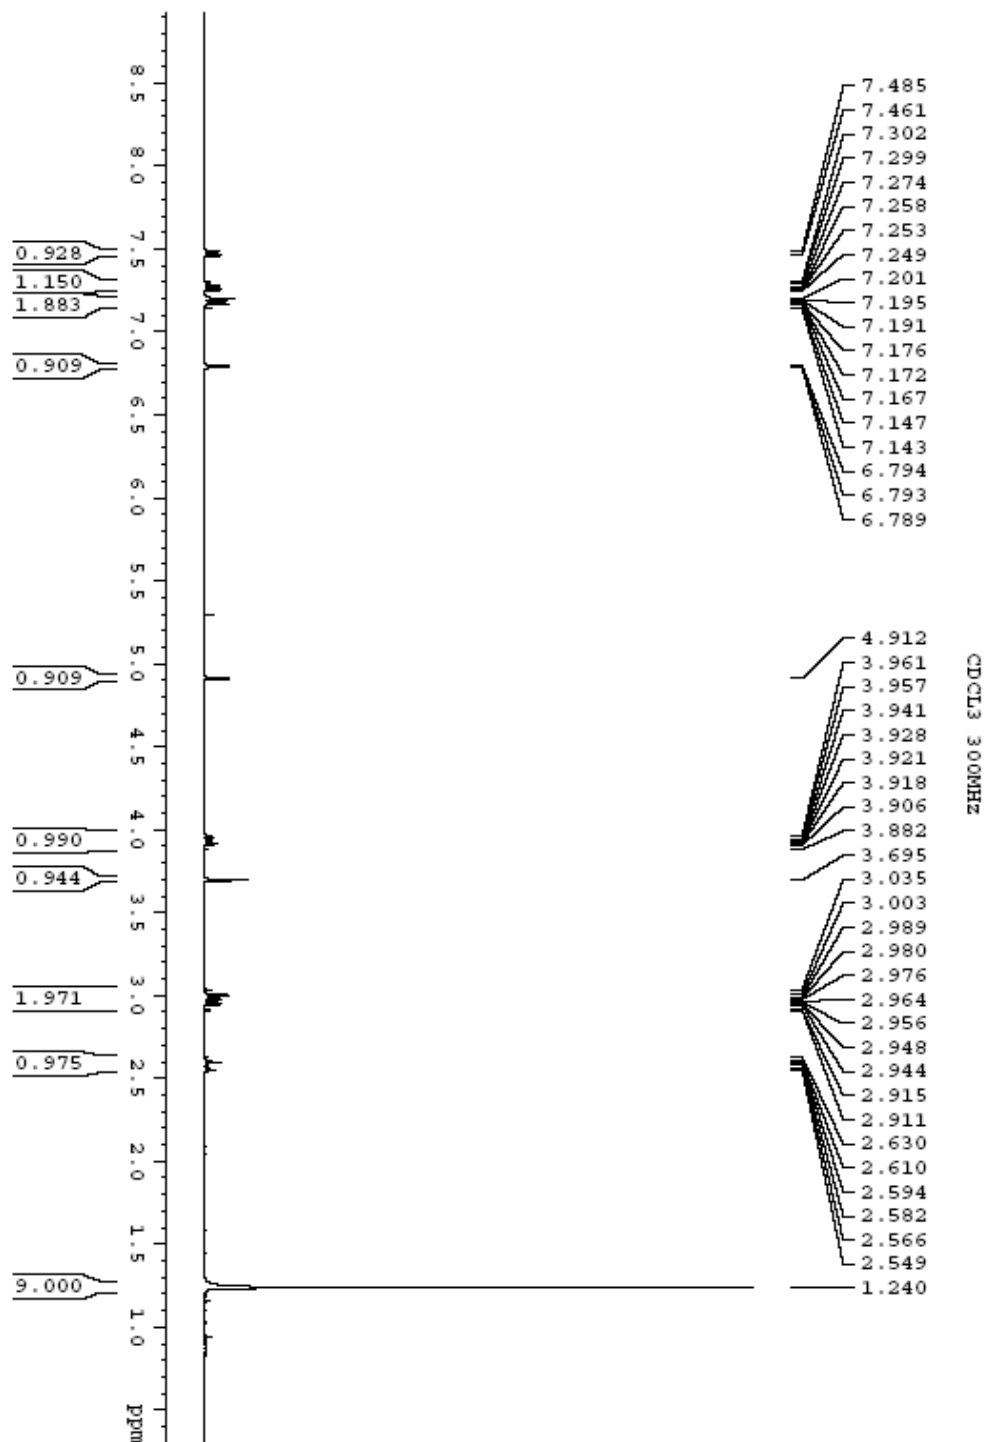

$^{13}\text{C}$  NMR of *cis*-8

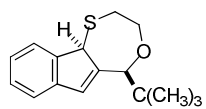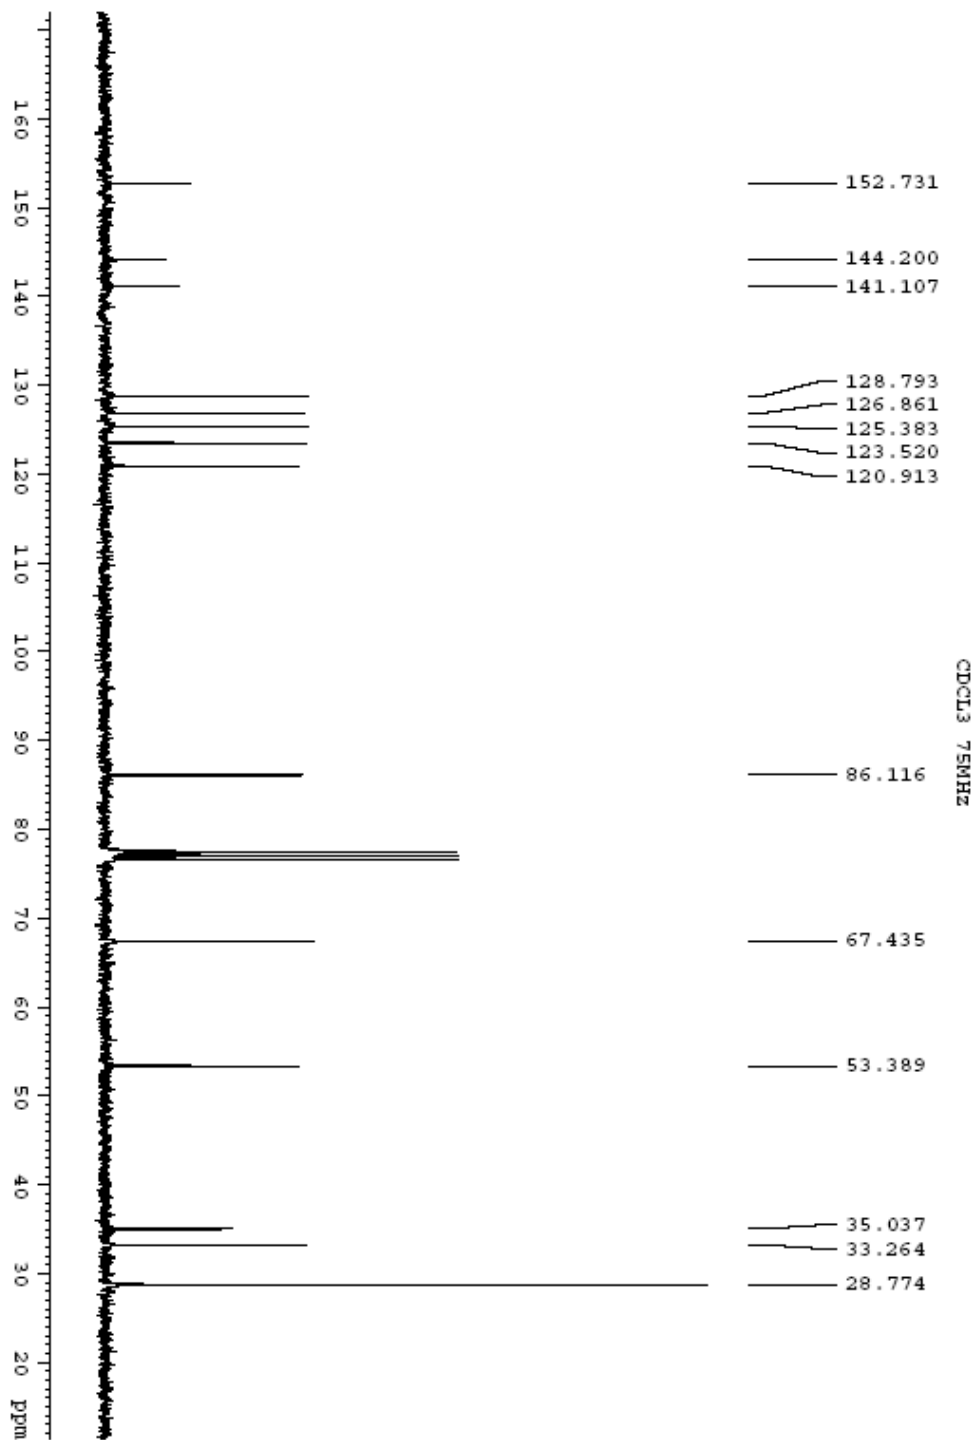



<sup>1</sup>H NMR of *cis*-9

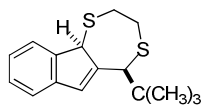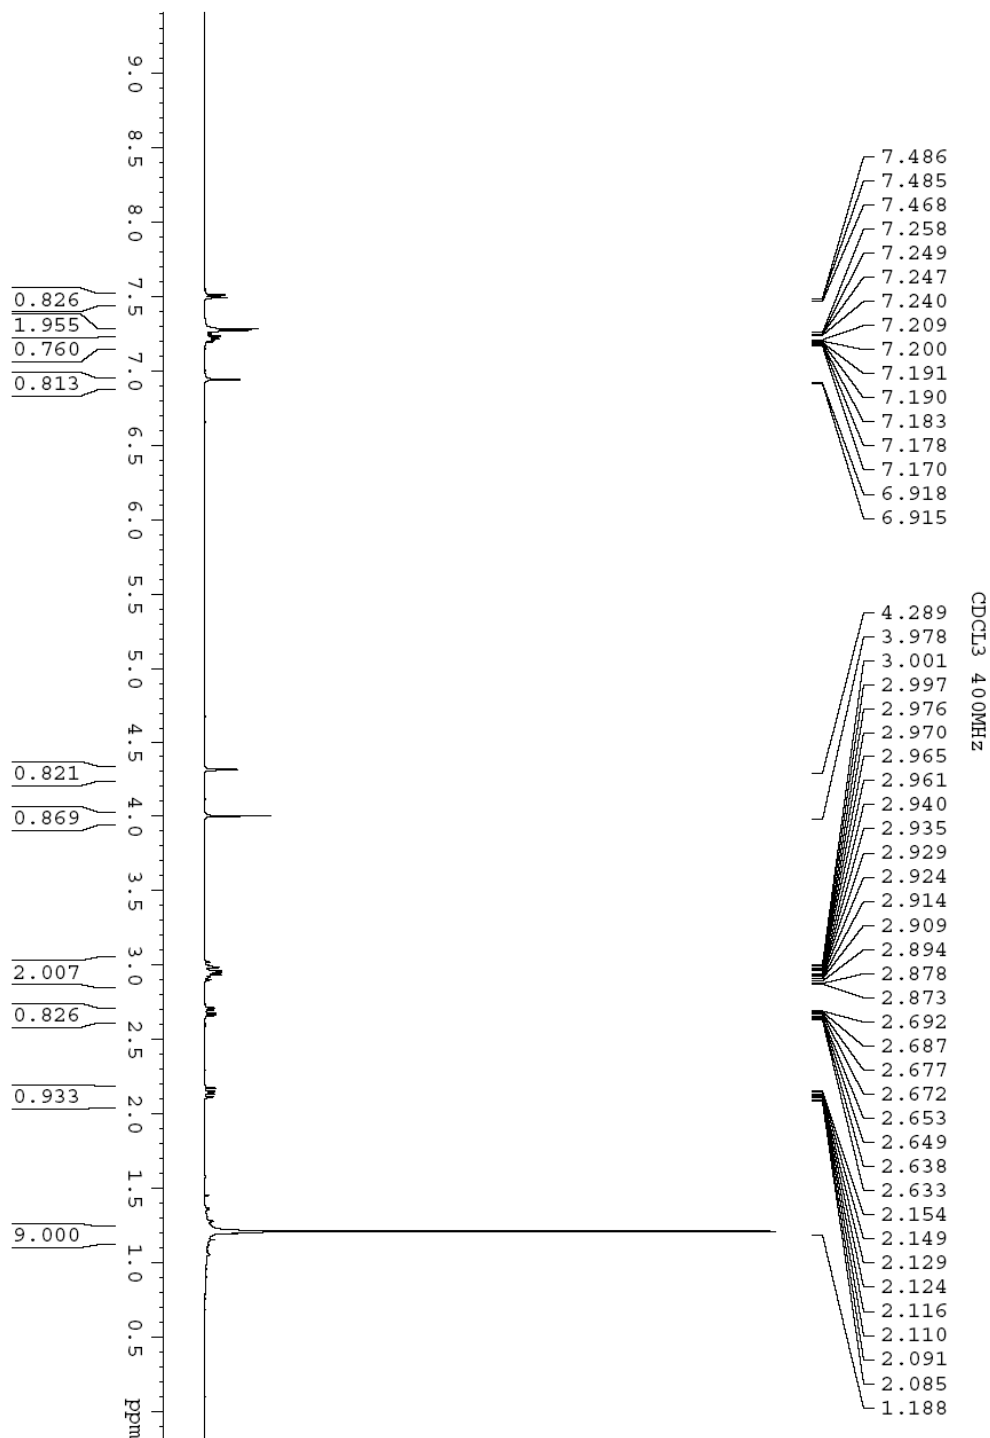

$^{13}\text{C}$  NMR of *cis*-9

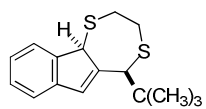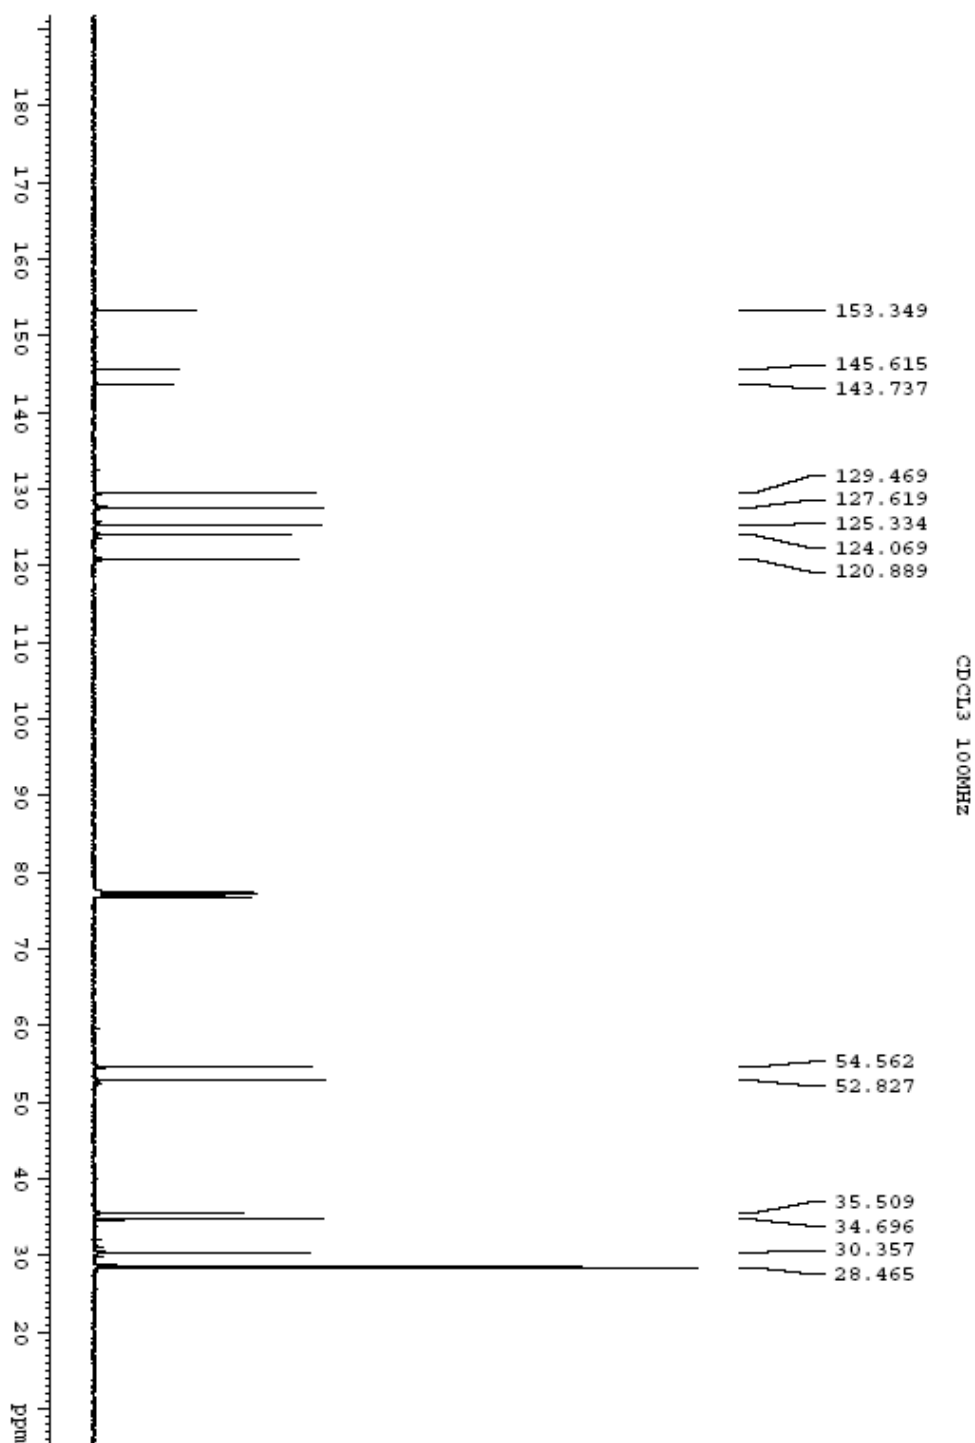

<sup>1</sup>H NMR of 10

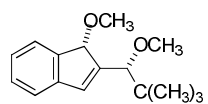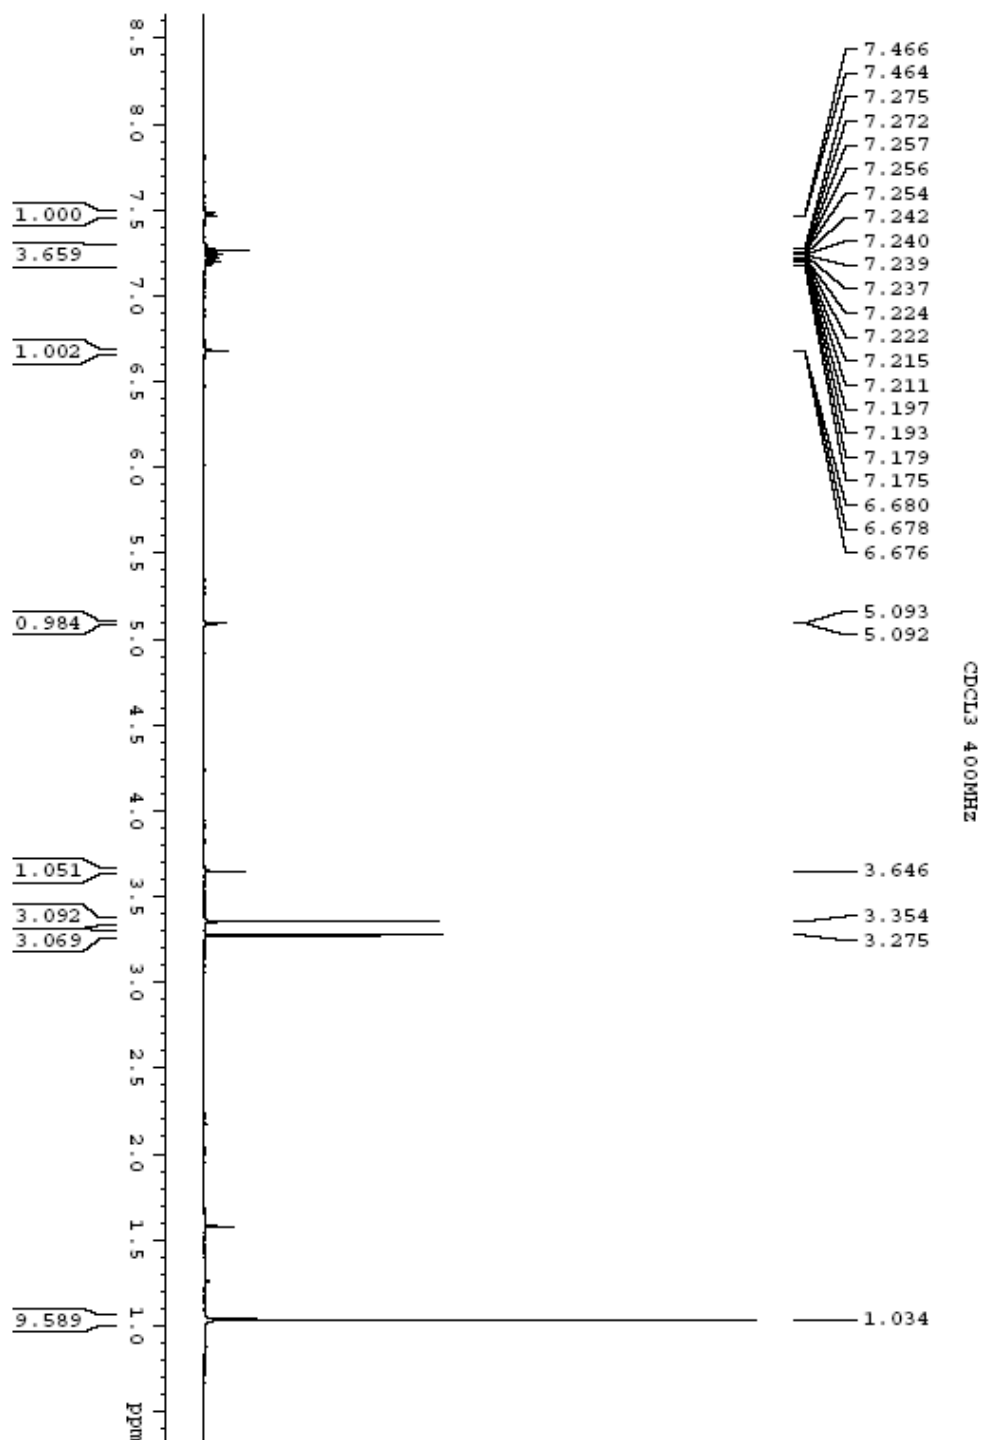

$^{13}\text{C}$  NMR of **10**

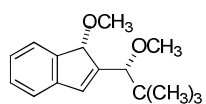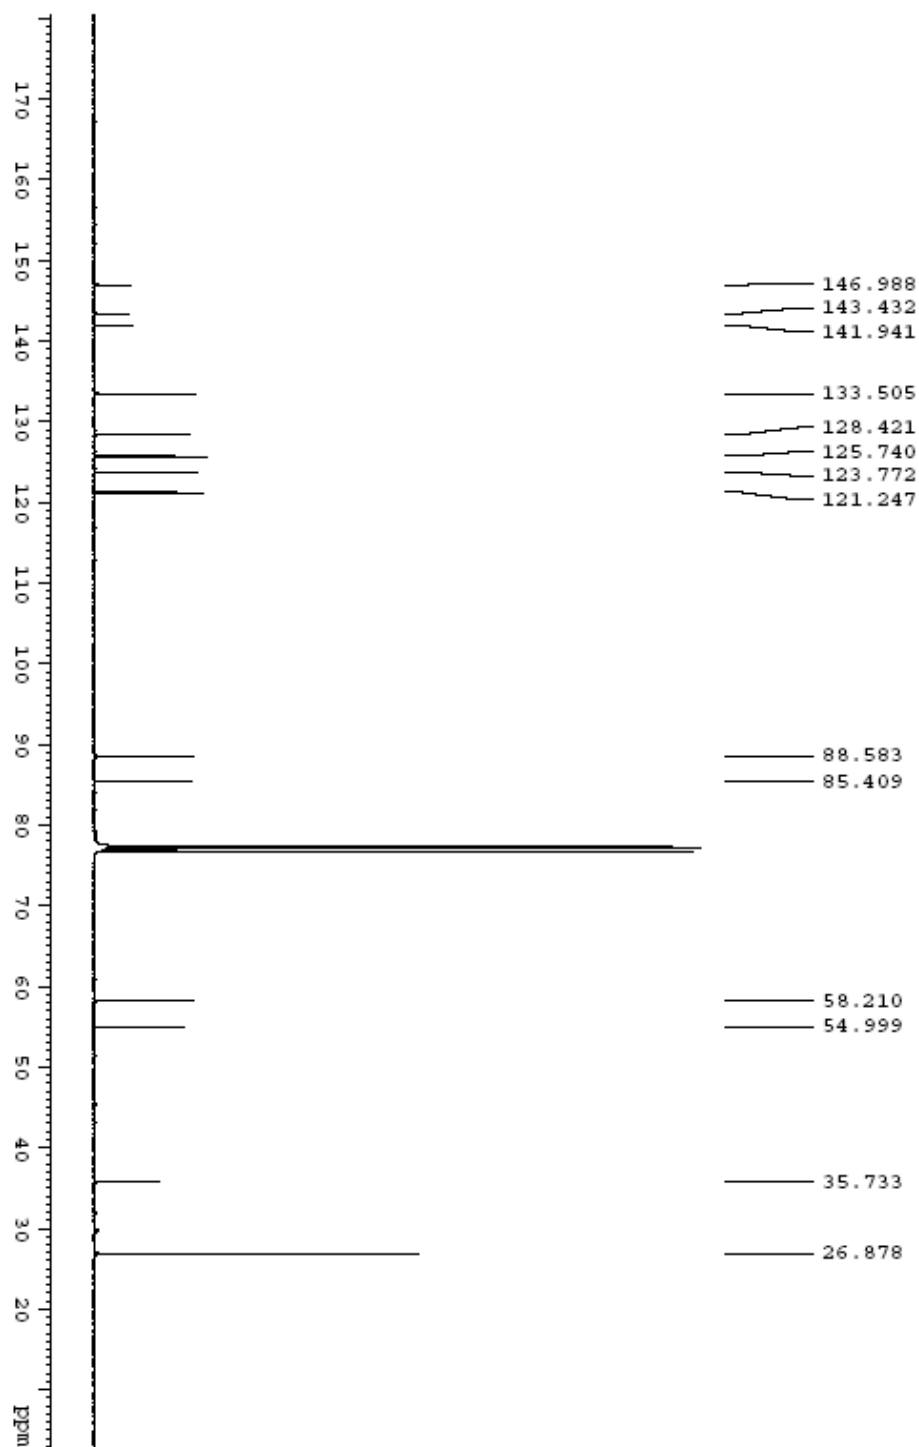

$\text{CDCl}_3$  100MHz

<sup>1</sup>H NMR of 11

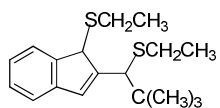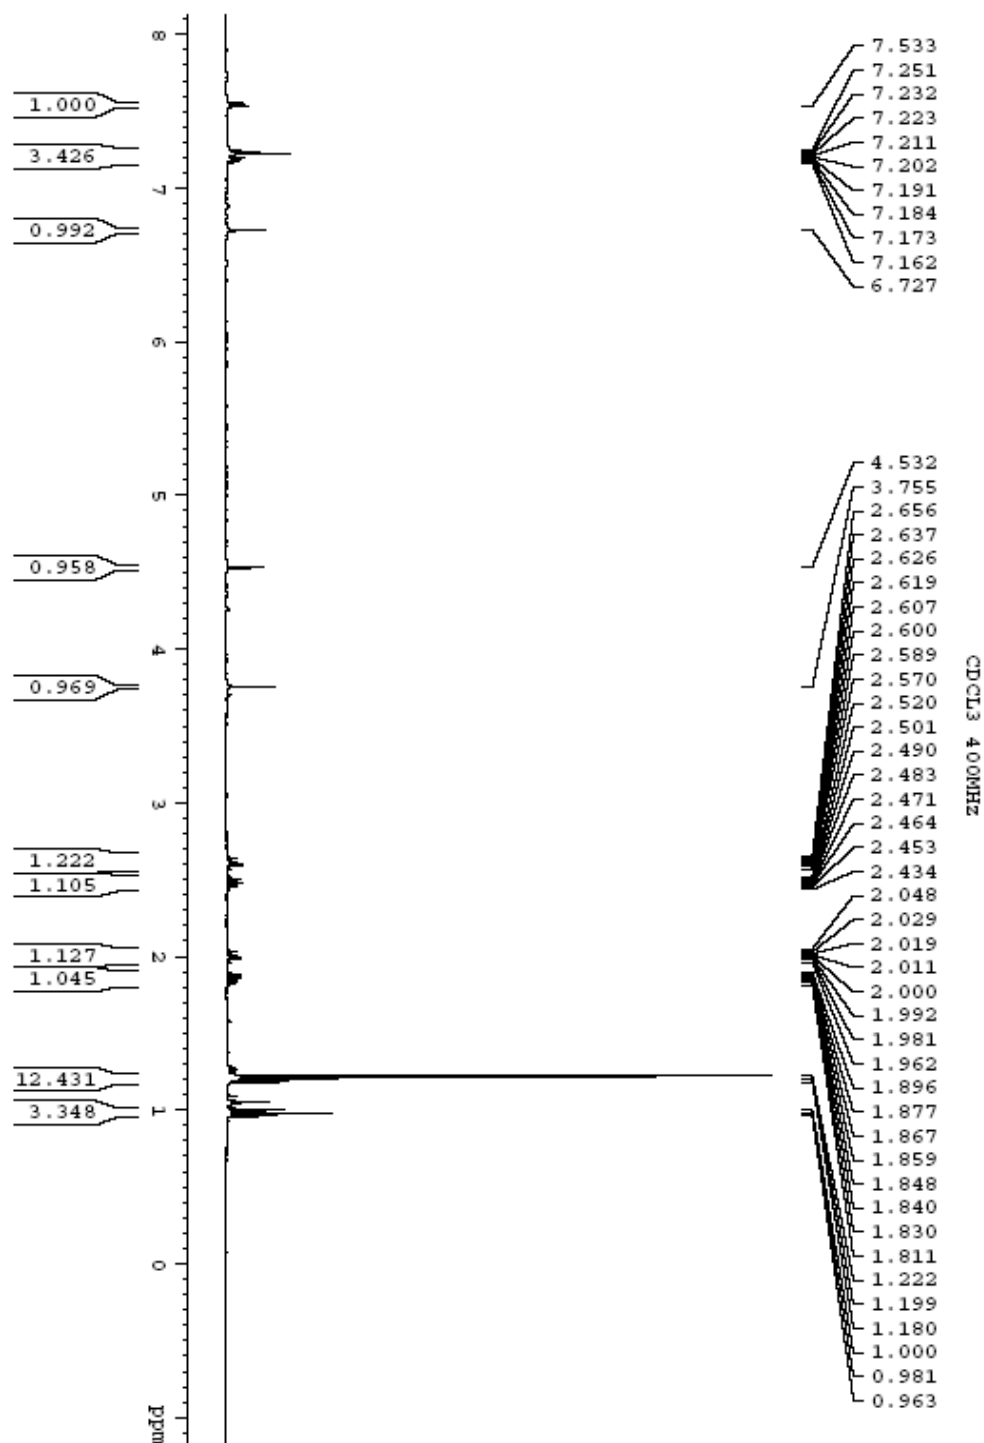

$^{13}\text{C}$  NMR of **11**

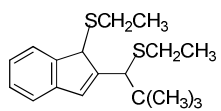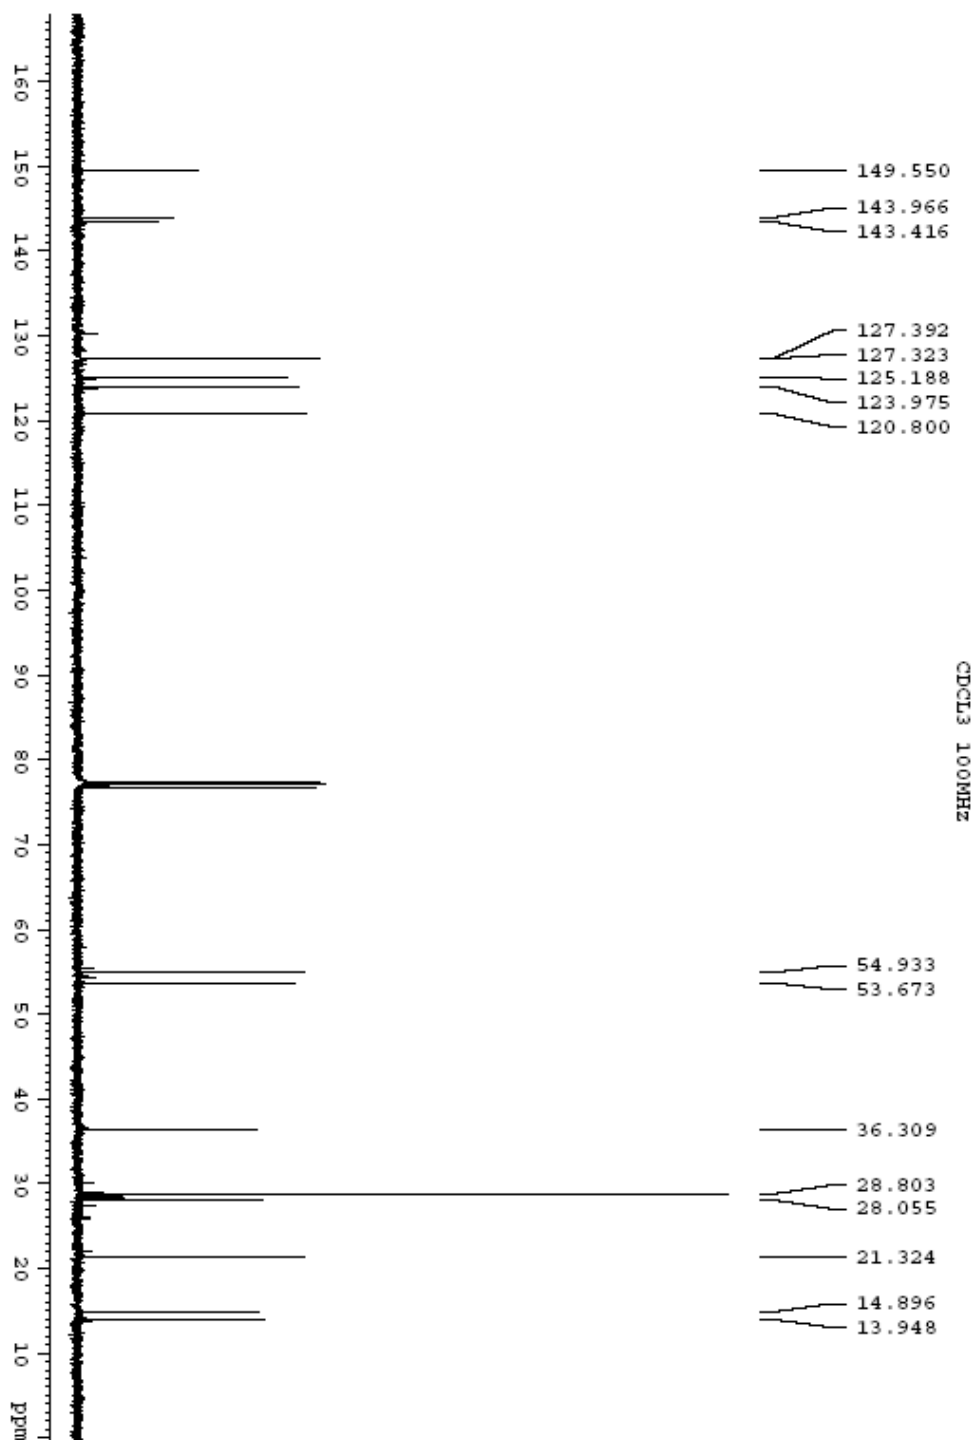

<sup>1</sup>H NMR of 12a

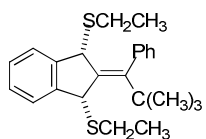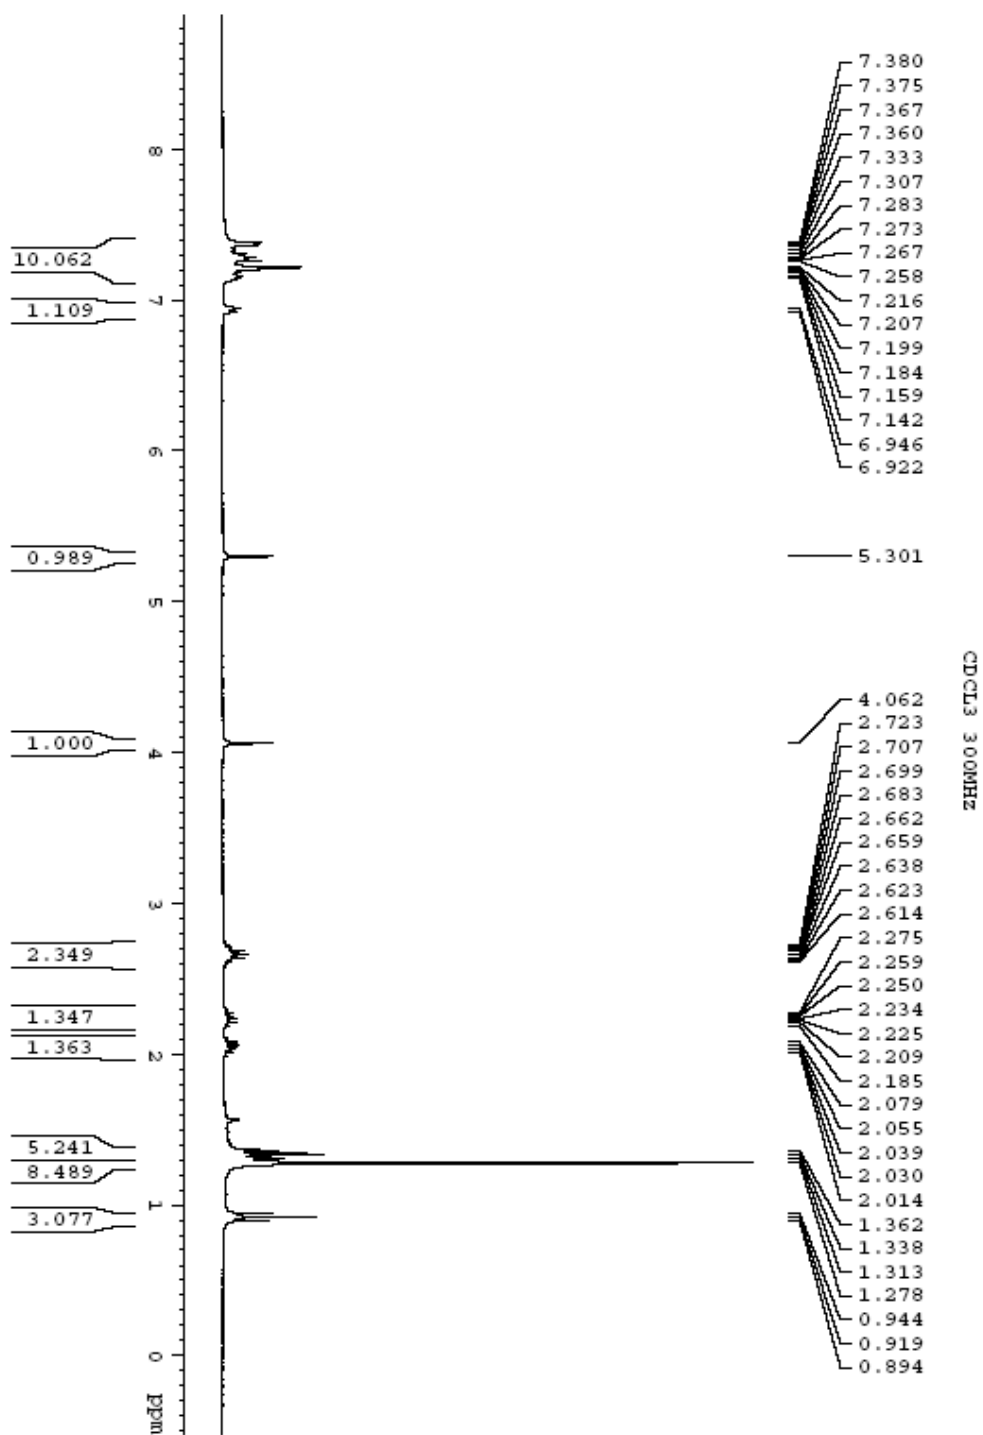

$^{13}\text{C}$  NMR of 12a

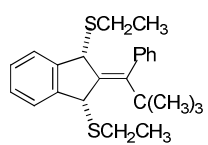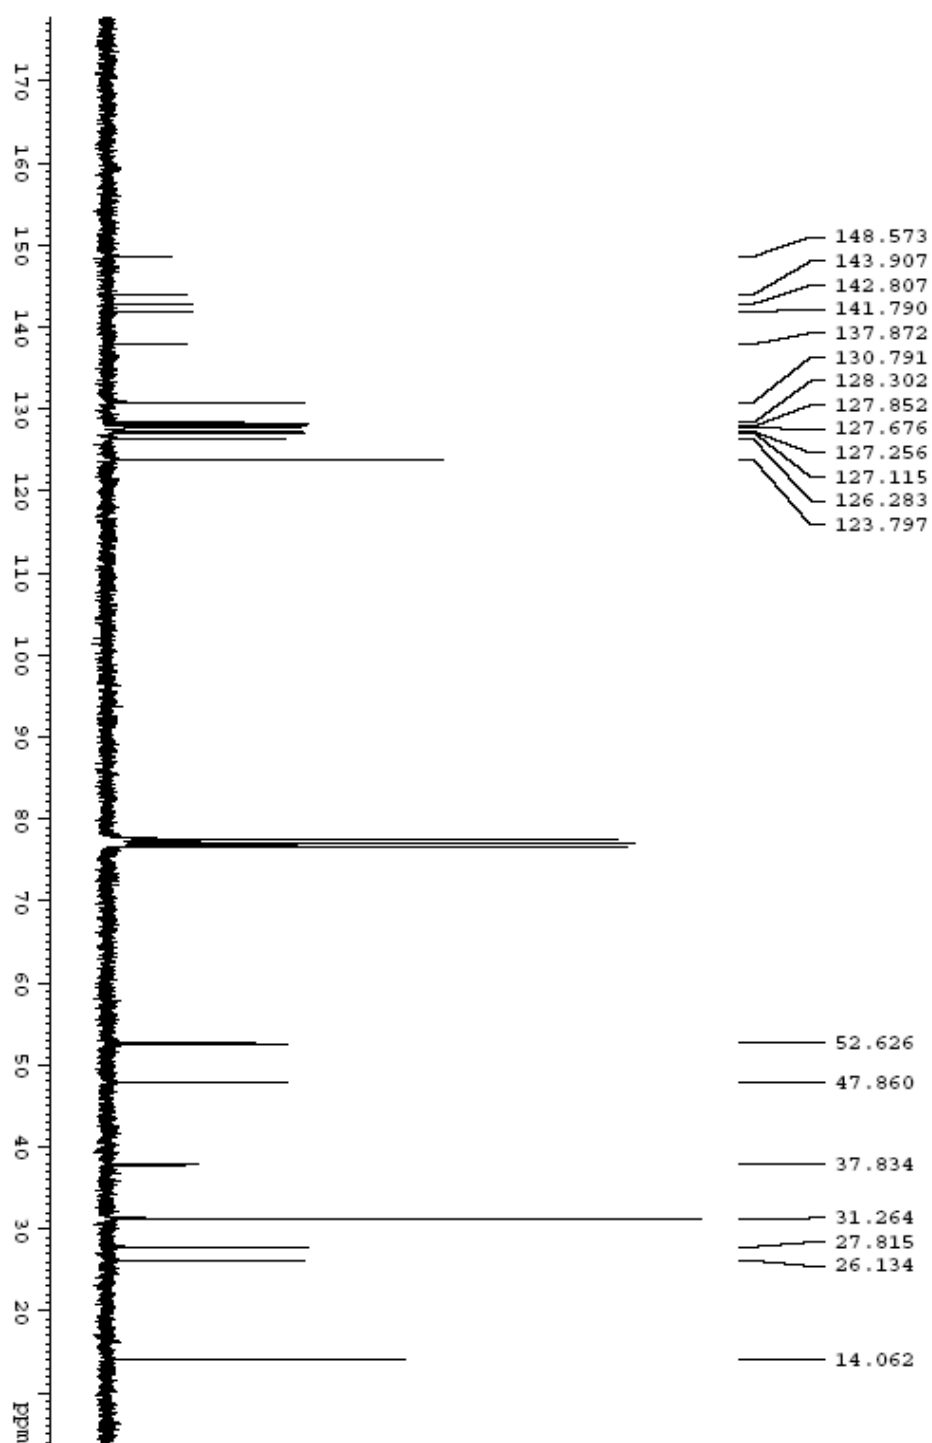

CDCl<sub>3</sub> 75MHz



<sup>1</sup>H NMR of **12b**

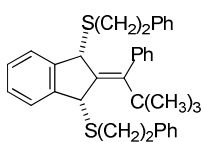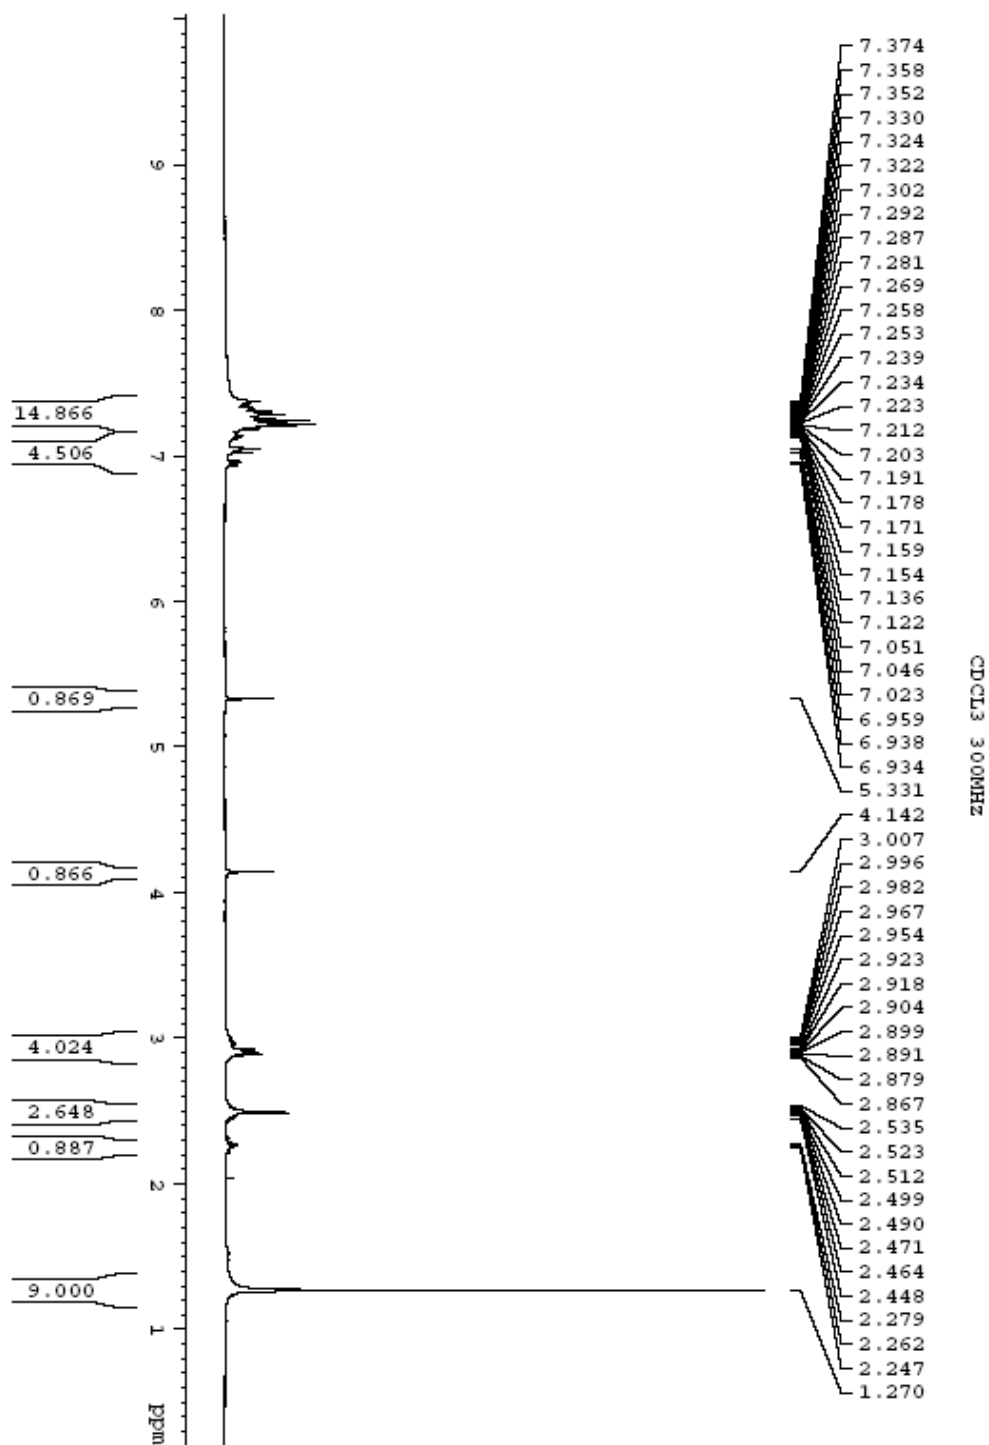

$^{13}\text{C}$  NMR of **12b**

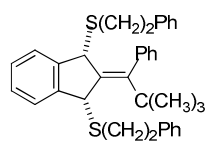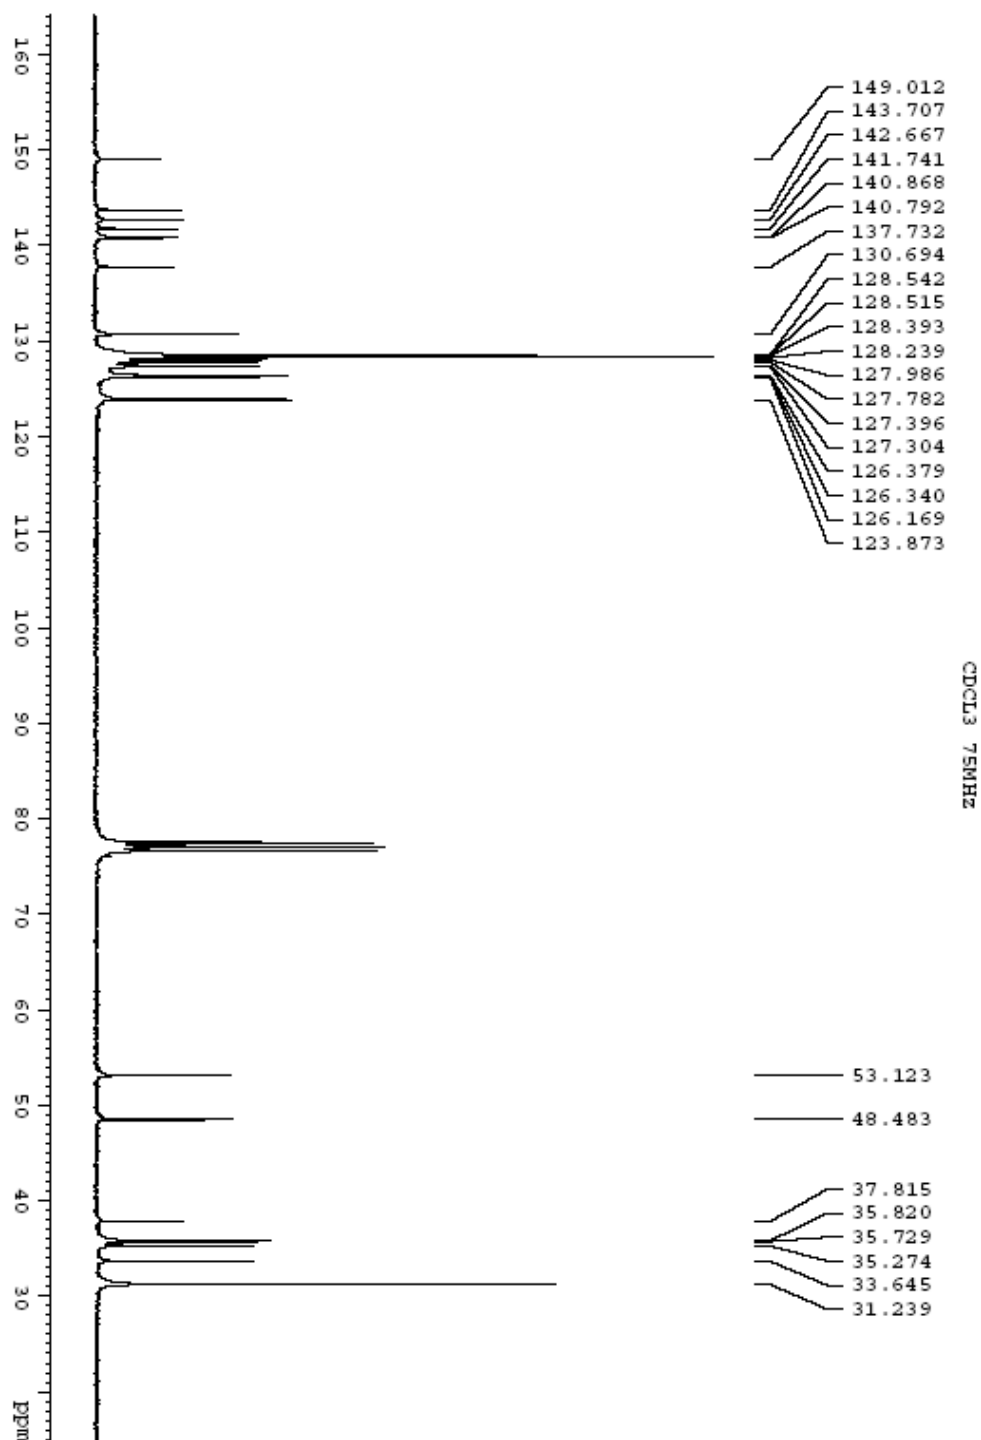

<sup>1</sup>H NMR of 12c

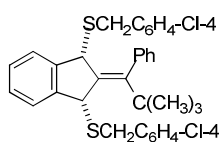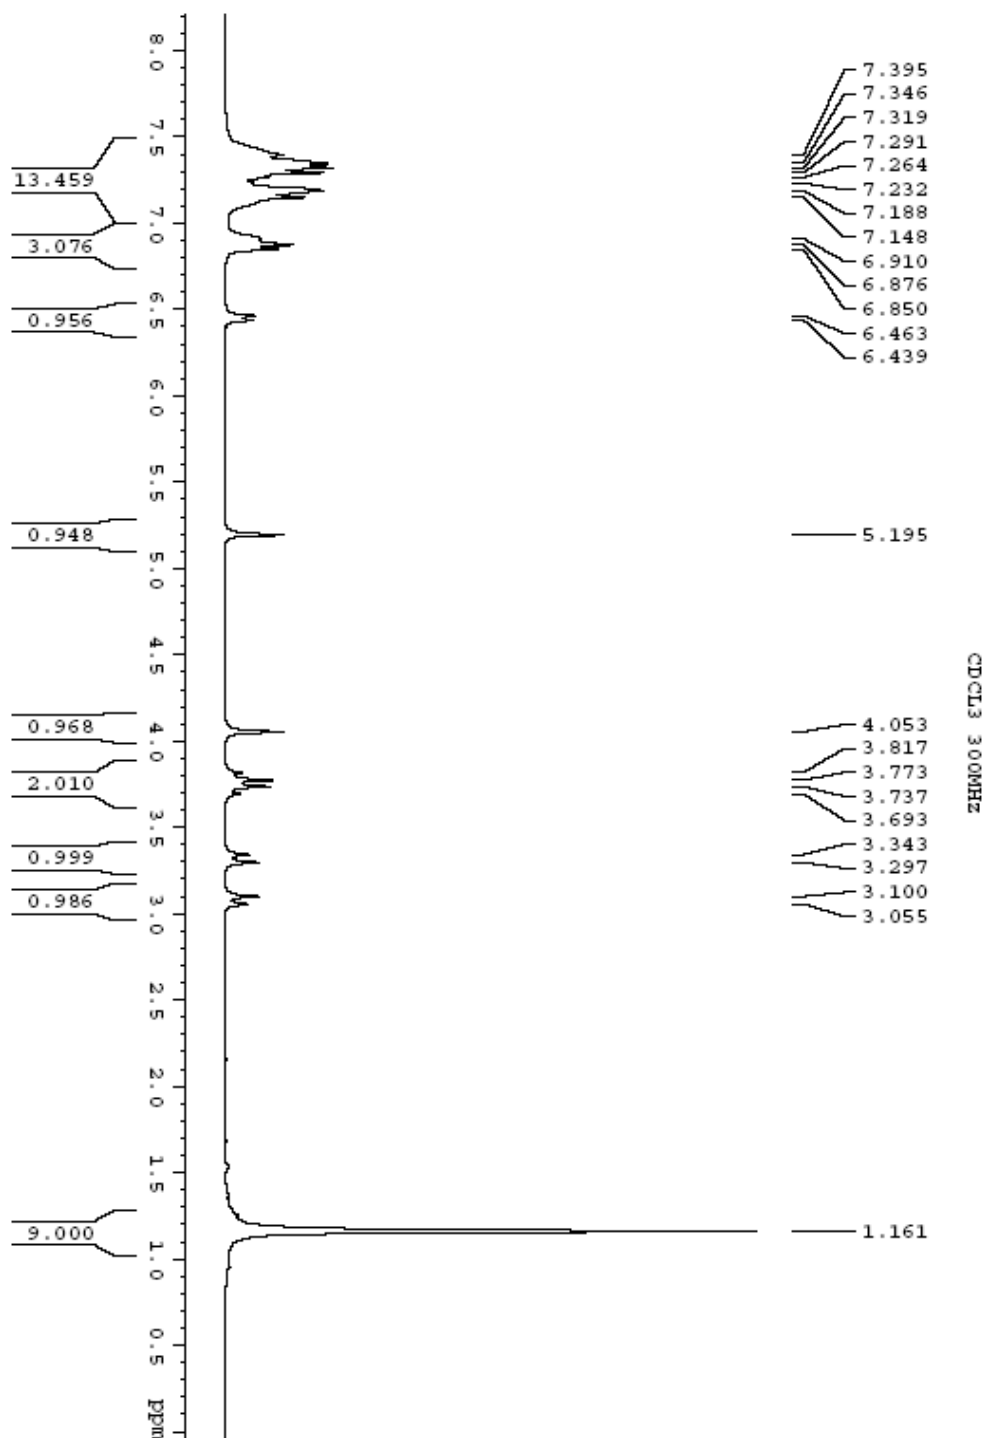

$^{13}\text{C}$  NMR of 12c

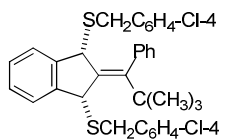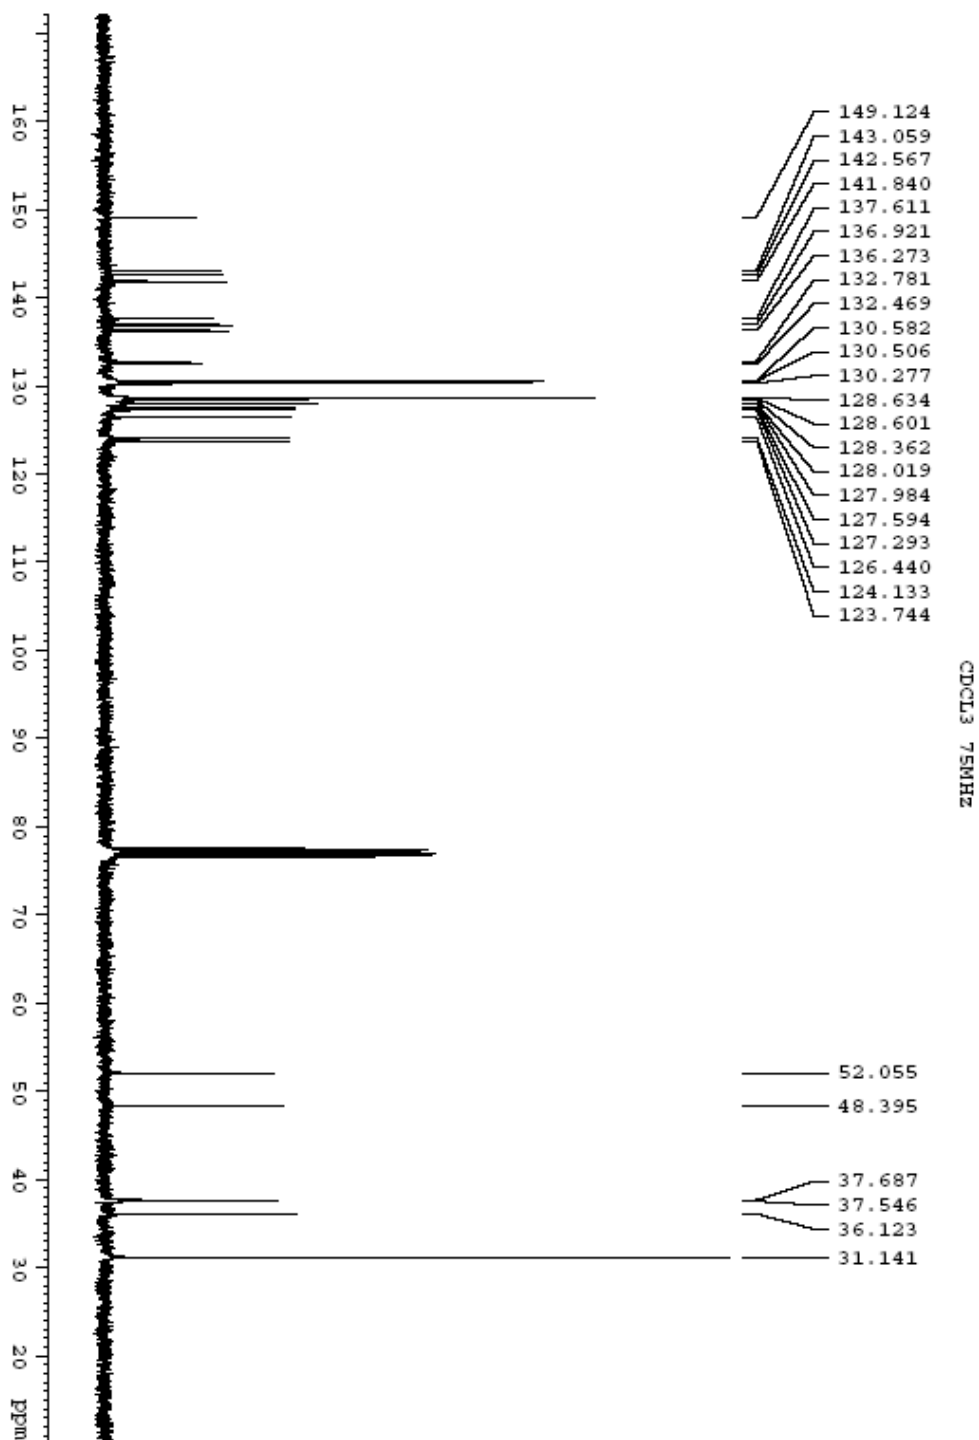

<sup>1</sup>H NMR of **12d**

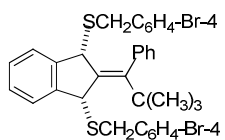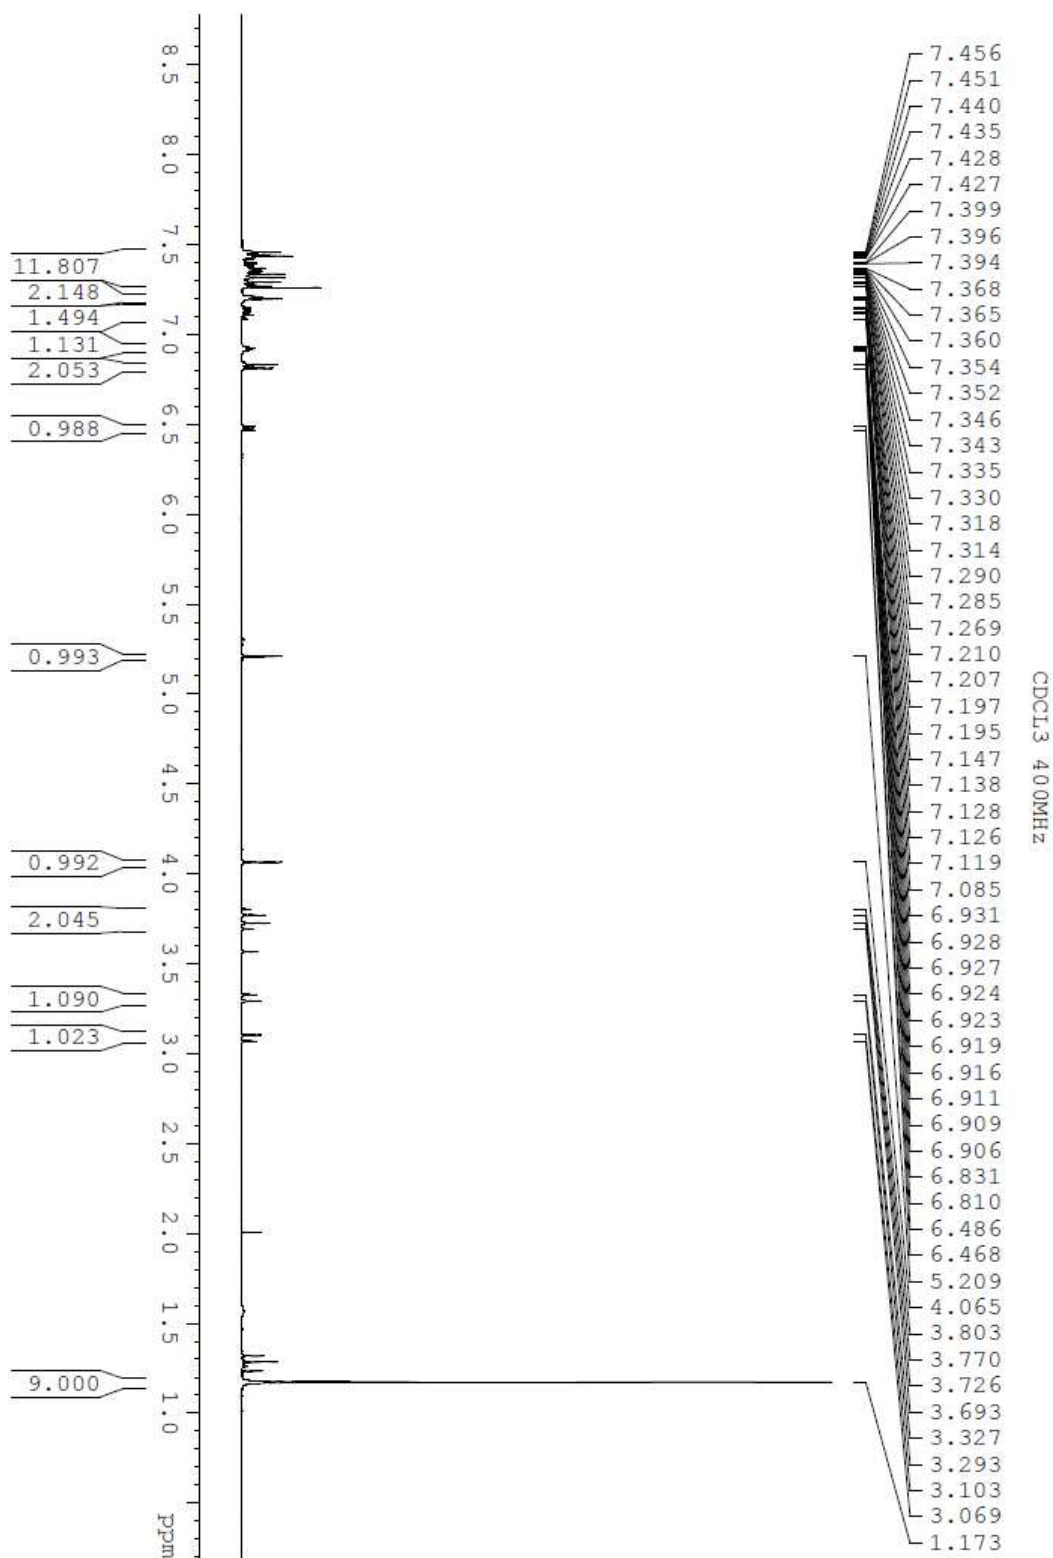

$^{13}\text{C}$  NMR of **12d**

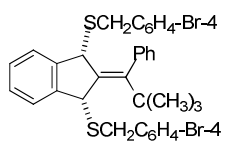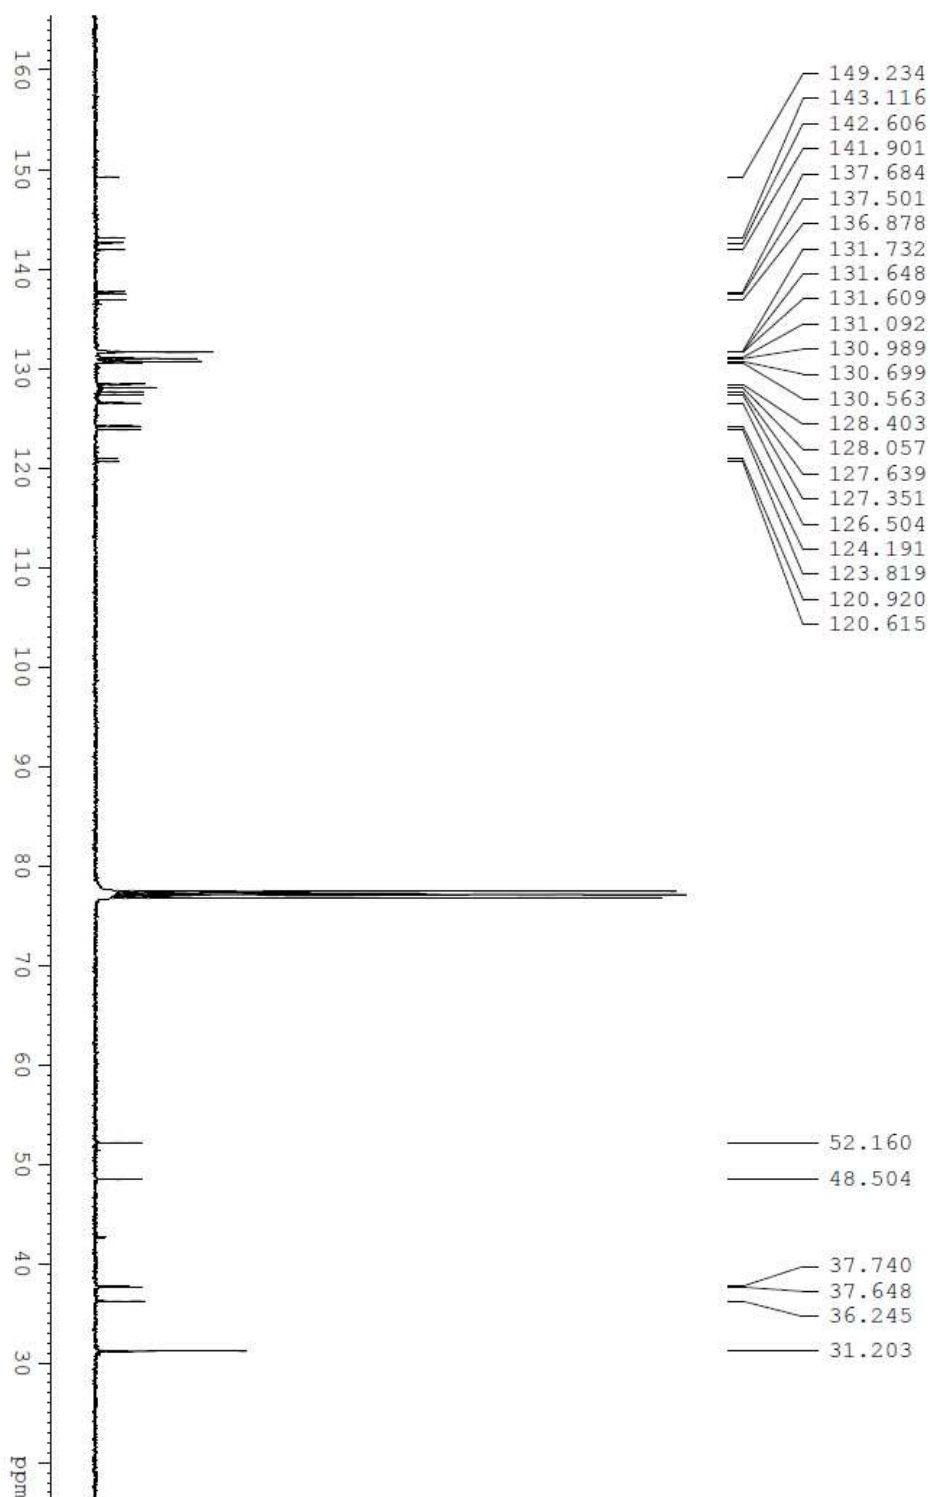

CDCl<sub>3</sub> 100MHz
